# Supplementary material for: Identifying initial transformation products during chlorination of the indole moiety and unveiling their formation mechanisms
Source: Royal Society of Chemistry journal article supplement (doi:10.1039/d4em00196f), 2024-01-01
Supplement: d4em00196f1.pdf [file d4em00196f1.pdf]

## Supporting Information

# **Initial Transformation Products Formation Mechanisms during Chlorination of the Indole Moiety: A Computational Study**

*MengXue Huan, Yong Dong Liu,\* Rugang Zhong*

Beijing Key Laboratory of Environmental and Viral Oncology, College of Chemistry  
and Life Science, Beijing University of Technology, Beijing 100124, China

\*Corresponding author: Phone: 86-10-6739-6211; fax: +86-10-6739-2001.

E-mail: [ydliu@bjut.edu.cn](mailto:ydliu@bjut.edu.cn);

## Text S1

### Quantum Chemical LFER for Estimation of $pK_a$ Values

It is known that, based on the proton theory of acids and bases, acid is a donor of protons. Moreover, the stronger the ability to provide protons, the stronger the acidity. Therefore, the bond dissociation energy (BDE) of  $R_1NR_2(R_3)-H^+$  releasing proton and amine  $R_1NR_2(R_3)$ , as shown in Eq. 1, can be as an indicator of acidity.

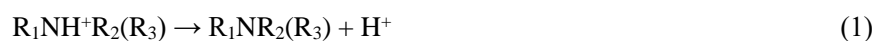

Thus, the BDEs of N-H bonds in nineteen heterocyclic bases were calculated at the M06-2X/cc-pVTZ level with the SMD solvent model. Then the correlation between the BDEs and experimental  $pK_a$  values was established and illustrated in Figure S1 and Table S1, the squared correlation coefficient for the above system is  $R^2 = 0.98$ .

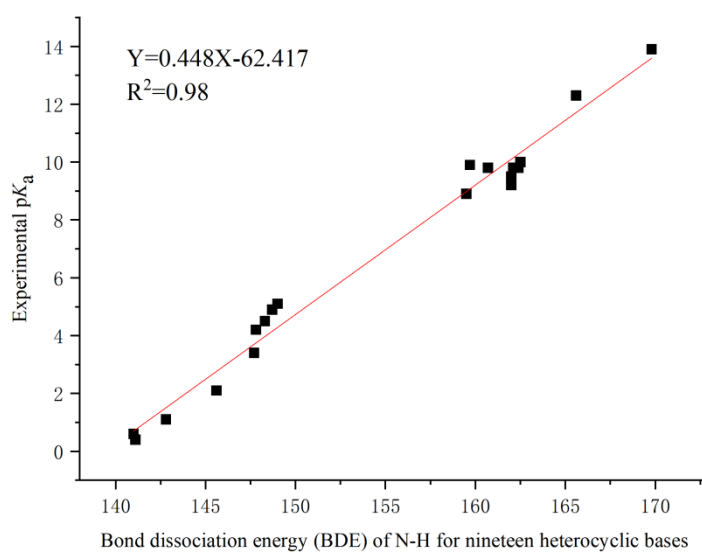

**Figure S1.** The correlation between the experimental  $pK_a$  values and BDEs for nineteen heterocyclic bases.

**Table S1.** The  $pK_a$  values and BDEs of nineteen heterocyclic bases.

| Heterocyclic Bases | BDE (kcal/mol) | $pK_a$ (exp.)     | $pK_a$ (calc.) |
|--------------------|----------------|-------------------|----------------|
| Quinoxaline        | 141.0          | 0.6 <sup>1</sup>  | 0.6            |
| Pyrazine           | 141.1          | 0.4 <sup>2</sup>  | 0.6            |
| Pyrimidine         | 142.8          | 1.1 <sup>1</sup>  | 1.4            |
| Pyridazine         | 145.6          | 2.1 <sup>1</sup>  | 2.7            |
| Phthalazine        | 147.7          | 3.4 <sup>1</sup>  | 3.7            |
| Adenine            | 147.8          | 4.2 <sup>3</sup>  | 3.7            |
| Cytosine           | 148.3          | 4.5 <sup>1</sup>  | 4.0            |
| Quinoline          | 148.7          | 4.9 <sup>4</sup>  | 4.2            |
| Pyridine           | 149.0          | 5.1 <sup>1</sup>  | 4.3            |
| Purine             | 159.5          | 8.9 <sup>3</sup>  | 9.2            |
| Phthalimide        | 159.7          | 9.9 <sup>3</sup>  | 9.3            |
| 3-Methyluracil     | 160.7          | 9.8 <sup>1</sup>  | 9.8            |
| Uracil             | 162.0          | 9.5 <sup>1</sup>  | 10.4           |
| Guanine            | 162.0          | 9.2 <sup>3</sup>  | 10.4           |
| Adenine            | 162.1          | 9.8 <sup>3</sup>  | 10.5           |
| Thymidine          | 162.4          | 9.8 <sup>1</sup>  | 10.6           |
| 1-Methyluracil     | 162.5          | 10.0 <sup>1</sup> | 10.7           |
| Benzimidazole      | 165.6          | 12.3 <sup>3</sup> | 12.1           |
| Indazole           | 169.8          | 13.9 <sup>3</sup> | 14.1           |

Similarly, the BDEs of the C-H bonds in twelve compounds are related to their  $pK_a$  values. Then the correlation between the BDEs of carbon and experimental  $pK_a$  values was established and illustrated in Figure S2 and Table S2, the squared correlation coefficient for the above system is  $R^2 = 0.98$ . Based on the obtained quantum chemical linear free energy relationship (LFER), the calculated  $pK_a$  of indole and tryptophan, and their chlorinated products were listed in Table S3.

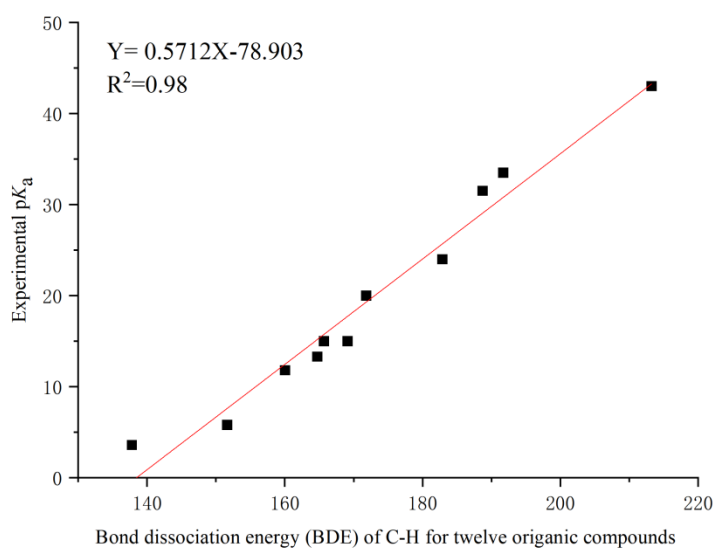**Figure S2.** The correlation between the experimental  $pK_a$  values and BDE for twelve compounds.

**Table S2.** The  $pK_a$  values and BDEs of twelve compounds.

| Compounds                                                                         | BDE   | $pK_a$ (exp.) <sup>5</sup> | $pK_a$ (calc.) |
|-----------------------------------------------------------------------------------|-------|----------------------------|----------------|
|  | 219.8 | 46.0                       | 46.7           |
| PhH                                                                               | 213.2 | 43.0                       | 42.9           |
| Ph <sub>2</sub> C-H(H)                                                            | 191.7 | 33.5                       | 30.6           |
| Ph <sub>3</sub> C-H                                                               | 188.7 | 31.5                       | 28.9           |
| CH <sub>3</sub> -COOH                                                             | 182.9 | 24.0                       | 25.6           |
|  | 171.8 | 20.0                       | 19.2           |
|  | 165.7 | 15.0                       | 15.7           |
| CH <sub>3</sub> -CO-C-H(Cl) <sub>2</sub>                                          | 169.1 | 15.0                       | 17.7           |
| C-H(H)-(COO-C <sub>2</sub> H <sub>5</sub> ) <sub>2</sub>                          | 164.7 | 13.3                       | 15.2           |
| CH <sub>2</sub> -(CN) <sub>2</sub>                                                | 160.0 | 11.8                       | 12.5           |
| C <sub>2</sub> H <sub>5</sub> -O <sub>2</sub> C-C-H(H)-NO                         | 151.6 | 5.8                        | 7.7            |
| CH <sub>2</sub> -(NO <sub>2</sub> ) <sub>2</sub>                                  | 137.8 | 3.6                        | -0.2           |

**Table S3.** The  $pK_a$  values ( $pK_a$  (calc.)) of C, N, and O sites of indole, tryptophan and their chlorinated products by using LFER.

| Compounds        | Heterolytic Reaction                                                      | BDE   | $pK_a$ (calc.) |
|------------------|---------------------------------------------------------------------------|-------|----------------|
| Indole           | Indole $\rightarrow$ N <sub>1</sub> -Indole <sup>-</sup> + H <sup>+</sup> | 172.3 | 14.7           |
|                  | Indole $\rightarrow$ C <sub>2</sub> -Indole <sup>-</sup> + H <sup>+</sup> | 203.9 | 37.6           |
|                  | Indole $\rightarrow$ C <sub>3</sub> -Indole <sup>-</sup> + H <sup>+</sup> | 209.0 | 40.5           |
|                  | Indole $\rightarrow$ C <sub>4</sub> -Indole <sup>-</sup> + H <sup>+</sup> | 212.5 | 42.5           |
|                  | Indole $\rightarrow$ C <sub>5</sub> -Indole <sup>-</sup> + H <sup>+</sup> | 215.8 | 44.4           |
|                  | Indole $\rightarrow$ C <sub>6</sub> -Indole <sup>-</sup> + H <sup>+</sup> | 214.8 | 43.8           |
|                  | Indole $\rightarrow$ C <sub>7</sub> -Indole <sup>-</sup> + H <sup>+</sup> | 208.6 | 40.3           |
| Isomer <b>T1</b> |                                                                           |       |                |
| Tryptophan       | Trp $\rightarrow$ N <sub>1</sub> -Trp <sup>-</sup> + H <sup>+</sup>       | 171.4 | 14.3           |
|                  | Trp $\rightarrow$ C <sub>2</sub> -Trp <sup>-</sup> + H <sup>+</sup>       | 202.8 | 36.9           |
|                  | Trp $\rightarrow$ C <sub>4</sub> -Trp <sup>-</sup> + H <sup>+</sup>       | 213.0 | 42.8           |
|                  | Trp $\rightarrow$ C <sub>5</sub> -Trp <sup>-</sup> + H <sup>+</sup>       | 214.8 | 43.8           |
|                  | Trp $\rightarrow$ C <sub>6</sub> -Trp <sup>-</sup> + H <sup>+</sup>       | 214.1 | 43.4           |
|                  | Trp $\rightarrow$ C <sub>7</sub> -Trp <sup>-</sup> + H <sup>+</sup>       | 208.0 | 39.9           |
|                  | S <sub>E</sub> Ar-1                                                       |       |                |
|                  | 2-Cl-Trp <sup>+</sup> $\rightarrow$ 2-Cl-Trp + H <sup>+</sup>             | 118.5 | -11.2          |
|                  | 3-Cl-Trp <sup>+</sup> $\rightarrow$ 3-Cl-Trp + H <sup>+</sup>             | 139.3 | -0.1           |
|                  | 4-Cl-Trp <sup>+</sup> $\rightarrow$ 4-Cl-Trp + H <sup>+</sup>             | 111.3 | -15.3          |
|                  | 5-Cl-Trp <sup>+</sup> $\rightarrow$ 5-Cl-Trp + H <sup>+</sup>             | 109.9 | -16.1          |

|                                        |                                                                                                         |       |       |
|----------------------------------------|---------------------------------------------------------------------------------------------------------|-------|-------|
|                                        | $6\text{-Cl-Trp}^+ \rightarrow 6\text{-Cl-Trp} + \text{H}^+$                                            | 111.6 | -15.1 |
|                                        | $7\text{-Cl-Trp}^+ \rightarrow 7\text{-Cl-Trp} + \text{H}^+$                                            | 107.3 | -17.6 |
|                                        | <b>Isomer T2</b>                                                                                        |       |       |
|                                        | $\text{Trp} \rightarrow \text{N}_1\text{-Trp}^- + \text{H}^+$                                           | 171.3 | 14.3  |
|                                        | $\text{Trp} \rightarrow \text{C}_2\text{-Trp}^- + \text{H}^+$                                           | 211.7 | 42.0  |
|                                        | $\text{Trp} \rightarrow \text{C}_4\text{-Trp}^- + \text{H}^+$                                           | 211.2 | 41.7  |
|                                        | $\text{Trp} \rightarrow \text{C}_5\text{-Trp}^- + \text{H}^+$                                           | 215.2 | 44.0  |
|                                        | $\text{Trp} \rightarrow \text{C}_6\text{-Trp}^- + \text{H}^+$                                           | 214.2 | 43.4  |
|                                        | $\text{Trp} \rightarrow \text{C}_7\text{-Trp}^- + \text{H}^+$                                           | 208.4 | 40.1  |
|                                        | <b>Isomer T3</b>                                                                                        |       |       |
|                                        | $\text{Trp} \rightarrow \text{N}_1\text{-Trp}^- + \text{H}^+$                                           | 171.4 | 14.3  |
|                                        | $\text{Trp} \rightarrow \text{C}_2\text{-Trp}^- + \text{H}^+$                                           | 211.9 | 42.1  |
|                                        | $\text{Trp} \rightarrow \text{C}_4\text{-Trp}^- + \text{H}^+$                                           | 212.6 | 42.5  |
|                                        | $\text{Trp} \rightarrow \text{C}_5\text{-Trp}^- + \text{H}^+$                                           | 215.9 | 44.4  |
|                                        | $\text{Trp} \rightarrow \text{C}_6\text{-Trp}^- + \text{H}^+$                                           | 214.6 | 43.7  |
|                                        | $\text{Trp} \rightarrow \text{C}_7\text{-Trp}^- + \text{H}^+$                                           | 208.4 | 40.1  |
|                                        | <hr/>                                                                                                   |       |       |
| 2-O-3-R-Indoline                       | $2\text{-O-3-R-Indoline} \rightarrow \text{N}_1\text{-2-O-3-R-Indoline}^- + \text{H}^+$                 | 166.8 | 12.2  |
|                                        | $2\text{-O-3-R-Indoline} \rightarrow \text{C}_3\text{-2-O-3-R-Indoline}^- + \text{H}^+$                 | 165.3 | 15.5  |
|                                        | $\text{N}_1\text{-2-O-3-R-Indoline}^- \rightarrow \text{N}_1\text{-2-O-3-R-Indoline}^{2-} + \text{H}^+$ | 179.6 | 23.7  |
| 2-OH-3-R-Indole                        | $2\text{-OH-3-R-Indole} \rightarrow \text{N}_1\text{-2-OH-3-R-Indole}^- + \text{H}^+$                   | 168.3 | 12.9  |
|                                        | $2\text{-OH-3-R-Indole} \rightarrow \text{O-2-OH-3-R-Indole}^- + \text{H}^+$                            | 161.0 | 10.4  |
|                                        | $\text{O-2-OH-3-R-Indole}^- \rightarrow \text{O-2-OH-3-R-Indole}^{2-} + \text{H}^+$                     | 181.1 | 18.7  |
| 2-O-3-Cl-3-R-Indoline                  | $2\text{-O-3-Cl-3-R-Indoline} \rightarrow 2\text{-O-3-Cl-3-R-Indoline}^- + \text{H}^+$                  | 162.7 | 10.4  |
| 2-OH-3-R-3H-Indole                     | $2\text{-OH-3-R-3H-Indole} \rightarrow \text{O-2-OH-3-R-3H-Indole}^- + \text{H}^+$                      | 148.9 | 6.2   |
| Int 3                                  | $\text{Int 3} \rightarrow \text{Int 3}^- + \text{H}^+$                                                  | 145.8 | 5.1   |
| Int 3 <sup>-</sup> (X=O <sup>-</sup> ) | $\text{Int 3}^- \rightarrow \text{Int 3}^{2-} + \text{H}^+$                                             | 169.9 | 13.6  |
| Int 3 <sup>-</sup> (X=OCl)             | $\text{Int 3}^- \rightarrow \text{Int 3}^{2-} + \text{H}^+$                                             | 150.3 | 4.9   |
| 2-OH-3-Cl-3-R-Indoline                 | $2\text{-OH-3-Cl-3-R-Indoline} \rightarrow 2\text{-OH-3-Cl-3-R-Indoline}^- + \text{H}^+$                | 177.7 | 17.1  |
| 2-OCl-3-Cl-3-R-Indoline                | $2\text{-OCl-3-Cl-3-R-Indoline} \rightarrow 2\text{-OCl-3-Cl-3-R-Indoline}^- + \text{H}^+$              | 175.3 | 16.0  |
| 2-OH-3-OH-3-R-Indoline                 | $2\text{-OH-3-OH-3-R-Indoline} \rightarrow 2\text{-OH-3-OH-3-R-Indoline}^- + \text{H}^+$                | 181.9 | 19.0  |
| 2-OCl-3-OH-3-R-Indoline                | $2\text{-OCl-3-OH-3-R-Indoline} \rightarrow 2\text{-OCl-3-OH-3-R-Indoline}^- + \text{H}^+$              | 175.9 | 16.3  |
| 2-OH-3-OCl-3-R-Indoline                | $2\text{-OH-3-OCl-3-R-Indoline} \rightarrow 2\text{-OH-3-OCl-3-R-Indoline}^- + \text{H}^+$              | 176.8 | 16.7  |
| 2-OCl-3-OCl-3-R-Indoline               | $2\text{-OCl-3-OCl-3-R-Indoline} \rightarrow 2\text{-OCl-3-OCl-3-R-Indoline}^- + \text{H}^+$            | 173.8 | 15.4  |
| Int 6                                  | $\text{Int 6} \rightarrow \text{Int 6}^- + \text{H}^+$                                                  | 164.9 | 15.5  |

1. R. Williams,  $pK_a$  Values INDEX, ACS, Organic Division, 2022.
2. S. Tshepelevitsh, A. Kütt, M. Lõkov, I. Kaljurand, J. Saame, A. Heering, P. G. Plieger, R. Vianello and I. Leito, On the Basicity of Organic Bases in Different Media, *Eur. J. Org. Chem.*, 2019, 6735-6748.
3. K. L. Geremia and P. G. Seybold, Computational estimation of the acidities of purines and indoles, *J. Mol. Model.*, 2019, **25**, 12.
4. D. D. Perrin, B. Dempsey and E. P. Serjeant,  $pK_a$  prediction for organic acids and bases, London: Chapman and Hall, 1981, **1**.
5. D. Ripin and D. Evans,  $pK_a$ 's of Inorganic and Oxo-Acids(accessed Jan 2021). 2005.
6. J. J. Kirkland, Stability of Silica-Based, Monofunctional C18 Bonded-Phase Column Packing for HPLC at High pH, *J. Chromatogr. Sci.*, 1996, **34**, 309-313.

## Text S2

### Different isomers and factions of different forms for each substrates

*Indole.* According to the different double bond positions in the pyrrole ring, three indole isomers were found as depicted in Figure S3, and Table S4 shows that isomer **I1** is more stable than isomer **I2** and **I3** with the relative free energy (RG) lower by 10–29 kcal/mol, leading to the Boltzmann distribution proportion  $f(\mathbf{I1})$  value of  $\sim 1$ . Thus, only isomer **I1** was investigated in chlorination of indole. The  $pK_a$  value of the N1–H moiety in indole is 16.97<sup>6</sup>, implying that the neutral indole form (NH) is predominant at pH 7 and the fraction of its anion form  $p(A)$  value is  $10^{-10}$ , which makes no or few contribution to the estimated apparent rate constant  $k_{\text{obs-est}}$  (see Table S7).

*Trp.* Due to zwitterion species being dominant for most amino acids, thus, the zwitterion form of the backbone in Trp was taken in chlorination of the indole moiety. According to the different structures of the backbone, nine Trp isomers were found as shown in Figure S3, and Table S4 shows that the RG values for isomers **T1–T3** are within 1 kcal/mol, leading to their Boltzmann distribution population  $f$  values being 0.52, 0.24, and 0.11, respectively. Due to their total percentage accounting for >85%, isomers **T1–T3** were chosen to represent Trp. So far no  $pK_a$  values of the N1–H moiety in isomers **T1–T3** have been reported, therefore, their  $pK_a$  values were calculated as described in Text S1. The calculated  $pK_a$  values of isomers **T1–T3** are very close to that of indole (14.3 vs. 14.7), and based upon the calculated results for indole, it infers that the neutral indole moiety (NH) is predominant at pH 7 and the fraction of the anion form  $p(A)$  is ignorable. Different from indole, there are two attack ways by HOCl on the indole moiety in Trp from the same and the opposite sides of the R group (Figure S4), but only the attack from the opposite side was discussed due to their relatively lower  $\Delta G^\ddagger$  values than the same side for almost all the sites (Table S10) probably ascribed to the steric hindrance effect.

*2-O-3-R-Indoline.* Three 2-O-3-R-Indoline isomers were found as depicted in Figure S3, and Table S4 displays that isomer **OT1** is the most stable one with the RG lower than isomers **OT2** and **OT3** by 4 and 12 kcal/mol, respectively, leading to the  $f$  values of above isomers of 0.9971, 0.0029, and  $10^{-9}$ , respectively. Considering tiny fraction of **OT3**, only isomers **OT1** and **OT2** were studied. The

calculated  $pK_{a1}$  and  $pK_{a1}'$  values of the N–H and C3–H moieties in **OT1** are 12.2 and 15.5, respectively, those of the O–H and N–H moieties in **OT2** are 10.4 and 12.9, respectively, and their  $pK_{a2}$  values are 23.7 and 18.7, respectively. This indicates that neutral forms of **OT1** and **OT2** are predominant at pH 7 with  $p(N)$  values of 0.9996–0.9999, while  $p(A^-)$  values are  $10^{-6}$ –0.0004 and  $p(A^{2-})$  are ignorable.

*2-X-3-Cl-3-R-Indoline* ( $X=OH/OCl$ ). The calculated  $pK_a$  of the N–H in 2-OH-3-Cl-3-R-Indoline is 17.1. This indicates that neutral form of 2-OH-3-OCl-3-R-Indoline is predominant at pH 7 with  $p(N)$  value of 0.9999, while  $p(A^-)$  value is  $10^{-10}$ , so anion form is ignored. The calculated  $pK_a$  of the N–H in 2-OCl-3-Cl-3-R-Indoline is 16.0. This indicates that neutral form of 2-OCl-3-OCl-3-R-Indoline is predominant at pH 7 with  $p(N)$  value of 0.9999, while  $p(A^-)$  value is  $10^{-9}$ , so anion form is also considered.

*2-O-3-Cl-3-R-Indoline*. Two isomers **OCIT1** and **OCIT2** were obtained as shown in Figure S3. Table S4 displays that isomer **OCIT1** is more stable than isomer **OCIT2** with the RG lower than by 14 kcal/mol, therefore, only the former is investigated. The calculated  $pK_a$  of the N–H in **OCIT1** is 10.4. This indicates that neutral form of **OCIT1** is predominant at pH 7 with  $p(N)$  value of 0.9996, while  $p(A^-)$  value is  $3.7 \times 10^{-4}$ , so both should be considered.

**Int 3** ( $X=O^-/OCl$ ). The calculated  $pK_{a1}$  of the O–H in **Int 3** ( $X=O^-$ ) is 5.1 and  $pK_{a2}$  of the N–H is 13.6. This indicates that the anion form with -1 charge ( $A^-$ ), and anion form with -2 charge ( $A^{2-}$ ) at pH 7 account for 0.9999 and  $10^{-7}$ , and anion form with -1 charge ( $A^{1-}$ ) of **Int 3** ( $X=O^-$ ) is predominant, while both two forms are considered. The calculated  $pK_a$  of the N–H in **Int 3** ( $X=OCl$ ) is 4.9. This indicates that the anion form with -1 charge ( $A^-$ ) is predominant at pH 7 with  $p(A^-)$  value of 0.9921, while  $p(N)$  value is  $7.9 \times 10^{-3}$ , so only anion form is considered.

*2-X-3-Y-3-R-Indoline* ( $X=OH/OCl$ ,  $Y=OH/OCl$ ). The calculated  $pK_a$  of the N–H in 2-OH-3-OH-3-R-Indoline is 19.0. This indicates that neutral form of 2-OH-3-OH-3-R-Indoline is predominant at pH 7 with  $p(N)$  value of 0.9999, while  $p(A^-)$  value is  $10^{-12}$ , so anion form is ignored. The calculated  $pK_a$  of the N–H in 2-OCl-3-OH-3-R-Indoline is 16.3. This indicates that neutral form of 2-OCl-3-



OH-3-R-Indoline is predominant at pH 7 with  $p(N)$  value of 0.9999, while  $p(A^-)$  value is  $10^{-10}$ , so anion form is considered. The calculated  $pK_a$  of the N–H in 2-OH-3-OCl-3-R-Indoline is 16.7. This indicates that neutral form of 2-OH-3-OCl-3-R-Indoline is predominant at pH 7 with  $p(N)$  value of 0.9999, while  $p(A^-)$  value is  $10^{-10}$ , so anion form is considered. The calculated  $pK_a$  of the N–H in 2-OCl-3-OCl-3-R-Indoline is 15.4. This indicates that neutral form of 2-OCl-3-OCl-3-R-Indoline is predominant at pH 7 with  $p(N)$  value of 0.9999, while  $p(A^-)$  value is  $10^{-9}$ , so anion form is also considered.

**Int 6.** The calculated  $pK_a$  of the N–H in **Int 6** is 15.5. This indicates that neutral form of **Int 6** is predominant at pH 7 with  $p(N)$  value of 0.9999, while  $p(A^-)$  value is  $10^{-9}$ , so both forms should be considered.

**Table S4.** Relative energies (RG, in kcal/mol) and  $f$  of indole, tryptophan, 2-O-3-R-Indoline and 2-O-3-Cl-3-R-Indoline isomers.

|                       | Isomer       | RG   | $f$       | Isomer       | RG   | $f$        |
|-----------------------|--------------|------|-----------|--------------|------|------------|
| Indole                | <b>I1</b>    | 0.0  | 0.9999    | <b>I3</b>    | 28.8 | $10^{-22}$ |
|                       | <b>I2</b>    | 10.0 | $10^{-8}$ |              |      |            |
| Tryptophan            | <b>T1</b>    | 0.0  | 0.5218    | <b>T6</b>    | 1.9  | 0.0199     |
|                       | <b>T2</b>    | 0.5  | 0.2434    | <b>T7</b>    | 2.0  | 0.0182     |
|                       | <b>T3</b>    | 1.0  | 0.1050    | <b>T8</b>    | 2.9  | 0.0039     |
|                       | <b>T4</b>    | 1.3  | 0.0543    | <b>T9</b>    | 4.2  | 0.0004     |
|                       | <b>T5</b>    | 1.6  | 0.0332    |              |      |            |
| 2-O-3-R-Indoline      | <b>OT1</b>   | 0.0  | 0.9971    | <b>OT3</b>   | 12.0 | $10^{-9}$  |
|                       | <b>OT2</b>   | 3.5  | 0.0029    |              |      |            |
| 2-O-3-Cl-3-R-Indoline | <b>OCIT1</b> | 0.0  | 0.9999    | <b>OCIT2</b> | 13.8 | $10^{-11}$ |

Indole

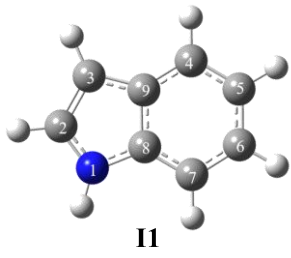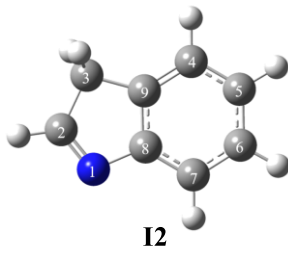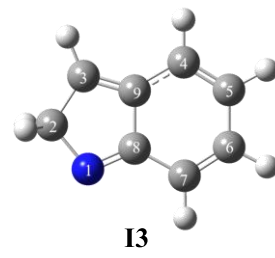

Tryptophan

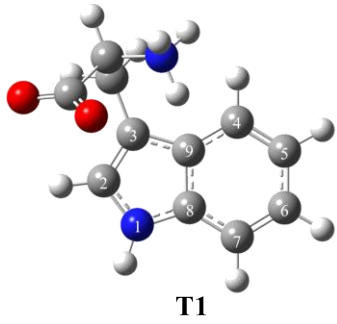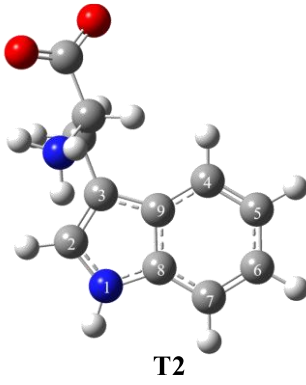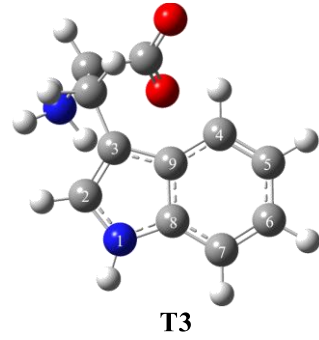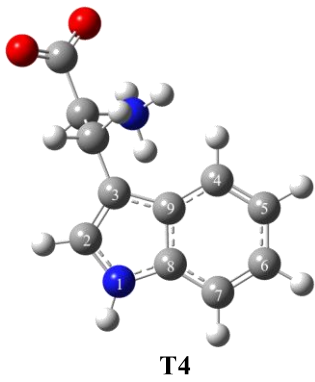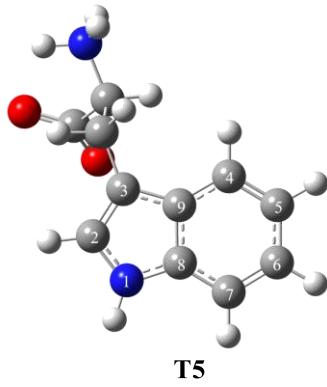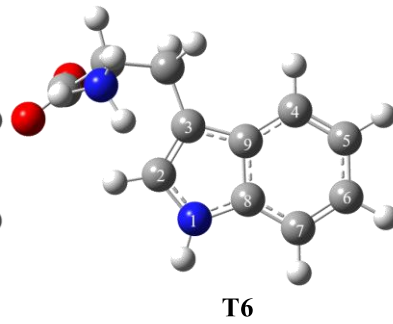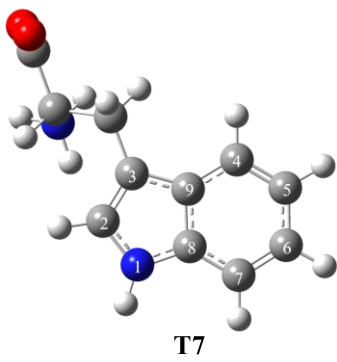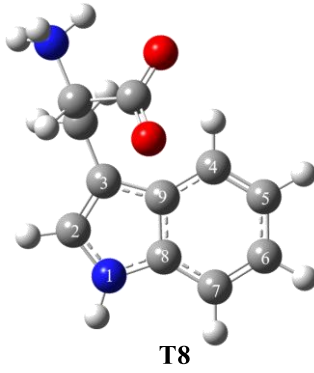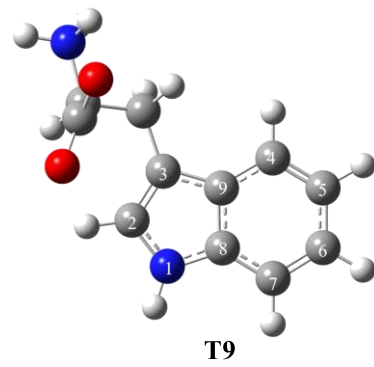

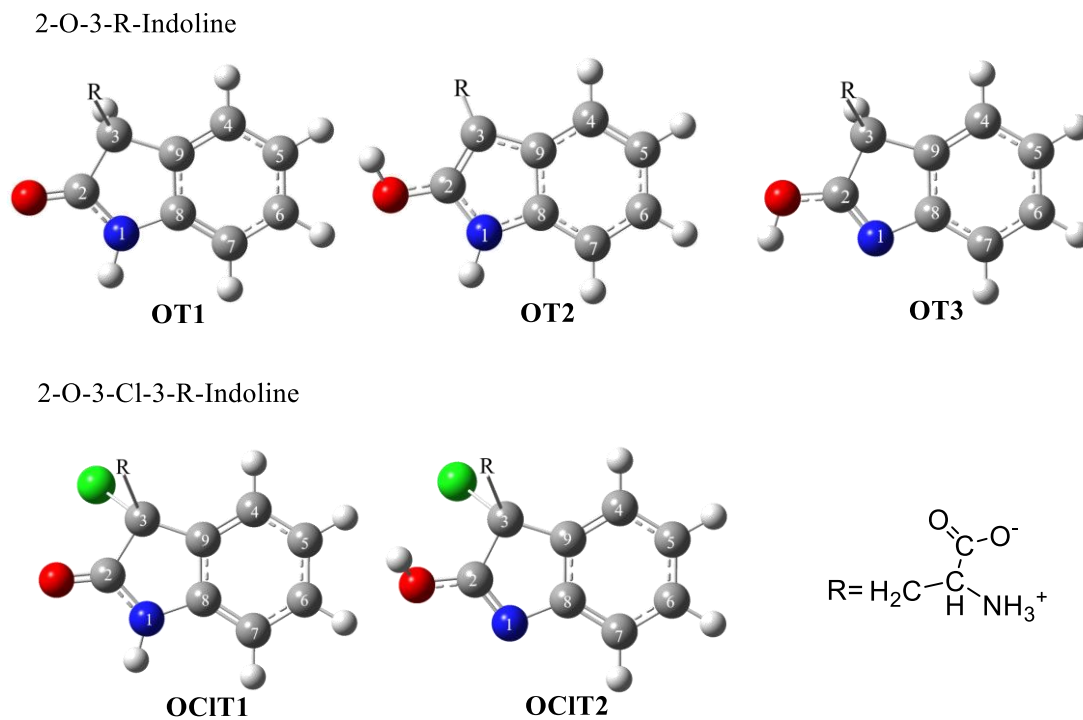

**Figure S3.** The spatial structure of indole, tryptophan, 2-O-3-R-Indoline and 2-O-3-Cl-3-R-Indoline isomers.

**Table S5.** The heterolytic bond dissociation energies (HEBDEs, in kcal/mol) of the H-N/C bond for Indole and Isomer **T1** and the chlorinated Trp cations (2/3/4/5/6/7-Cl-Trp<sup>+</sup>) calculated at the M06-2X/cc-pVTZ level.

| Substance             | N1    | C2    | C3    | C4    | C5    | C6    | C7    |
|-----------------------|-------|-------|-------|-------|-------|-------|-------|
| Indole                | 172.3 | 203.9 | 209.0 | 209.0 | 212.5 | 215.8 | 214.8 |
| Isomer <b>T1</b>      | 171.4 | 202.8 | --    | 213.0 | 214.8 | 214.1 | 208.0 |
| 2-Cl-Trp <sup>+</sup> | 147.2 | 118.5 | --    | 157.0 | 200.6 | 198.0 | 194.5 |
| 3-Cl-Trp <sup>+</sup> | 139.3 | 171.0 | --    | 201.2 | 205.0 | 204.5 | 194.9 |
| 4-Cl-Trp <sup>+</sup> | 148.2 | 181.9 | --    | 111.3 | 192.2 | 184.9 | 185.7 |
| 5-Cl-Trp <sup>+</sup> | 149.0 | 189.9 | --    | 188.9 | 109.9 | 192.4 | 191.6 |
| 6-Cl-Trp <sup>+</sup> | 147.4 | 180.6 | --    | 200.5 | 196.9 | 111.6 | 183.1 |
| 7-Cl-Trp <sup>+</sup> | 148.4 | 190.8 | --    | 191.2 | 182.0 | 188.6 | 107.3 |

(a) Concerted electrophilic substitution mechanism. (b) Classic electrophilic substitution on an aromatic group (S<sub>E</sub>Ar)

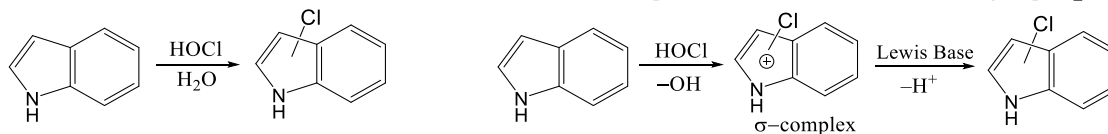

**Scheme S1.** Proposed chlorination mechanisms of indole ring in literature

**Table S6.** The activation free energy ( $\Delta G^\ddagger$ , in kcal/mol) and reaction enthalpy changes ( $\Delta H$ , in kcal/mol) of HOCl attacking the indole via the  $S_{EAr}$  and concerted mechanisms.

| Reactive site | Neutral             |            |                     |            |                     |            | Anion               |            |
|---------------|---------------------|------------|---------------------|------------|---------------------|------------|---------------------|------------|
|               | $S_{EAr-1}$         |            | $S_{EAr-2}$         |            | Concerted           |            | $S_{EAr-1}$         |            |
|               | $\Delta G^\ddagger$ | $\Delta H$ |
| N1            | --                  | --         | --                  | --         | 22.9                | -15.6      | --                  | --         |
| C2            | 17.5                | 2.7        | 4.7                 | -19.2      | 21.0                | -13.4      | 14.3                | -20.1      |
| C3            | 11.2                | -6.7       | 5.8                 | -10.5      | 11.9                | -31.9      | 5.5                 | -36.4      |
| C4            | 22.9                | 4.8        | 2.0                 | -34.9      | 24.3                | -10.9      | 10.6                | -17.2      |
| C5            | 22.1                | 6.6        | 1.5                 | -24.4      | 23.6                | -11.5      | 11.1                | -15.7      |
| C6            | 21.4                | 4.9        | 3.2                 | -24.9      | 22.2                | -13.5      | 15.6                | -14.1      |
| C7            | 21.5                | 6.9        | 1.2                 | -34.7      | 22.4                | -11.2      | 13.2                | -10.3      |

**Table S7.** The activation free energy ( $\Delta G^\ddagger$ , in kcal/mol), estimated apparent rate constants ( $k_{obs-est}$ , in  $M^{-1} min^{-1}$ ), and the contribution ( $c$ , %) from neutral and anion forms to each reactive site and  $k_{obs-est}$  of indole  $S_{EAr}$  mechanism and concerted mechanism for N1 site.

| Reactive site | Neutral form (NH)   |                      |        | Anion form (N <sup>-</sup> ) |                      |       | Indole               |
|---------------|---------------------|----------------------|--------|------------------------------|----------------------|-------|----------------------|
|               | $\Delta G^\ddagger$ | $k_{obs-est}$        | $c$    | $\Delta G^\ddagger$          | $k_{obs-est}$        | $c$   | $k_{obs-est}$        |
| N1            | 22.9                | $1.1 \times 10^{-4}$ | 100.0% | --                           | --                   | --    | $1.1 \times 10^{-4}$ |
| C2            | 17.5                | $9.2 \times 10^{-1}$ | 100.0% | 14.3                         | $2.2 \times 10^{-8}$ | 0.0%  | $9.2 \times 10^{-1}$ |
| C3            | 11.2                | $4.3 \times 10^4$    | 100.0% | 5.5                          | $6.3 \times 10^{-2}$ | 0.0%  | $4.3 \times 10^4$    |
| C4            | 22.9                | $1.0 \times 10^{-4}$ | 90.0%  | 10.6                         | $1.2 \times 10^{-5}$ | 10.1% | $1.2 \times 10^{-4}$ |
| C5            | 22.1                | $4.5 \times 10^{-4}$ | 99.0%  | 11.1                         | $5.2 \times 10^{-6}$ | 1.2%  | $4.5 \times 10^{-4}$ |
| C6            | 21.4                | $1.4 \times 10^{-3}$ | 100.0% | 15.6                         | $2.4 \times 10^{-9}$ | 0.0%  | $1.4 \times 10^{-3}$ |
| C7            | 21.5                | $1.1 \times 10^{-3}$ | 100.0% | 13.2                         | $1.4 \times 10^{-7}$ | 0.0%  | $1.1 \times 10^{-3}$ |

The fractions of neutral and anion form  $f(NH)$  and  $f(N^-)$  in indole **1** are 0.999 and  $1.1 \times 10^{-10}$ , respectively.

**Table S8.** The activation free energy ( $\Delta G^\ddagger$ , in kcal/mol) for the chlorination of the indole C3 site concerted and  $S_{EAr}$  mechanisms by HOCl calculated with M06-2X(D3), M05-2X(D3), BMK(D3) and B3LYP(D3) functionals along with 6-31G(d), 6-31+G(d) and 6-311G(d) basis sets and the implicit SMD solvent model. To obtain more accurate energies, single point calculations were performed using the cc-pVTZ or aug-cc-pVTZ basis sets.

| Basis set | M06-2X(D3) |           | M05-2X(D3) |           | BMK(D3)   |           | B3LYP(D3) |           |
|-----------|------------|-----------|------------|-----------|-----------|-----------|-----------|-----------|
|           | Concerted  | $S_{EAr}$ | Concerted  | $S_{EAr}$ | Concerted | $S_{EAr}$ | Concerted | $S_{EAr}$ |
| 6-31G(d)  | 12.5       | 10.9      | 9.9        | 9.5       | 8.4       | 6.1       | 2.0       | 2.7       |
| 6-31+G(d) | 11.3       | 11.0      | 9.0        | 8.2       | 6.4       | 4.6       | 4.0       | 2.3       |
| 6-311G(d) | 11.9       | 11.2      | 10.5       | 9.1       | 8.8       | 5.1       | 4.1       | 1.0       |

**Table S9.** The activation free energies ( $\Delta G^\ddagger$ , in kcal/mol) and estimated rate constants  $k_{\text{est}}$  (in  $\text{M}^{-1} \text{min}^{-1}$ ) in chlorination at C3 site of indole via  $\text{S}_{\text{E}}\text{Ar}$  mechanism assisted by 2-6 water molecules.

|                     | 2w                | 3w                | 4w                | 5w                | 6w                |
|---------------------|-------------------|-------------------|-------------------|-------------------|-------------------|
| $\Delta G^\ddagger$ | 14.8              | 13.0              | 14.7              | 11.2              | 9.6               |
| $k_{\text{est}}$    | $5.7 \times 10^3$ | $1.2 \times 10^5$ | $6.7 \times 10^3$ | $2.5 \times 10^6$ | $3.6 \times 10^7$ |

(a) The same side attack

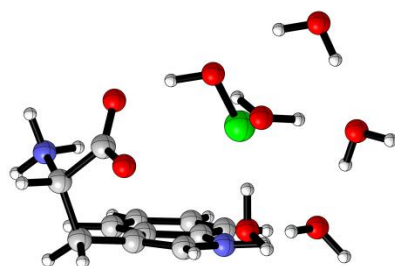

(b) The opposite side attack

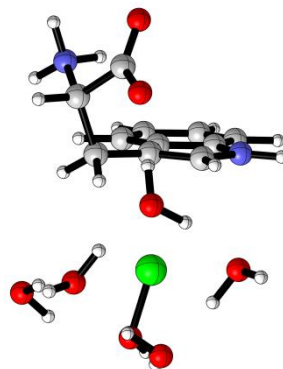

**Figure S4.** Two ways for HOCl attacking the indole ring moiety in isomer **T1** of (a) The same side attack; (b) The opposite side attack.

**Table S10.** The activation free energy ( $\Delta G^\ddagger$ , in kcal/mol) and reaction enthalpy changes ( $\Delta H$ , in kcal/mol) of opposite side and same side attack of seven reaction sites of three isomers of Trp with HOCl.

| Mechanism                      | Site | Opposite side attack |            |            | Same side attack |            |            |
|--------------------------------|------|----------------------|------------|------------|------------------|------------|------------|
|                                |      | <b>T1</b>            | <b>T2</b>  | <b>T3</b>  | <b>T1</b>        | <b>T2</b>  | <b>T3</b>  |
| Concerted                      | N1   | 23.0/-20.9           | 24.2/-16.7 | 22.8/-20.0 | 31.1/-5.5        | 22.4/-15.1 | 28.6/-8.0  |
|                                | C2   | 18.4/-15.2           | 20.2/-17.2 | 20.1/-18.8 | 26.7/-11.6       | 21.1/-16.0 | 22.7/-14.2 |
|                                | C3   | 13.8/-31.1           | 14.7/-29.8 | 13.9/-29.6 | --               | --         | --         |
|                                | C4   | 25.5/-10.3           | 25.1/-9.2  | 26.8/-11.4 | 25.2/-5.6        | 23.3/-6.6  | 30.0/0.3   |
|                                | C5   | 24.6/-10.9           | 24.1/-10.3 | 24.8/-12.0 | 26.5/-6.9        | 24.3/-7.9  | 30.8/-4.6  |
|                                | C6   | 23.8/-15.6           | 23.9/-12.4 | 24.0/-13.4 | 26.6/-8.4        | 25.4/-10.4 | 32.1/-5.6  |
|                                | C7   | 23.6/-10.6           | 24.3/-10.4 | 24.1/-11.1 | 31.1/-1.8        | 25.3/-7.3  | 23.4/-10.2 |
| $\text{S}_{\text{E}}\text{Ar}$ | C2   | 17.9/1.8             | 18.0/0.2   | 17.8/2.4   | 24.5/3.6         | 15.0/0.3   | 30.5/16.3  |
|                                | C3   | 12.8/-4.9            | 14.2/-0.4  | 13.6/-1.8  | --               | --         | --         |
|                                | C4   | 21.2/3.2             | 24.5/11.7  | 24.3/10.2  | 19.8/7.3         | 28.4/-2.3  | 35.2/18.5  |
|                                | C5   | 21.9/8.8             | 22.2/8.1   | 22.1/8.3   | 27.5/16.9        | 22.7/9.3   | 29.3/13.8  |
|                                | C6   | 21.6/5.5             | 21.7/6.7   | 21.5/6.0   | 22.4/6.0         | 23.4/7.4   | 34.1/22.2  |
|                                | C7   | 22.4/7.8             | 23.0/8.0   | 21.9/7.1   | 33.7/19.6        | 24.0/7.1   | 34.4/19.6  |

**Table S11.** The estimated apparent rate constants ( $k_{\text{obs-est}}$ , in  $\text{M}^{-1} \text{s}^{-1}$ ) and contributions ( $c$ , %) to each reactive site of seven reaction sites of three isomers of Trp with HOCl.

|    | <b>T1</b>                    | <b>T2</b>                    | <b>T3</b>                    | <b>Trp</b>           |
|----|------------------------------|------------------------------|------------------------------|----------------------|
| N1 | $4.5 \times 10^{-5}$ (72.4%) | $3.1 \times 10^{-6}$ (5.0%)  | $1.4 \times 10^{-5}$ (22.6%) | $6.2 \times 10^{-5}$ |
| C2 | $2.6 \times 10^{-1}$ (60.4%) | $1.1 \times 10^{-1}$ (24.7%) | $6.5 \times 10^{-2}$ (15.0%) | $4.4 \times 10^{-1}$ |
| C3 | $1.5 \times 10^3$ (91.6%)    | $6.3 \times 10^1$ (3.7%)     | $7.9 \times 10^1$ (4.7%)     | $1.7 \times 10^3$    |
| C4 | $1.1 \times 10^{-3}$ (99.7%) | $1.9 \times 10^{-6}$ (0.2%)  | $1.0 \times 10^{-6}$ (0.1%)  | $1.1 \times 10^{-3}$ |
| C5 | $3.3 \times 10^{-4}$ (72.6%) | $8.0 \times 10^{-5}$ (17.8%) | $4.3 \times 10^{-5}$ (9.7%)  | $4.5 \times 10^{-4}$ |
| C6 | $5.2 \times 10^{-4}$ (61.4%) | $2.0 \times 10^{-4}$ (24.2%) | $1.2 \times 10^{-4}$ (14.4%) | $8.5 \times 10^{-4}$ |
| C7 | $1.3 \times 10^{-4}$ (61.1%) | $2.4 \times 10^{-5}$ (11.2%) | $5.9 \times 10^{-5}$ (27.7%) | $2.1 \times 10^{-4}$ |

**Table S12.** The APT charge of Trp, 3-Cl-Trp<sup>+</sup>, 2-OH-3-R-Indole, and 2-O-3-Cl-3-R-Indoline<sup>-</sup>.

|    | Trp    | 3-Cl-Trp <sup>+</sup> | 2-OH-3-R-Indole | 2-O-3-Cl-3-R-Indoline <sup>-</sup> |
|----|--------|-----------------------|-----------------|------------------------------------|
| N1 | -0.776 | -0.500                | -0.889          | -1.575                             |
| C2 | 0.239  | 0.506                 | 1.370           | 1.797                              |
| C3 | -0.251 | 0.491                 | -0.614          | 0.513                              |
| C4 | 0.032  | -0.061                | -0.035          | 0.149                              |
| C5 | -0.164 | -0.042                | -0.117          | -0.365                             |
| C6 | -0.117 | -0.027                | -0.194          | 0.146                              |
| C7 | -0.006 | -0.084                | 0.049           | -0.317                             |

**Table S13.** The activation free energies ( $\Delta G^\ddagger$ , in kcal/mol) of isomers **OT1** and **OT2** and their anion forms **OT1<sup>-</sup>** and **OT2<sup>-</sup>** of 2-O-3-R-Indoline reacting with HOCl.

| Reactive Site | <b>OT1</b> | <b>OT1<sup>-</sup></b> | <b>OT2</b> | <b>OT2<sup>-</sup></b> |
|---------------|------------|------------------------|------------|------------------------|
| N1            | 28.7       | 1.6                    | 22.3       | 12.8                   |
| C2            | --         | --                     | 23.4       | --                     |
| C3            | --         | --                     | 6.8        | 2.1                    |
| C4            | 38.6       | 30.9                   | 17.4       | 7.9                    |
| C5            | 23.8       | 11.4                   | 23.7       | 15.4                   |
| C6            | 35.8       | 29.5                   | 16.1       | 7.6                    |
| C7            | 30.2       | 14.4                   | 22.4       | 16.9                   |

**Table S14.** The estimated apparent rate constants ( $k_{\text{obs-est}}$ , in  $\text{M}^{-1} \text{s}^{-1}$ ) and contributions ( $c$ , %) to seven reaction sites of two isomer and their anion forms of 2-O-3-R-Indoline with HOCl.

|    | OT1                             | OT1 <sup>-</sup>                 | OT2                              | OT2 <sup>-</sup>               | 2-O-3-R-Indoline     |
|----|---------------------------------|----------------------------------|----------------------------------|--------------------------------|----------------------|
| N1 | $6.2 \times 10^{-9}$<br>(0.0%)  | $5.7 \times 10^3$<br>(100.0%)    | $8.6 \times 10^{-7}$<br>(0.0%)   | $2.9 \times 10^{-3}$<br>(0.0%) | $5.7 \times 10^3$    |
| C2 | --                              | --                               | $1.3 \times 10^{-7}$<br>(100.0%) | --                             | $1.3 \times 10^{-7}$ |
| C3 | --                              | --                               | $2.0 \times 10^5$<br>(99.5%)     | $1.1 \times 10^3$<br>(0.5%)    | $2.0 \times 10^5$    |
| C4 | $3.4 \times 10^{-16}$<br>(0.0%) | $8.7 \times 10^{-16}$<br>(0.0%)  | $3.4 \times 10^{-3}$<br>(0.0%)   | $1.1 \times 10^1$<br>(100.0%)  | $1.1 \times 10^1$    |
| C5 | $2.4 \times 10^{-5}$<br>(0.0%)  | $1.7 \times 10^{-1}$<br>(100.0%) | $8.1 \times 10^{-8}$<br>(0.0%)   | $3.6 \times 10^{-5}$<br>(0.0%) | $1.7 \times 10^{-1}$ |
| C6 | $3.9 \times 10^{-14}$<br>(0.0%) | $9.2 \times 10^{-15}$<br>(0.0%)  | $3.0 \times 10^{-2}$<br>(0.2%)   | $1.9 \times 10^1$<br>(99.8%)   | $1.9 \times 10^1$    |
| C7 | $4.9 \times 10^{-10}$<br>(0.0%) | $1.1 \times 10^{-3}$<br>(99.7%)  | $7.3 \times 10^{-7}$<br>(0.1%)   | $2.9 \times 10^{-6}$<br>(0.3%) | $1.1 \times 10^{-3}$ |

**Table S15.** The reaction enthalpy changes ( $\Delta H^\ddagger$ , in kcal/mol) in chlorination of 2-O-3-R-Indoline.

| Reactive site | N1    | C2  | C3    | C4    | C5    | C6    | C7   |
|---------------|-------|-----|-------|-------|-------|-------|------|
| $\Delta H$    | -14.4 | 7.0 | -33.3 | -25.8 | -14.6 | -26.0 | -7.2 |

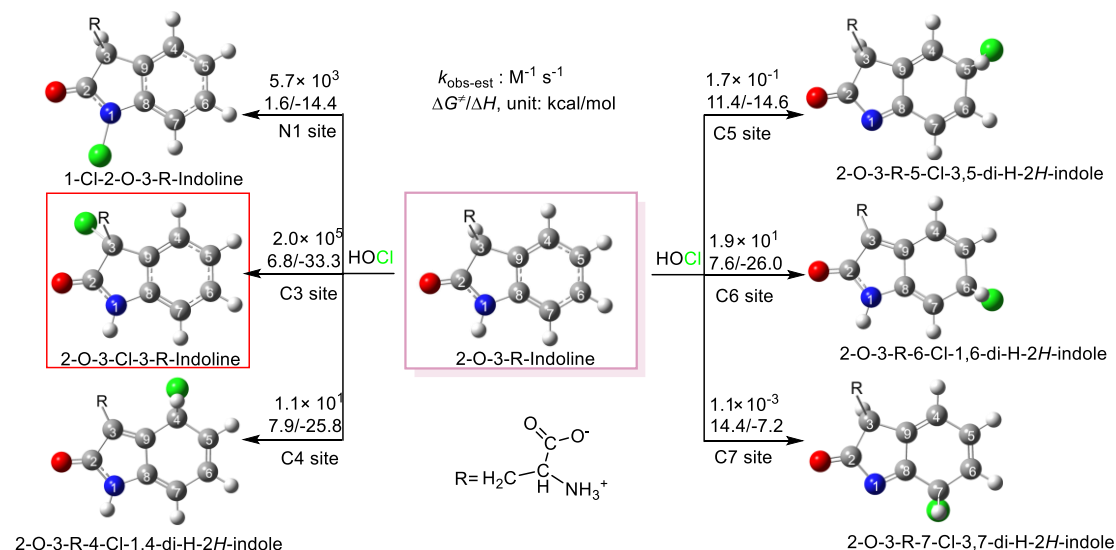

**Scheme S2.** Initial attack on the indole moiety of 2-O-3-R-Indoline by the  $\text{Cl}^+$  of HOCl.

**Table S16.** The activation free energy ( $\Delta G^\ddagger$ , in kcal/mol), estimated apparent rate constants ( $k_{\text{obs-est}}$ , in  $\text{M}^{-1} \text{s}^{-1}$ ) and contributions (c, %) of 2-O-3-Cl-3-R-Indoline with HOCl.

|    | OCIT1                        | OCIT1 <sup>-</sup>             | 2-O-3-Cl-3-R-Indoline |
|----|------------------------------|--------------------------------|-----------------------|
| N1 | 14.8/-21.1                   | 2.7/-6.6                       | $3.8 \times 10^5$     |
|    | $9.4 \times 10^1$ (0.0%)     | $3.7 \times 10^5$ (100.0%)     |                       |
| C4 | 45.7/-45.0                   | 36.1/21.8                      | $8.6 \times 10^{-18}$ |
|    | $2.0 \times 10^{-21}$ (0.0%) | $8.6 \times 10^{-18}$ (100.0%) |                       |

**Table S17.** The activation free energy ( $\Delta G^\ddagger$ , in kcal/mol), estimated apparent rate constants ( $k_{\text{obs-est}}$ , in  $\text{M}^{-1} \text{s}^{-1}$ ) and contributions (c, %) of 2-X-3-Cl-3-R-Indoline(X=OH/OCl) with HOCl.

|       | Neutral form (NH) |                            | Anion form (N <sup>-</sup> ) |                          | $k_{\text{obs-est}}$ |
|-------|-------------------|----------------------------|------------------------------|--------------------------|----------------------|
| X=OH  | 12.1/-15.3        | $9.0 \times 10^3$ (100.0%) | --                           | --                       | $9.0 \times 10^3$    |
| X=OCl | 15.9/-15.3        | $1.5 \times 10^1$ (92.3%)  | 0.0/-21.0                    | $1.3 \times 10^0$ (7.7%) | $1.6 \times 10^1$    |

**Table S18.** The APT charge of 1,3-di-Cl-2-O-3-R-Indoline, **Int 3<sup>-</sup>** (X=O<sup>-</sup>/OCl), **Int 3<sup>2-</sup>**, **Int 6**, and **Int 6<sup>-</sup>**.

|    | 1,3-di-Cl-2-O-3-R-Indoline | <b>Int 3<sup>-</sup></b><br>(X=O <sup>-</sup> ) | <b>Int 3<sup>2-</sup></b><br>(X=O <sup>-</sup> ) | <b>Int 3<sup>-</sup></b><br>(X=OCl) | <b>Int 6</b> | <b>Int 6<sup>-</sup></b> |
|----|----------------------------|-------------------------------------------------|--------------------------------------------------|-------------------------------------|--------------|--------------------------|
| N1 | -0.860                     | -0.326                                          | -0.602                                           | -0.708                              | -1.219       | -1.741                   |
| C2 | 1.576                      | 1.707                                           | 1.823                                            | 1.805                               | 1.693        | 1.943                    |
| C3 | 0.529                      | 0.578                                           | 0.785                                            | 0.670                               | 1.428        | 1.431                    |
| C4 | 0.060                      | -0.093                                          | 0.296                                            | 0.071                               | -0.005       | 0.105                    |
| C5 | -0.207                     | -0.118                                          | -0.704                                           | -0.247                              | -0.208       | -0.404                   |
| C6 | 0.070                      | 0.003                                           | 0.378                                            | 0.064                               | 0.124        | 0.247                    |
| C7 | -0.215                     | -0.127                                          | -0.393                                           | -0.188                              | -0.272       | -0.353                   |

**Table S19.** The activation free energy ( $\Delta G^\ddagger$ , in kcal/mol) and reaction enthalpy changes ( $\Delta H$ , in kcal/mol) in chlorination of 1,3-di-Cl-2-O-3-R-Indoline.

| Reactive site                | C4         | C5        | C6         | C7        |
|------------------------------|------------|-----------|------------|-----------|
| $\Delta G^\ddagger/\Delta H$ | 47.9/-43.3 | 30.4/19.3 | 42.7/-52.0 | 36.3/22.6 |

**Table S20.** The activation free energy ( $\Delta G^\ddagger$ , in kcal/mol), estimated apparent rate constants ( $k_{\text{obs-est}}$ , in  $\text{M}^{-1} \text{s}^{-1}$ ) and contributions (c, %) of **Int 3** (X= O<sup>-</sup>/OCl) with HOCl.

|                  | Anion form (N <sup>-</sup> ) |          | Anion form (N <sup>2-</sup> ) |            | <b>Int 3</b>                  |                      |
|------------------|------------------------------|----------|-------------------------------|------------|-------------------------------|----------------------|
| X=O <sup>-</sup> | C5                           | 20.5/1.3 | $5.9 \times 10^{-3}$ (0.0%)   | 3.9/-30.7  | $2.5 \times 10^2$ (100.0%)    | $2.5 \times 10^2$    |
|                  | C7                           | 21.5/8.3 | $1.1 \times 10^{-3}$ (0.0%)   | 3.5/-27.0  | $2.5 \times 10^2$ (100.0%)    | $2.5 \times 10^2$    |
| X=OCl            | C5                           | --       | --                            | 18.7/-15.3 | $1.3 \times 10^{-1}$ (100.0%) | $1.3 \times 10^{-1}$ |
|                  | C7                           | --       | --                            | 19.3/-11.2 | $4.8 \times 10^{-2}$ (100.0%) | $4.8 \times 10^{-2}$ |



**Table S21.** The activation free energy ( $\Delta G^\ddagger$ , in kcal/mol), estimated apparent rate constants ( $k_{\text{obs-est}}$ , in  $\text{M}^{-1} \text{s}^{-1}$ ) and contributions ( $c$ , %) of 2-X-3-Y-3-R-Indoline(X=OH/OCl, Y=OH/OCl) with HOCl.

|             | Neutral form (NH) |                            | Anion form (N <sup>-</sup> ) |                             | $k_{\text{obs-est}}$ |
|-------------|-------------------|----------------------------|------------------------------|-----------------------------|----------------------|
| X=OH Y=OH   | 13.0/-17.5        | $2.0 \times 10^3$ (100.0%) | --                           | --                          | $2.0 \times 10^3$    |
| X=OCl Y=OH  | 16.4/-16.0        | $6.3 \times 10^0$ (92.7%)  | 0.5/-22.1                    | $5.0 \times 10^{-1}$ (7.3%) | $6.8 \times 10^0$    |
| X=OH Y=OCl  | 13.3/-16.3        | $1.2 \times 10^3$ (100.0%) | 0.5/-26.7                    | $1.9 \times 10^{-1}$ (0.0%) | $1.2 \times 10^3$    |
| X=OCl Y=OCl | 16.4/-15.8        | $6.3 \times 10^0$ (60.8%)  | -0.5/-24.8                   | $4.1 \times 10^0$ (39.2%)   | $1.0 \times 10^1$    |

**Table S22.** The activation free energy ( $\Delta G^\ddagger$ , in kcal/mol), estimated apparent rate constants ( $k_{\text{obs-est}}$ , in  $\text{M}^{-1} \text{s}^{-1}$ ) and contributions ( $c$ , %) of **Int 6** with HOCl.

|    | Neutral form (NH) |                              | Anion form (N <sup>-</sup> ) |                                | <b>Int 6</b>          |
|----|-------------------|------------------------------|------------------------------|--------------------------------|-----------------------|
| C5 | 29.7/14.8         | $1.2 \times 10^{-9}$ (42.6%) | 17.9/-9.7                    | $1.6 \times 10^{-9}$ (57.4%)   | $2.7 \times 10^{-9}$  |
| C7 | 38.9/27.2         | $2.3 \times 10^{-16}$ (0.0%) | 22.0/-2.7                    | $1.5 \times 10^{-12}$ (100.0%) | $1.5 \times 10^{-12}$ |

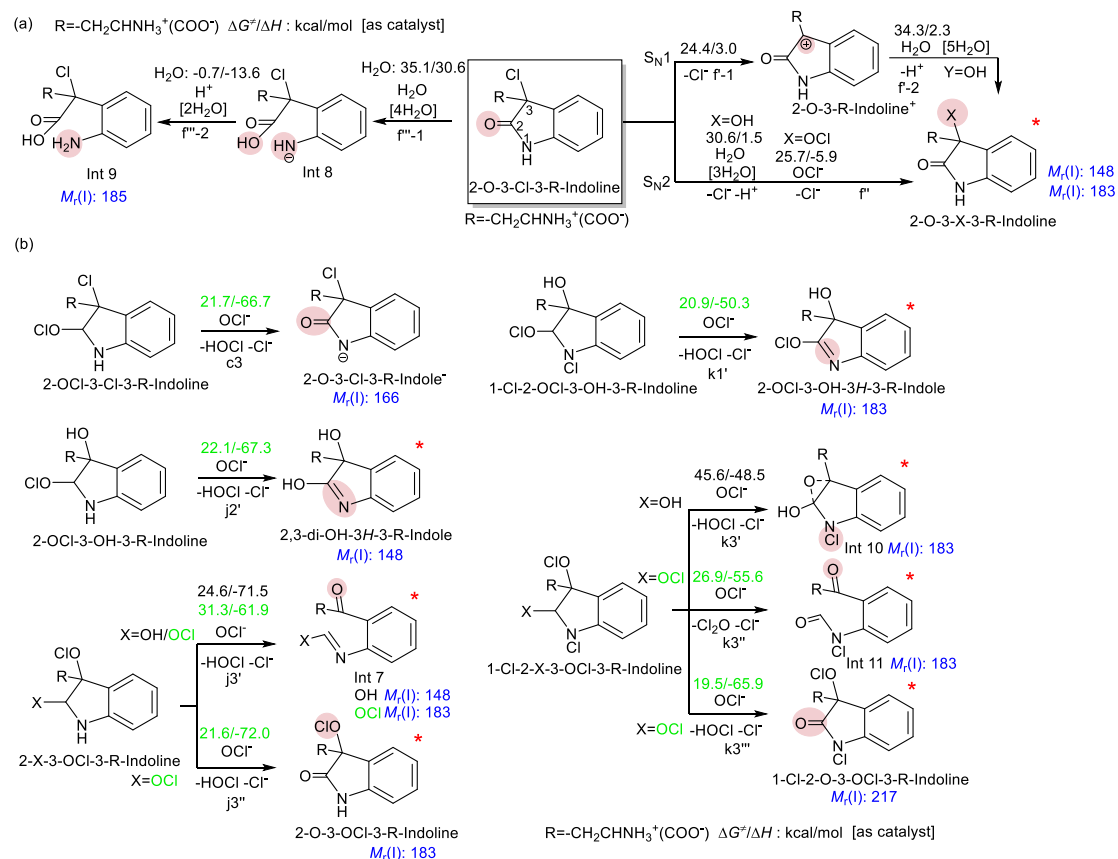

**Scheme S3.** Formation of minor transformation products of (a) The nucleophilic substitution of 2-O-3-Cl-3-R-Indoline; (b) The elimination reactions of 2-O-3-Cl-3-R-Indoline, 2-O-3-OH-3-R-Indoline, 2-X-3-OCl-3-R-Indoline, 1-Cl-2-O-3-OH-3-R-Indoline, and 1-Cl-2-X-3-OCl-3-R-Indoline.

## Standard orientation of TS-T1-c-N1

Cartesian coordinates of the transition state optimized at the M06-2X/6-311G(d) level:

Standard orientation of transition state of TS-T1-c-N1

State=1-A

Charge = 0 Multiplicity = 1

Lowest Harmonic Vibrational Frequency (LHVF) = -151.1 cm<sup>-1</sup>

Standard orientation:

| Center<br>Number | Atomic<br>Number | Atomic<br>Type | Coordinates (Angstroms) |           |           |
|------------------|------------------|----------------|-------------------------|-----------|-----------|
|                  |                  |                | X                       | Y         | Z         |
| 1                | 1                | 0              | 0.878229                | -0.754484 | 0.928646  |
| 2                | 8                | 0              | 3.364805                | -0.006132 | 2.218114  |
| 3                | 1                | 0              | 3.297702                | 0.948740  | 2.100549  |
| 4                | 17               | 0              | 2.458220                | -0.533408 | -1.249718 |
| 5                | 8                | 0              | 1.183561                | -0.998938 | 1.867081  |
| 6                | 1                | 0              | 1.211967                | -1.961790 | 1.951076  |
| 7                | 1                | 0              | 2.197001                | -0.560266 | 2.034276  |
| 8                | 8                | 0              | 4.215049                | -0.916286 | -1.830007 |
| 9                | 1                | 0              | 4.063693                | -0.348789 | 1.587620  |
| 10               | 1                | 0              | 4.505804                | -0.112175 | -2.277646 |
| 11               | 8                | 0              | 5.221875                | -0.926150 | 0.634565  |
| 12               | 1                | 0              | 4.918167                | -0.936503 | -0.305988 |
| 13               | 1                | 0              | 5.378076                | -1.842995 | 0.883431  |
| 14               | 6                | 0              | 0.170852                | 1.186628  | -0.283700 |
| 15               | 6                | 0              | -1.204369               | 1.361408  | -0.581767 |
| 16               | 6                | 0              | -1.810780               | 2.604706  | -0.340131 |
| 17               | 6                | 0              | -1.038529               | 3.635525  | 0.172006  |
| 18               | 6                | 0              | 0.328421                | 3.449022  | 0.455093  |
| 19               | 6                | 0              | 0.946995                | 2.228027  | 0.234522  |
| 20               | 6                | 0              | -0.582775               | -0.740531 | -1.064234 |
| 21               | 6                | 0              | -1.671186               | 0.092112  | -1.086440 |
| 22               | 1                | 0              | -2.865273               | 2.758786  | -0.552392 |
| 23               | 1                | 0              | -1.491189               | 4.602632  | 0.360512  |
| 24               | 1                | 0              | 0.905177                | 4.275432  | 0.855200  |
| 25               | 1                | 0              | 1.998375                | 2.078700  | 0.458163  |
| 26               | 1                | 0              | -0.534421               | -1.782680 | -1.355637 |
| 27               | 7                | 0              | 0.536918                | -0.120408 | -0.548128 |
| 28               | 6                | 0              | -3.087623               | -0.303071 | -1.374708 |
| 29               | 1                | 0              | -3.121790               | -1.100096 | -2.118807 |
| 30               | 1                | 0              | -3.661428               | 0.540357  | -1.770094 |
| 31               | 6                | 0              | -3.788395               | -0.843316 | -0.121051 |

|    |   |   |           |           |           |
|----|---|---|-----------|-----------|-----------|
| 32 | 6 | 0 | -2.992494 | -2.021056 | 0.475113  |
| 33 | 8 | 0 | -2.976383 | -3.056203 | -0.220530 |
| 34 | 8 | 0 | -2.410918 | -1.814956 | 1.564045  |
| 35 | 1 | 0 | -4.807320 | -1.150993 | -0.351587 |
| 36 | 7 | 0 | -3.879032 | 0.235377  | 0.910170  |
| 37 | 1 | 0 | -4.275717 | 1.096646  | 0.527751  |
| 38 | 1 | 0 | -4.451813 | -0.065911 | 1.700271  |
| 39 | 1 | 0 | -2.944767 | 0.431138  | 1.281198  |

## Standard orientation of TS-T1-s-C2

Cartesian coordinates of the transition state optimized at the M06-2X/6-311G(d) level:

Standard orientation of transition state of TS-T1-s-C2

State=1-A

Charge = 0 Multiplicity = 1

Lowest Harmonic Vibrational Frequency (LHVF) = -328.02 cm<sup>-1</sup>

Standard orientation:

| Center Number | Atomic Number | Atomic Type | Coordinates (Angstroms) |           |           |
|---------------|---------------|-------------|-------------------------|-----------|-----------|
|               |               |             | X                       | Y         | Z         |
| 1             | 8             | 0           | 3.120945                | -0.038275 | -2.423166 |
| 2             | 1             | 0           | 3.586604                | -0.476388 | -1.673438 |
| 3             | 1             | 0           | 3.809030                | 0.348100  | -2.975197 |
| 4             | 8             | 0           | 4.415398                | -1.047038 | -0.261244 |
| 5             | 1             | 0           | 4.219748                | -0.319359 | 0.357517  |
| 6             | 1             | 0           | 3.833086                | -1.788636 | 0.042671  |
| 7             | 8             | 0           | 2.657196                | -2.732321 | 0.725799  |
| 8             | 1             | 0           | 2.407482                | -3.603796 | 0.399705  |
| 9             | 17            | 0           | 1.159570                | -1.487093 | -0.171114 |
| 10            | 8             | 0           | 3.442682                | 0.941242  | 1.421329  |
| 11            | 1             | 0           | 3.027113                | 1.417556  | 0.663228  |
| 12            | 1             | 0           | 4.053233                | 1.550960  | 1.847758  |
| 13            | 8             | 0           | 2.464746                | 2.044653  | -0.787210 |
| 14            | 1             | 0           | 2.584397                | 1.323273  | -1.438336 |
| 15            | 1             | 0           | 1.548619                | 2.373985  | -0.864973 |
| 16            | 8             | 0           | 2.193379                | -1.095212 | 2.852247  |
| 17            | 1             | 0           | 2.286571                | -1.812671 | 2.195170  |
| 18            | 1             | 0           | 2.568941                | -0.315339 | 2.410197  |
| 19            | 6             | 0           | -2.165809               | -1.390046 | -1.016630 |
| 20            | 6             | 0           | -2.046268               | -0.672408 | 0.215970  |
| 21            | 6             | 0           | -3.030430               | -0.837362 | 1.229731  |

|    |   |   |           |           |           |
|----|---|---|-----------|-----------|-----------|
| 22 | 6 | 0 | -4.086229 | -1.665372 | 0.977095  |
| 23 | 6 | 0 | -4.191525 | -2.360762 | -0.265405 |
| 24 | 6 | 0 | -3.254131 | -2.248548 | -1.260765 |
| 25 | 6 | 0 | -0.212797 | -0.287589 | -1.091405 |
| 26 | 6 | 0 | -0.870332 | 0.072577  | 0.142312  |
| 27 | 1 | 0 | -2.929373 | -0.324198 | 2.179967  |
| 28 | 1 | 0 | -4.855003 | -1.814059 | 1.724876  |
| 29 | 1 | 0 | -5.045109 | -3.010844 | -0.419887 |
| 30 | 1 | 0 | -3.337712 | -2.791572 | -2.193640 |
| 31 | 1 | 0 | -0.905181 | -1.532925 | -2.687129 |
| 32 | 1 | 0 | 0.425370  | 0.389549  | -1.645304 |
| 33 | 7 | 0 | -1.108754 | -1.097617 | -1.797666 |
| 34 | 6 | 0 | -0.307473 | 1.065357  | 1.102950  |
| 35 | 1 | 0 | 0.761590  | 1.174219  | 0.918210  |
| 36 | 1 | 0 | -0.434702 | 0.725048  | 2.134080  |
| 37 | 6 | 0 | -0.940226 | 2.457070  | 0.930289  |
| 38 | 6 | 0 | -1.103820 | 2.816090  | -0.562930 |
| 39 | 8 | 0 | -0.041004 | 3.030841  | -1.188686 |
| 40 | 8 | 0 | -2.263283 | 2.814524  | -1.012745 |
| 41 | 1 | 0 | -0.317815 | 3.193697  | 1.433756  |
| 42 | 7 | 0 | -2.289990 | 2.513815  | 1.565281  |
| 43 | 1 | 0 | -2.308991 | 2.061984  | 2.482533  |
| 44 | 1 | 0 | -2.587653 | 3.485365  | 1.679588  |
| 45 | 1 | 0 | -2.977951 | 2.071890  | 0.946409  |

### Standard orientation of TS-T1-s-C3

Cartesian coordinates of the transition state optimized at the M06-2X/6-311G(d) level:

Standard orientation of transition state of TS-T1-s-C3

State=1-A

Charge = 0 Multiplicity = 1

Lowest Harmonic Vibrational Frequency (LHVF) = -280.29 cm<sup>-1</sup>

Standard orientation:

| Center Number | Atomic Number | Atomic Type | Coordinates (Angstroms) |           |           |
|---------------|---------------|-------------|-------------------------|-----------|-----------|
|               |               |             | X                       | Y         | Z         |
| 1             | 8             | 0           | -2.880462               | 1.136885  | -2.329384 |
| 2             | 1             | 0           | -3.041705               | 0.220994  | -2.012350 |
| 3             | 1             | 0           | -3.657669               | 1.383295  | -2.841739 |
| 4             | 8             | 0           | -3.531094               | -1.287005 | -1.259466 |
| 5             | 1             | 0           | -3.595442               | -0.943803 | -0.347796 |

|    |    |   |           |           |           |
|----|----|---|-----------|-----------|-----------|
| 6  | 1  | 0 | -2.920529 | -2.051140 | -1.216275 |
| 7  | 8  | 0 | -1.809288 | -3.298838 | -0.650229 |
| 8  | 1  | 0 | -1.286442 | -3.951490 | -1.129816 |
| 9  | 17 | 0 | -0.486344 | -1.817620 | -0.197190 |
| 10 | 8  | 0 | -3.577333 | -0.087941 | 1.238964  |
| 11 | 1  | 0 | -3.418530 | 0.823800  | 0.898354  |
| 12 | 1  | 0 | -4.485291 | -0.109516 | 1.560084  |
| 13 | 8  | 0 | -3.161932 | 2.334043  | 0.132210  |
| 14 | 1  | 0 | -3.008506 | 2.011742  | -0.779256 |
| 15 | 1  | 0 | -2.296958 | 2.594311  | 0.506911  |
| 16 | 8  | 0 | -3.001666 | -2.806270 | 1.742001  |
| 17 | 1  | 0 | -2.585067 | -3.145328 | 0.928315  |
| 18 | 1  | 0 | -3.020574 | -1.843859 | 1.639330  |
| 19 | 6  | 0 | 2.726085  | -0.817205 | 0.860885  |
| 20 | 6  | 0 | 2.067363  | -0.473406 | -0.326595 |
| 21 | 6  | 0 | 2.737969  | -0.588838 | -1.542135 |
| 22 | 6  | 0 | 4.049229  | -1.049663 | -1.526996 |
| 23 | 6  | 0 | 4.683778  | -1.398575 | -0.326704 |
| 24 | 6  | 0 | 4.029130  | -1.291077 | 0.894514  |
| 25 | 6  | 0 | 0.684623  | -0.125069 | 1.459796  |
| 26 | 6  | 0 | 0.697782  | -0.076837 | 0.026575  |
| 27 | 1  | 0 | 2.246112  | -0.328253 | -2.473620 |
| 28 | 1  | 0 | 4.592560  | -1.143927 | -2.459689 |
| 29 | 1  | 0 | 5.705642  | -1.757578 | -0.350235 |
| 30 | 1  | 0 | 4.510778  | -1.556707 | 1.827732  |
| 31 | 1  | 0 | 2.021692  | -0.790898 | 2.892386  |
| 32 | 1  | 0 | -0.134650 | 0.122351  | 2.121385  |
| 33 | 7  | 0 | 1.829713  | -0.591326 | 1.916885  |
| 34 | 6  | 0 | -0.139683 | 0.893295  | -0.769685 |
| 35 | 1  | 0 | -1.176402 | 0.819967  | -0.440510 |
| 36 | 1  | 0 | -0.119014 | 0.605279  | -1.823902 |
| 37 | 6  | 0 | 0.271697  | 2.359261  | -0.626689 |
| 38 | 6  | 0 | 0.323563  | 2.756890  | 0.859332  |
| 39 | 8  | 0 | -0.788797 | 2.866940  | 1.424711  |
| 40 | 8  | 0 | 1.452874  | 2.862280  | 1.373981  |
| 41 | 1  | 0 | -0.441443 | 2.982789  | -1.164485 |
| 42 | 7  | 0 | 1.616815  | 2.599965  | -1.228357 |
| 43 | 1  | 0 | 1.723454  | 2.141161  | -2.135996 |
| 44 | 1  | 0 | 1.780751  | 3.601122  | -1.354830 |
| 45 | 1  | 0 | 2.341752  | 2.261342  | -0.587556 |

---

## Standard orientation of TS-T1-s-C4

Cartesian coordinates of the transition state optimized at the M06-2X/6-311G(d) level:

Standard orientation of transition state of TS-T1-s-C4

State=1-A

Charge = 0 Multiplicity = 1

Lowest Harmonic Vibrational Frequency (LHVF) = -388.33 cm<sup>-1</sup>

Standard orientation:

| Center<br>Number | Atomic<br>Number | Atomic<br>Type | Coordinates (Angstroms) |           |           |
|------------------|------------------|----------------|-------------------------|-----------|-----------|
|                  |                  |                | X                       | Y         | Z         |
| 1                | 8                | 0              | -1.010882               | -2.534543 | 0.546910  |
| 2                | 1                | 0              | -1.650327               | -2.339824 | -0.185139 |
| 3                | 1                | 0              | -1.124806               | -3.468913 | 0.757465  |
| 4                | 8                | 0              | -3.007588               | -2.167111 | -1.206876 |
| 5                | 1                | 0              | -3.634053               | -1.887668 | -0.511913 |
| 6                | 1                | 0              | -2.896245               | -1.364333 | -1.771828 |
| 7                | 8                | 0              | -2.878021               | 0.202664  | -2.388204 |
| 8                | 1                | 0              | -2.357558               | 0.478017  | -3.150825 |
| 9                | 17               | 0              | -1.551662               | 0.667013  | -0.786728 |
| 10               | 8                | 0              | -4.510277               | -1.057526 | 0.829754  |
| 11               | 1                | 0              | -3.796644               | -1.008619 | 1.501119  |
| 12               | 1                | 0              | -5.235344               | -1.557969 | 1.217253  |
| 13               | 8                | 0              | -2.401476               | -1.229969 | 2.504806  |
| 14               | 1                | 0              | -1.816526               | -1.688769 | 1.867390  |
| 15               | 1                | 0              | -1.907372               | -0.482580 | 2.856324  |
| 16               | 8                | 0              | -4.920180               | 1.091831  | -0.888415 |
| 17               | 1                | 0              | -4.210964               | 0.890824  | -1.531800 |
| 18               | 1                | 0              | -4.843774               | 0.393638  | -0.218105 |
| 19               | 6                | 0              | 1.552928                | 2.509832  | 0.129964  |
| 20               | 6                | 0              | 1.047147                | 1.181892  | 0.068667  |
| 21               | 6                | 0              | -0.198334               | 0.880059  | 0.739618  |
| 22               | 6                | 0              | -0.782427               | 1.945546  | 1.520915  |
| 23               | 6                | 0              | -0.262337               | 3.212812  | 1.536824  |
| 24               | 6                | 0              | 0.930798                | 3.511204  | 0.837954  |
| 25               | 6                | 0              | 2.915202                | 1.317896  | -1.147483 |
| 26               | 6                | 0              | 1.904166                | 0.436397  | -0.754127 |
| 27               | 1                | 0              | -0.329085               | -0.123676 | 1.132105  |
| 28               | 1                | 0              | -0.753591               | 3.997003  | 2.097652  |
| 29               | 1                | 0              | 1.345671                | 4.512958  | 0.860500  |
| 30               | 1                | 0              | 3.291109                | 3.351356  | -0.774667 |
| 31               | 1                | 0              | 3.767314                | 1.126216  | -1.783233 |

|    |   |   |           |           |           |
|----|---|---|-----------|-----------|-----------|
| 32 | 7 | 0 | 2.706105  | 2.539859  | -0.625819 |
| 33 | 6 | 0 | 1.783148  | -0.994958 | -1.187654 |
| 34 | 1 | 0 | 2.243267  | -1.113942 | -2.168849 |
| 35 | 1 | 0 | 0.729235  | -1.269105 | -1.288425 |
| 36 | 6 | 0 | 2.473217  | -1.987578 | -0.250360 |
| 37 | 6 | 0 | 3.931448  | -1.573690 | 0.026325  |
| 38 | 8 | 0 | 4.667818  | -1.521883 | -0.980862 |
| 39 | 8 | 0 | 4.225275  | -1.304963 | 1.210486  |
| 40 | 1 | 0 | 2.447942  | -2.983011 | -0.693013 |
| 41 | 7 | 0 | 1.727974  | -2.071221 | 1.037659  |
| 42 | 1 | 0 | 0.713138  | -2.221318 | 0.870929  |
| 43 | 1 | 0 | 2.091389  | -2.832022 | 1.612996  |
| 44 | 1 | 0 | 1.867824  | -1.213371 | 1.577228  |
| 45 | 1 | 0 | -1.687978 | 1.720959  | 2.073669  |

## Standard orientation of TS-T1-s-C5

Cartesian coordinates of the transition state optimized at the M06-2X/6-311G(d) level:

Standard orientation of transition state of TS-T1-s-C5

State=1-A

Charge = 0 Multiplicity = 1

Lowest Harmonic Vibrational Frequency (LHVF) = -348.64 cm<sup>-1</sup>

Standard orientation:

| Center Number | Atomic Number | Atomic Type | Coordinates (Angstroms) |           |           |
|---------------|---------------|-------------|-------------------------|-----------|-----------|
|               |               |             | X                       | Y         | Z         |
| 1             | 8             | 0           | 3.684311                | 2.789118  | -0.047541 |
| 2             | 1             | 0           | 4.203597                | 2.072892  | -0.481601 |
| 3             | 1             | 0           | 4.294521                | 3.523601  | 0.077390  |
| 4             | 8             | 0           | 5.182123                | 0.760764  | -1.055361 |
| 5             | 1             | 0           | 5.115413                | 0.201700  | -0.259181 |
| 6             | 1             | 0           | 4.575570                | 0.338531  | -1.715891 |
| 7             | 8             | 0           | 3.437350                | -0.556687 | -2.515255 |
| 8             | 1             | 0           | 2.962198                | -0.278559 | -3.305171 |
| 9             | 17            | 0           | 2.039504                | -0.011480 | -0.954170 |
| 10            | 8             | 0           | 4.676364                | -0.723750 | 1.259631  |
| 11            | 1             | 0           | 4.218787                | 0.022982  | 1.704959  |
| 12            | 1             | 0           | 5.483580                | -0.895040 | 1.755784  |
| 13            | 8             | 0           | 3.616279                | 1.513734  | 2.327470  |
| 14            | 1             | 0           | 3.547357                | 2.047905  | 1.504691  |
| 15            | 1             | 0           | 2.748031                | 1.510708  | 2.742143  |

|    |   |   |           |           |           |
|----|---|---|-----------|-----------|-----------|
| 16 | 8 | 0 | 4.193323  | -2.518166 | -0.838783 |
| 17 | 1 | 0 | 3.874213  | -1.942648 | -1.560327 |
| 18 | 1 | 0 | 4.263898  | -1.935474 | -0.066671 |
| 19 | 6 | 0 | -1.341977 | -0.340180 | 0.042731  |
| 20 | 6 | 0 | -0.409927 | 0.652987  | -0.074731 |
| 21 | 6 | 0 | 0.854024  | 0.525473  | 0.609200  |
| 22 | 6 | 0 | 1.032486  | -0.574956 | 1.548154  |
| 23 | 6 | 0 | 0.107384  | -1.556067 | 1.693172  |
| 24 | 6 | 0 | -1.081395 | -1.440916 | 0.926905  |
| 25 | 6 | 0 | -3.089232 | -1.741880 | -0.021566 |
| 26 | 6 | 0 | -2.644442 | -0.573177 | -0.550529 |
| 27 | 1 | 0 | 1.353973  | 1.456122  | 0.858058  |
| 28 | 1 | 0 | 0.252816  | -2.395182 | 2.361895  |
| 29 | 1 | 0 | -2.237034 | -3.121208 | 1.375011  |
| 30 | 1 | 0 | -4.010544 | -2.278572 | -0.188836 |
| 31 | 7 | 0 | -2.137505 | -2.254176 | 0.861437  |
| 32 | 6 | 0 | -3.366619 | 0.332380  | -1.500682 |
| 33 | 1 | 0 | -3.910492 | -0.252617 | -2.242044 |
| 34 | 1 | 0 | -2.651152 | 0.960911  | -2.036740 |
| 35 | 6 | 0 | -4.397975 | 1.217951  | -0.799071 |
| 36 | 6 | 0 | -5.452612 | 0.372531  | -0.054939 |
| 37 | 8 | 0 | -6.108663 | -0.406201 | -0.775978 |
| 38 | 8 | 0 | -5.529058 | 0.531811  | 1.181414  |
| 39 | 1 | 0 | -4.889023 | 1.861526  | -1.528109 |
| 40 | 7 | 0 | -3.723659 | 2.117007  | 0.186256  |
| 41 | 1 | 0 | -2.938262 | 2.621029  | -0.231767 |
| 42 | 1 | 0 | -4.386403 | 2.796281  | 0.563520  |
| 43 | 1 | 0 | -3.382515 | 1.571930  | 0.982633  |
| 44 | 1 | 0 | 1.966245  | -0.614888 | 2.096825  |
| 45 | 1 | 0 | -0.572710 | 1.513536  | -0.716157 |

## Standard orientation of TS-T1-s-C6

Cartesian coordinates of the transition state optimized at the M06-2X/6-311G(d) level:

Standard orientation of transition state of TS-T1-s-C6

State=1-A

Charge = 0 Multiplicity = 1

Lowest Harmonic Vibrational Frequency (LHVF) = -374.57 cm<sup>-1</sup>

Standard orientation:

| Center<br>Number | Atomic<br>Number | Atomic<br>Type | Coordinates (Angstroms) |   |   |
|------------------|------------------|----------------|-------------------------|---|---|
|                  |                  |                | X                       | Y | Z |



---

|    |    |   |           |           |           |
|----|----|---|-----------|-----------|-----------|
| 1  | 8  | 0 | -4.510863 | -2.186918 | 0.813844  |
| 2  | 1  | 0 | -4.878152 | -1.385040 | 0.375893  |
| 3  | 1  | 0 | -5.253414 | -2.618516 | 1.249435  |
| 4  | 8  | 0 | -5.506205 | 0.129191  | -0.206826 |
| 5  | 1  | 0 | -5.002330 | 0.705390  | 0.397365  |
| 6  | 1  | 0 | -5.042585 | 0.202963  | -1.077509 |
| 7  | 8  | 0 | -3.961411 | 0.493765  | -2.314578 |
| 8  | 1  | 0 | -3.867546 | -0.022045 | -3.122486 |
| 9  | 17 | 0 | -2.429537 | -0.339066 | -1.071566 |
| 10 | 8  | 0 | -3.825760 | 1.566294  | 1.514410  |
| 11 | 1  | 0 | -3.510285 | 0.760761  | 1.980109  |
| 12 | 1  | 0 | -4.331433 | 2.080543  | 2.152344  |
| 13 | 8  | 0 | -3.248285 | -0.769950 | 2.728474  |
| 14 | 1  | 0 | -3.643444 | -1.377615 | 2.063734  |
| 15 | 1  | 0 | -2.349463 | -1.070947 | 2.893716  |
| 16 | 8  | 0 | -3.534024 | 2.793107  | -0.990941 |
| 17 | 1  | 0 | -3.648552 | 2.058359  | -1.623584 |
| 18 | 1  | 0 | -3.525368 | 2.372319  | -0.117238 |
| 19 | 6  | 0 | 1.055745  | -1.463953 | -1.075772 |
| 20 | 6  | 0 | -0.165294 | -1.939019 | -0.725732 |
| 21 | 6  | 0 | -1.048135 | -1.212787 | 0.175508  |
| 22 | 6  | 0 | -0.551301 | -0.027868 | 0.827426  |
| 23 | 6  | 0 | 0.664947  | 0.446714  | 0.442647  |
| 24 | 6  | 0 | 1.503058  | -0.235634 | -0.500721 |
| 25 | 6  | 0 | 2.534198  | 1.616906  | 0.214547  |
| 26 | 6  | 0 | 2.676934  | 0.516211  | -0.639708 |
| 27 | 1  | 0 | -1.753109 | -1.811006 | 0.743317  |
| 28 | 1  | 0 | 1.011669  | 2.269427  | 1.500581  |
| 29 | 1  | 0 | 3.231272  | 2.422922  | 0.396296  |
| 30 | 7  | 0 | 1.351705  | 1.578851  | 0.844152  |
| 31 | 6  | 0 | 3.893724  | 0.192618  | -1.452756 |
| 32 | 1  | 0 | 4.338441  | 1.105709  | -1.849596 |
| 33 | 1  | 0 | 3.623723  | -0.439106 | -2.302382 |
| 34 | 6  | 0 | 4.976096  | -0.502811 | -0.621322 |
| 35 | 6  | 0 | 5.357600  | 0.363451  | 0.596664  |
| 36 | 8  | 0 | 5.938705  | 1.432565  | 0.323779  |
| 37 | 8  | 0 | 5.003691  | -0.061545 | 1.717395  |
| 38 | 1  | 0 | 5.852423  | -0.701382 | -1.235636 |
| 39 | 7  | 0 | 4.472652  | -1.821228 | -0.129494 |
| 40 | 1  | 0 | 4.035640  | -2.369401 | -0.874014 |
| 41 | 1  | 0 | 5.234199  | -2.370332 | 0.273482  |
| 42 | 1  | 0 | 3.793935  | -1.667904 | 0.622220  |
| 43 | 1  | 0 | -1.169392 | 0.485697  | 1.555960  |

|    |   |   |           |           |           |
|----|---|---|-----------|-----------|-----------|
| 44 | 1 | 0 | -0.538655 | -2.865780 | -1.145120 |
| 45 | 1 | 0 | 1.691823  | -1.999306 | -1.772020 |

## Standard orientation of TS-T1-s-C7

Cartesian coordinates of the transition state optimized at the M06-2X/6-311G(d) level:

Standard orientation of transition state of TS-T1-s-C7

State=1-A

Charge = 0 Multiplicity = 1

Lowest Harmonic Vibrational Frequency (LHVF) = -355.47 cm<sup>-1</sup>

Standard orientation:

| Center<br>Number | Atomic<br>Number | Atomic<br>Type | Coordinates (Angstroms) |           |           |
|------------------|------------------|----------------|-------------------------|-----------|-----------|
|                  |                  |                | X                       | Y         | Z         |
| 1                | 8                | 0              | 4.366138                | 0.758673  | 1.825143  |
| 2                | 1                | 0              | 4.537427                | 0.126772  | 1.090849  |
| 3                | 1                | 0              | 5.165026                | 0.770215  | 2.362713  |
| 4                | 8                | 0              | 4.725714                | -1.159124 | -0.085427 |
| 5                | 1                | 0              | 3.912004                | -1.640938 | 0.137610  |
| 6                | 1                | 0              | 4.527922                | -0.679900 | -0.928888 |
| 7                | 8                | 0              | 3.862741                | 0.090998  | -2.264058 |
| 8                | 1                | 0              | 4.233170                | 0.892640  | -2.648860 |
| 9                | 17               | 0              | 2.385117                | 0.829997  | -0.891036 |
| 10               | 8                | 0              | 2.155357                | -2.199263 | 0.700451  |
| 11               | 1                | 0              | 2.266924                | -1.730978 | 1.562922  |
| 12               | 1                | 0              | 2.149497                | -3.143444 | 0.894095  |
| 13               | 8                | 0              | 2.585032                | -0.878595 | 3.000199  |
| 14               | 1                | 0              | 3.227354                | -0.207096 | 2.675500  |
| 15               | 1                | 0              | 1.818799                | -0.399338 | 3.332858  |
| 16               | 8                | 0              | 2.310569                | -2.136012 | -2.183193 |
| 17               | 1                | 0              | 2.828072                | -1.342868 | -2.413859 |
| 18               | 1                | 0              | 2.196114                | -2.090317 | -1.223594 |
| 19               | 6                | 0              | -0.113449               | 0.437361  | 0.139261  |
| 20               | 6                | 0              | -1.269990               | 1.054651  | -0.412491 |
| 21               | 6                | 0              | -1.327598               | 2.433727  | -0.468594 |
| 22               | 6                | 0              | -0.249127               | 3.219115  | 0.013096  |
| 23               | 6                | 0              | 0.863845                | 2.628913  | 0.545177  |
| 24               | 6                | 0              | 1.033014                | 1.191105  | 0.577199  |
| 25               | 6                | 0              | -1.511978               | -1.170255 | -0.506335 |
| 26               | 6                | 0              | -2.159195               | -0.013624 | -0.817062 |
| 27               | 1                | 0              | -2.200214               | 2.926497  | -0.887581 |

|    |   |   |           |           |           |
|----|---|---|-----------|-----------|-----------|
| 28 | 1 | 0 | -0.320820 | 4.297759  | -0.036880 |
| 29 | 1 | 0 | 1.680519  | 3.231398  | 0.925538  |
| 30 | 1 | 0 | 1.616084  | 0.779204  | 1.394354  |
| 31 | 1 | 0 | 0.455639  | -1.560865 | 0.316732  |
| 32 | 1 | 0 | -1.820228 | -2.195897 | -0.640319 |
| 33 | 7 | 0 | -0.277288 | -0.884165 | 0.072243  |
| 34 | 6 | 0 | -3.533079 | 0.126576  | -1.398524 |
| 35 | 1 | 0 | -3.726322 | -0.682357 | -2.103107 |
| 36 | 1 | 0 | -3.618298 | 1.067908  | -1.947642 |
| 37 | 6 | 0 | -4.636284 | 0.055694  | -0.339561 |
| 38 | 6 | 0 | -4.547483 | -1.251537 | 0.474007  |
| 39 | 8 | 0 | -4.694072 | -2.298472 | -0.188581 |
| 40 | 8 | 0 | -4.314014 | -1.135426 | 1.695654  |
| 41 | 1 | 0 | -5.612359 | 0.130282  | -0.817194 |
| 42 | 7 | 0 | -4.527556 | 1.210766  | 0.602936  |
| 43 | 1 | 0 | -4.470500 | 2.104601  | 0.109515  |
| 44 | 1 | 0 | -5.331273 | 1.235130  | 1.232994  |
| 45 | 1 | 0 | -3.699398 | 1.102844  | 1.195081  |

## Standard orientation of TS-T1-a1

Cartesian coordinates of the transition state optimized at the M06-2X/6-311G(d) level:

Standard orientation of transition state of TS-T1-a1

State=1-A

Charge = 1 Multiplicity = 1

Lowest Harmonic Vibrational Frequency (LHVF) = -946.48 cm<sup>-1</sup>

Standard orientation:

| Center Number | Atomic Number | Atomic Type | Coordinates (Angstroms) |           |           |
|---------------|---------------|-------------|-------------------------|-----------|-----------|
|               |               |             | X                       | Y         | Z         |
| 1             | 1             | 0           | -1.476518               | -2.014611 | 0.553086  |
| 2             | 8             | 0           | -2.390114               | -2.772248 | 0.546820  |
| 3             | 1             | 0           | -3.200353               | -2.198888 | 0.330229  |
| 4             | 1             | 0           | -2.274423               | -3.426062 | -0.155266 |
| 5             | 8             | 0           | -4.248991               | -1.092345 | 0.038876  |
| 6             | 1             | 0           | -5.041485               | -1.226214 | 0.570194  |
| 7             | 1             | 0           | -3.839708               | -0.253285 | 0.346508  |
| 8             | 8             | 0           | -3.049442               | 1.179986  | 0.932869  |
| 9             | 1             | 0           | -3.679935               | 1.741426  | 1.397638  |
| 10            | 6             | 0           | -0.733927               | -0.058221 | -0.522745 |
| 11            | 6             | 0           | 0.110720                | 1.014442  | -0.250903 |

|    |    |   |           |           |           |
|----|----|---|-----------|-----------|-----------|
| 12 | 6  | 0 | 0.132371  | 2.119714  | -1.081677 |
| 13 | 6  | 0 | -0.705991 | 2.107017  | -2.200282 |
| 14 | 6  | 0 | -1.530798 | 1.014995  | -2.471443 |
| 15 | 6  | 0 | -1.561357 | -0.097635 | -1.627566 |
| 16 | 6  | 0 | 0.251726  | -0.662053 | 1.361165  |
| 17 | 6  | 0 | 0.887018  | 0.666565  | 0.990334  |
| 18 | 1  | 0 | 0.775279  | 2.968128  | -0.872531 |
| 19 | 1  | 0 | -0.714664 | 2.959726  | -2.868308 |
| 20 | 1  | 0 | -2.166038 | 1.032095  | -3.348794 |
| 21 | 1  | 0 | -2.210034 | -0.944357 | -1.817203 |
| 22 | 1  | 0 | 0.490010  | -1.224230 | 2.255074  |
| 23 | 7  | 0 | -0.627380 | -1.035465 | 0.512474  |
| 24 | 6  | 0 | 2.413738  | 0.629023  | 0.841214  |
| 25 | 1  | 0 | 2.837857  | 0.265016  | 1.777464  |
| 26 | 1  | 0 | 2.762597  | 1.654510  | 0.693741  |
| 27 | 6  | 0 | 2.967141  | -0.259171 | -0.274923 |
| 28 | 6  | 0 | 2.382042  | -1.691144 | -0.272508 |
| 29 | 8  | 0 | 2.544276  | -2.315053 | 0.793887  |
| 30 | 8  | 0 | 1.790264  | -2.056783 | -1.308007 |
| 31 | 1  | 0 | 4.042403  | -0.330287 | -0.118242 |
| 32 | 7  | 0 | 2.781427  | 0.330153  | -1.637738 |
| 33 | 1  | 0 | 2.849442  | 1.350171  | -1.640992 |
| 34 | 1  | 0 | 3.492527  | -0.036547 | -2.273615 |
| 35 | 1  | 0 | 1.875775  | 0.041958  | -2.021596 |
| 36 | 1  | 0 | -2.748700 | 1.689166  | 0.170558  |
| 37 | 17 | 0 | 0.488448  | 1.802342  | 2.348197  |

## Standard orientation of TS-I-a1

Cartesian coordinates of the transition state optimized at the M06-2X/6-311G(d) level:

Standard orientation of transition state of TS-I-a1

State=1-A

Charge = 1 Multiplicity = 1

Lowest Harmonic Vibrational Frequency (LHVF) = -932.98 cm<sup>-1</sup>

Standard orientation:

| Center Number | Atomic Number | Atomic Type | Coordinates (Angstroms) |           |           |
|---------------|---------------|-------------|-------------------------|-----------|-----------|
|               |               |             | X                       | Y         | Z         |
| 1             | 1             | 0           | -1.327692               | -1.738183 | -0.765098 |
| 2             | 8             | 0           | -3.962530               | -0.475732 | 0.297115  |
| 3             | 1             | 0           | -4.225613               | 0.188760  | -0.348915 |

|    |    |   |           |           |           |
|----|----|---|-----------|-----------|-----------|
| 4  | 8  | 0 | -2.429967 | -2.201361 | -0.842924 |
| 5  | 1  | 0 | -2.469171 | -3.041258 | -0.367803 |
| 6  | 1  | 0 | -3.074088 | -1.556708 | -0.404844 |
| 7  | 8  | 0 | -2.328451 | 0.715684  | 2.118585  |
| 8  | 1  | 0 | -3.396407 | -0.019586 | 0.957576  |
| 9  | 1  | 0 | -2.202930 | 1.630709  | 1.842016  |
| 10 | 6  | 0 | 0.004281  | 0.239665  | -0.602484 |
| 11 | 6  | 0 | 1.355937  | 0.537570  | -0.446818 |
| 12 | 6  | 0 | 1.774768  | 1.849553  | -0.336863 |
| 13 | 6  | 0 | 0.799752  | 2.849528  | -0.385971 |
| 14 | 6  | 0 | -0.549236 | 2.536383  | -0.550994 |
| 15 | 6  | 0 | -0.974578 | 1.211858  | -0.669158 |
| 16 | 6  | 0 | 0.965182  | -1.753031 | -0.590669 |
| 17 | 6  | 0 | 2.096575  | -0.765790 | -0.469654 |
| 18 | 1  | 0 | 2.822359  | 2.096598  | -0.208970 |
| 19 | 1  | 0 | 1.097509  | 3.887227  | -0.295690 |
| 20 | 1  | 0 | -1.281632 | 3.333884  | -0.589662 |
| 21 | 1  | 0 | -2.020042 | 0.953476  | -0.786974 |
| 22 | 1  | 0 | 1.080073  | -2.829501 | -0.611298 |
| 23 | 7  | 0 | -0.172720 | -1.175688 | -0.676231 |
| 24 | 1  | 0 | 2.787353  | -0.861323 | -1.308663 |
| 25 | 1  | 0 | -1.467090 | 0.295565  | 2.011986  |
| 26 | 17 | 0 | 3.048112  | -1.097235 | 1.020200  |

### Standard orientation of TS-I-a1'

Cartesian coordinates of the transition state optimized at the M06-2X/6-311G(d) level:

Standard orientation of transition state of TS-I-a1'

State=1-A

Charge = 1 Multiplicity = 1

Lowest Harmonic Vibrational Frequency (LHVF) = -1053.69 cm<sup>-1</sup>

Standard orientation:

| Center<br>Number | Atomic<br>Number | Atomic<br>Type | Coordinates (Angstroms) |          |          |
|------------------|------------------|----------------|-------------------------|----------|----------|
|                  |                  |                | X                       | Y        | Z        |
| 1                | 1                | 0              | -1.270130               | 0.045741 | 0.871847 |
| 2                | 8                | 0              | -1.379795               | 1.038978 | 1.781765 |
| 3                | 1                | 0              | -0.500064               | 1.492784 | 1.762431 |
| 4                | 1                | 0              | -1.502769               | 0.638377 | 2.652100 |
| 5                | 8                | 0              | 0.887621                | 2.289247 | 1.239790 |
| 6                | 1                | 0              | 1.257971                | 2.936604 | 1.850170 |

|    |    |   |           |           |           |
|----|----|---|-----------|-----------|-----------|
| 7  | 1  | 0 | 1.607435  | 1.699889  | 0.983746  |
| 8  | 8  | 0 | -1.267086 | 2.768807  | -0.544970 |
| 9  | 1  | 0 | -0.399706 | 2.720917  | -0.113979 |
| 10 | 1  | 0 | -1.865473 | 2.333935  | 0.072824  |
| 11 | 6  | 0 | 1.140202  | -1.229280 | 0.318381  |
| 12 | 6  | 0 | 0.785863  | 0.409520  | -1.421666 |
| 13 | 6  | 0 | 2.165146  | 0.562229  | -1.478615 |
| 14 | 6  | 0 | 3.018799  | -0.156987 | -0.627153 |
| 15 | 6  | 0 | 2.519388  | -1.068511 | 0.292782  |
| 16 | 6  | 0 | -1.086377 | -0.848077 | -0.060807 |
| 17 | 6  | 0 | 0.271934  | -0.502191 | -0.504109 |
| 18 | 1  | 0 | 2.593966  | 1.256287  | -2.191496 |
| 19 | 1  | 0 | 4.088744  | -0.001282 | -0.692584 |
| 20 | 1  | 0 | 3.165689  | -1.632407 | 0.954108  |
| 21 | 17 | 0 | -2.481040 | -0.749187 | -1.117818 |
| 22 | 1  | 0 | 0.130053  | 0.980614  | -2.066586 |
| 23 | 1  | 0 | -1.680878 | -2.523815 | 1.343666  |
| 24 | 6  | 0 | -0.918517 | -1.942482 | 0.844789  |
| 25 | 7  | 0 | 0.359707  | -2.088733 | 1.108945  |
| 26 | 1  | 0 | 0.730349  | -2.711912 | 1.819757  |

## Standard orientation of TS-T1-a2

Cartesian coordinates of the transition state optimized at the M06-2X/6-311G(d) level:

Standard orientation of transition state of TS-T1-a2

State=1-A

Charge = 1 Multiplicity = 1

Lowest Harmonic Vibrational Frequency (LHVF) = -195.02 cm<sup>-1</sup>

Standard orientation:

| Center Number | Atomic Number | Atomic Type | Coordinates (Angstroms) |           |           |
|---------------|---------------|-------------|-------------------------|-----------|-----------|
|               |               |             | X                       | Y         | Z         |
| 1             | 8             | 0           | -3.396108               | -1.085040 | 1.957991  |
| 2             | 1             | 0           | -3.278581               | -0.147249 | 1.726013  |
| 3             | 1             | 0           | -2.313318               | -1.969463 | 0.984850  |
| 4             | 8             | 0           | -1.601633               | -2.307317 | 0.386936  |
| 5             | 8             | 0           | -2.817460               | 1.532477  | 1.117741  |
| 6             | 1             | 0           | -2.324964               | 1.969526  | 0.387039  |
| 7             | 1             | 0           | -3.188124               | 2.224936  | 1.674456  |
| 8             | 8             | 0           | -3.980713               | -0.087780 | -0.919445 |
| 9             | 1             | 0           | -3.807040               | 0.594868  | -0.252229 |

|    |    |   |           |           |           |
|----|----|---|-----------|-----------|-----------|
| 10 | 1  | 0 | -4.322571 | -1.294634 | 1.797686  |
| 11 | 1  | 0 | -2.046562 | -2.703585 | -0.373553 |
| 12 | 1  | 0 | -3.893055 | -0.922386 | -0.445056 |
| 13 | 6  | 0 | 0.958413  | -0.237373 | 1.260003  |
| 14 | 6  | 0 | 1.503833  | -0.823452 | 0.121603  |
| 15 | 6  | 0 | 2.846294  | -1.150608 | 0.073549  |
| 16 | 6  | 0 | 3.627729  | -0.857941 | 1.193841  |
| 17 | 6  | 0 | 3.070299  | -0.246264 | 2.316311  |
| 18 | 6  | 0 | 1.712520  | 0.076757  | 2.372918  |
| 19 | 6  | 0 | -0.809740 | -0.495047 | -0.127023 |
| 20 | 6  | 0 | 0.433469  | -0.838885 | -0.938332 |
| 21 | 1  | 0 | 3.278651  | -1.608311 | -0.809382 |
| 22 | 1  | 0 | 4.682775  | -1.102433 | 1.187633  |
| 23 | 1  | 0 | 3.700419  | -0.019717 | 3.167880  |
| 24 | 1  | 0 | 1.271116  | 0.551651  | 3.240163  |
| 25 | 1  | 0 | -1.048725 | 0.520899  | 1.631504  |
| 26 | 1  | 0 | -1.758733 | -0.228340 | -0.570581 |
| 27 | 7  | 0 | -0.421461 | -0.005901 | 1.023111  |
| 28 | 6  | 0 | 0.655545  | 0.254640  | -2.019683 |
| 29 | 1  | 0 | -0.227154 | 0.277021  | -2.660006 |
| 30 | 1  | 0 | 1.497748  | -0.080630 | -2.629668 |
| 31 | 6  | 0 | 0.925851  | 1.700793  | -1.587550 |
| 32 | 6  | 0 | -0.113668 | 2.327228  | -0.633572 |
| 33 | 8  | 0 | -1.303337 | 2.228385  | -1.021789 |
| 34 | 8  | 0 | 0.310180  | 2.841651  | 0.412420  |
| 35 | 1  | 0 | 0.912114  | 2.285834  | -2.507188 |
| 36 | 7  | 0 | 2.289967  | 1.901635  | -1.002432 |
| 37 | 1  | 0 | 3.001257  | 1.333142  | -1.469064 |
| 38 | 1  | 0 | 2.559861  | 2.883884  | -1.091955 |
| 39 | 1  | 0 | 2.301281  | 1.694132  | 0.000643  |
| 40 | 17 | 0 | 0.316081  | -2.398081 | -1.811598 |

## Standard orientation of TS-I-a2

Cartesian coordinates of the transition state optimized at the M06-2X/6-311G(d) level:

Standard orientation of transition state of TS-I-a2

State=1-A

Charge = 1 Multiplicity = 1

Lowest Harmonic Vibrational Frequency (LHVF) = -232.71 cm<sup>-1</sup>

Standard orientation:

-----

| Center | Atomic | Atomic | Coordinates (Angstroms) |
|--------|--------|--------|-------------------------|
|--------|--------|--------|-------------------------|

| Number | Number | Type | X         | Y         | Z         |
|--------|--------|------|-----------|-----------|-----------|
| 1      | 8      | 0    | 2.104544  | -2.301281 | 0.687825  |
| 2      | 1      | 0    | 2.964485  | -1.984601 | 0.343546  |
| 3      | 1      | 0    | 1.502180  | -0.849158 | 1.357443  |
| 4      | 8      | 0    | 1.072177  | 0.040039  | 1.397610  |
| 5      | 8      | 0    | 4.349353  | -1.103071 | -0.246265 |
| 6      | 1      | 0    | 4.718907  | -1.486463 | -1.049770 |
| 7      | 1      | 0    | 5.056043  | -1.108955 | 0.409512  |
| 8      | 8      | 0    | 3.448617  | 1.467242  | -0.773135 |
| 9      | 1      | 0    | 3.807532  | 0.587294  | -0.558935 |
| 10     | 6      | 0    | -1.446077 | -0.946470 | -0.399632 |
| 11     | 6      | 0    | -1.732230 | 0.411661  | -0.282955 |
| 12     | 6      | 0    | -3.018145 | 0.833545  | -0.007831 |
| 13     | 6      | 0    | -4.005961 | -0.141238 | 0.154236  |
| 14     | 6      | 0    | -3.704019 | -1.495701 | 0.025335  |
| 15     | 6      | 0    | -2.407215 | -1.927164 | -0.260476 |
| 16     | 6      | 0    | 0.569043  | 0.055241  | -0.551220 |
| 17     | 6      | 0    | -0.463852 | 1.156895  | -0.588540 |
| 18     | 1      | 0    | -3.252512 | 1.887602  | 0.088463  |
| 19     | 1      | 0    | -5.021062 | 0.160453  | 0.381907  |
| 20     | 1      | 0    | -4.488317 | -2.232191 | 0.153102  |
| 21     | 1      | 0    | -2.162413 | -2.977518 | -0.359694 |
| 22     | 1      | 0    | 0.438403  | -1.977473 | -0.678922 |
| 23     | 1      | 0    | 1.601959  | 0.187136  | -0.843849 |
| 24     | 7      | 0    | -0.059972 | -1.090313 | -0.672585 |
| 25     | 17     | 0    | -0.116754 | 2.582734  | 0.414997  |
| 26     | 1      | 0    | 2.288057  | -3.001868 | 1.321695  |
| 27     | 1      | 0    | 1.768371  | 0.679466  | 1.596114  |
| 28     | 1      | 0    | 3.113049  | 1.825008  | 0.054842  |
| 29     | 1      | 0    | -0.476841 | 1.512935  | -1.624074 |

### Standard orientation of TS-T1-a2'

Cartesian coordinates of the transition state optimized at the M06-2X/6-311G(d) level:

Standard orientation of transition state of TS-T1-a2'

State=1-A

Charge = 0 Multiplicity = 1

Lowest Harmonic Vibrational Frequency (LHVF) = -37.28 cm<sup>-1</sup>

Standard orientation:

| Center | Atomic | Atomic | Coordinates (Angstroms) |
|--------|--------|--------|-------------------------|
|--------|--------|--------|-------------------------|



| Number | Number | Type | X         | Y         | Z         |
|--------|--------|------|-----------|-----------|-----------|
| 1      | 8      | 0    | 3.630860  | -0.276474 | 0.689488  |
| 2      | 6      | 0    | -0.411753 | -1.216358 | -0.781021 |
| 3      | 6      | 0    | -0.973888 | -0.887345 | 0.446158  |
| 4      | 6      | 0    | -2.166477 | -1.466775 | 0.838906  |
| 5      | 6      | 0    | -2.772398 | -2.367222 | -0.040557 |
| 6      | 6      | 0    | -2.194310 | -2.672281 | -1.272258 |
| 7      | 6      | 0    | -0.985634 | -2.098052 | -1.670483 |
| 8      | 6      | 0    | 1.039332  | 0.267943  | 0.106880  |
| 9      | 6      | 0    | -0.100446 | 0.151749  | 1.099475  |
| 10     | 1      | 0    | -2.616260 | -1.227129 | 1.796495  |
| 11     | 1      | 0    | -3.706728 | -2.837482 | 0.240275  |
| 12     | 1      | 0    | -2.688114 | -3.372946 | -1.934284 |
| 13     | 1      | 0    | -0.523838 | -2.328538 | -2.622193 |
| 14     | 1      | 0    | 1.454500  | -0.585947 | -1.692726 |
| 15     | 1      | 0    | 1.950416  | 0.833790  | 0.236845  |
| 16     | 7      | 0    | 0.813936  | -0.493999 | -0.905415 |
| 17     | 6      | 0    | -0.786147 | 1.491146  | 1.420352  |
| 18     | 1      | 0    | -0.021227 | 2.184679  | 1.769781  |
| 19     | 1      | 0    | -1.480662 | 1.315242  | 2.245401  |
| 20     | 6      | 0    | -1.523441 | 2.171169  | 0.264568  |
| 21     | 6      | 0    | -0.698620 | 2.199526  | -1.042996 |
| 22     | 8      | 0    | 0.422902  | 2.733855  | -0.931918 |
| 23     | 8      | 0    | -1.206247 | 1.655551  | -2.042659 |
| 24     | 1      | 0    | -1.716619 | 3.197744  | 0.571293  |
| 25     | 7      | 0    | -2.858895 | 1.559446  | -0.023575 |
| 26     | 1      | 0    | -3.311225 | 1.178901  | 0.810944  |
| 27     | 1      | 0    | -3.482841 | 2.260597  | -0.428210 |
| 28     | 1      | 0    | -2.757692 | 0.821569  | -0.728605 |
| 29     | 17     | 0    | 0.633348  | -0.476157 | 2.629257  |
| 30     | 17     | 0    | 4.065333  | -0.420495 | -0.964288 |

### Standard orientation of TS-T1-b1

Cartesian coordinates of the transition state optimized at the M06-2X/6-311+G(d) level:

Standard orientation of transition state of TS-T1-b1

State=1-A

Charge = -1 Multiplicity = 1

Lowest Harmonic Vibrational Frequency (LHVF) = -441.33 cm<sup>-1</sup>

Standard orientation:

| Center<br>Number | Atomic<br>Number | Atomic<br>Type | Coordinates (Angstroms) |           |           |
|------------------|------------------|----------------|-------------------------|-----------|-----------|
|                  |                  |                | X                       | Y         | Z         |
| 1                | 1                | 0              | -1.972058               | 0.699057  | 0.321541  |
| 2                | 17               | 0              | 0.080899                | 1.533452  | 1.973202  |
| 3                | 8                | 0              | -2.821000               | 1.304512  | 0.566215  |
| 4                | 8                | 0              | 1.220963                | 2.962971  | -0.289451 |
| 5                | 6                | 0              | 2.482084                | 0.308990  | -0.873439 |
| 6                | 6                | 0              | 1.761243                | 0.017192  | 0.292770  |
| 7                | 6                | 0              | 2.277619                | -0.847870 | 1.243368  |
| 8                | 6                | 0              | 3.530670                | -1.425916 | 1.021665  |
| 9                | 6                | 0              | 4.243500                | -1.129682 | -0.139273 |
| 10               | 6                | 0              | 3.729808                | -0.258720 | -1.101202 |
| 11               | 6                | 0              | 0.717319                | 1.792936  | -0.892398 |
| 12               | 6                | 0              | 0.421214                | 0.678028  | 0.136320  |
| 13               | 1                | 0              | 1.722570                | -1.059702 | 2.151047  |
| 14               | 1                | 0              | 3.952269                | -2.099365 | 1.758499  |
| 15               | 1                | 0              | 5.218391                | -1.577041 | -0.298327 |
| 16               | 1                | 0              | 4.288567                | -0.025028 | -2.000896 |
| 17               | 1                | 0              | 2.282141                | 1.793216  | -2.275145 |
| 18               | 1                | 0              | -0.168546               | 2.029889  | -1.482799 |
| 19               | 7                | 0              | 1.735335                | 1.138687  | -1.724947 |
| 20               | 6                | 0              | -0.710716               | -0.130176 | -0.242854 |
| 21               | 1                | 0              | -1.067126               | 0.039442  | -1.259998 |
| 22               | 6                | 0              | -0.782146               | -1.551767 | 0.203258  |
| 23               | 6                | 0              | -2.229990               | -2.070696 | 0.110639  |
| 24               | 8                | 0              | -2.948865               | -1.884398 | 1.113509  |
| 25               | 8                | 0              | -2.559873               | -2.592680 | -0.981783 |
| 26               | 1                | 0              | -0.414387               | -1.681445 | 1.220269  |
| 27               | 7                | 0              | 0.063308                | -2.469547 | -0.674070 |
| 28               | 1                | 0              | 1.005266                | -2.098812 | -0.809560 |
| 29               | 1                | 0              | 0.135708                | -3.411386 | -0.284155 |
| 30               | 1                | 0              | -0.411514               | -2.546949 | -1.576801 |
| 31               | 1                | 0              | 1.314600                | 3.627110  | -0.983419 |
| 32               | 17               | 0              | -3.860300               | 1.114188  | -0.767801 |

## Standard orientation of TS-T1-b2

Cartesian coordinates of the transition state optimized at the M06-2X/6-311+G(d) level:

Standard orientation of transition state of TS-T1-b2

State=1-A

Charge = -1 Multiplicity = 1

Lowest Harmonic Vibrational Frequency (LHVF) =  $-182.42 \text{ cm}^{-1}$

Standard orientation:

| Center<br>Number | Atomic<br>Number | Atomic<br>Type | Coordinates (Angstroms) |           |           |
|------------------|------------------|----------------|-------------------------|-----------|-----------|
|                  |                  |                | X                       | Y         | Z         |
| 1                | 17               | 0              | 1.207531                | 3.313701  | 0.283207  |
| 2                | 8                | 0              | -0.768839               | -2.192633 | -1.683222 |
| 3                | 8                | 0              | -0.850956               | 1.882701  | -1.914461 |
| 4                | 6                | 0              | 1.818130                | -0.059904 | -0.815851 |
| 5                | 6                | 0              | 1.221317                | 0.200026  | 0.451666  |
| 6                | 6                | 0              | 1.830193                | -0.255755 | 1.646247  |
| 7                | 6                | 0              | 2.980614                | -0.989877 | 1.544443  |
| 8                | 6                | 0              | 3.548307                | -1.269218 | 0.268153  |
| 9                | 6                | 0              | 2.993544                | -0.825904 | -0.909050 |
| 10               | 6                | 0              | -0.196078               | 0.852323  | -1.252593 |
| 11               | 6                | 0              | 0.064085                | 0.946709  | 0.219496  |
| 12               | 1                | 0              | 1.380062                | -0.030468 | 2.607712  |
| 13               | 1                | 0              | 3.472607                | -1.367727 | 2.432069  |
| 14               | 1                | 0              | 4.458802                | -1.857028 | 0.228381  |
| 15               | 1                | 0              | 3.440691                | -1.047002 | -1.870483 |
| 16               | 1                | 0              | 1.133184                | 0.114122  | -2.740291 |
| 17               | 1                | 0              | -0.779603               | -0.095793 | -1.324257 |
| 18               | 7                | 0              | 1.102534                | 0.520105  | -1.810680 |
| 19               | 17               | 0              | -0.101681               | -2.945809 | -0.308464 |
| 20               | 1                | 0              | -1.795026               | 1.786774  | -1.688899 |
| 21               | 6                | 0              | -0.984408               | 1.355300  | 1.198630  |
| 22               | 1                | 0              | -1.443470               | 2.283109  | 0.858637  |
| 23               | 1                | 0              | -0.515888               | 1.547675  | 2.165382  |
| 24               | 6                | 0              | -2.121571               | 0.347526  | 1.392656  |
| 25               | 6                | 0              | -2.988260               | 0.030839  | 0.151583  |
| 26               | 8                | 0              | -3.164173               | 0.969610  | -0.660159 |
| 27               | 8                | 0              | -3.473806               | -1.115844 | 0.102346  |
| 28               | 1                | 0              | -2.796691               | 0.773392  | 2.137503  |
| 29               | 7                | 0              | -1.633699               | -0.937507 | 1.976097  |
| 30               | 1                | 0              | -1.116833               | -0.781504 | 2.845122  |
| 31               | 1                | 0              | -2.429830               | -1.550566 | 2.168523  |
| 32               | 1                | 0              | -1.022328               | -1.450403 | 1.323733  |

### Standard orientation of TS-T1-*tautomerize1*

Cartesian coordinates of the transition state optimized at the M06-2X/6-311G(d) level:

Standard orientation of transition state of TS-T1-tautomerize1

State=1-A

Charge = 0 Multiplicity = 1

Lowest Harmonic Vibrational Frequency (LHVF) = -752.83 cm<sup>-1</sup>

Standard orientation:

| Center<br>Number | Atomic<br>Number | Atomic<br>Type | Coordinates (Angstroms) |           |           |
|------------------|------------------|----------------|-------------------------|-----------|-----------|
|                  |                  |                | X                       | Y         | Z         |
| 1                | 1                | 0              | 2.390955                | 2.037988  | 0.289671  |
| 2                | 1                | 0              | 0.222549                | 2.802994  | -2.274389 |
| 3                | 8                | 0              | 0.300116                | 2.817118  | -1.309712 |
| 4                | 1                | 0              | 0.043634                | 1.804386  | -0.907962 |
| 5                | 8                | 0              | 2.657558                | 2.675037  | -0.412889 |
| 6                | 1                | 0              | 2.968963                | 3.469030  | 0.035673  |
| 7                | 1                | 0              | 1.289363                | 2.908164  | -1.048846 |
| 8                | 8                | 0              | 1.461966                | 1.115518  | 1.458256  |
| 9                | 6                | 0              | -1.898798               | 0.393425  | 0.945029  |
| 10               | 6                | 0              | -1.410351               | 0.056859  | -0.339447 |
| 11               | 6                | 0              | -2.306291               | -0.425930 | -1.294461 |
| 12               | 6                | 0              | -3.655021               | -0.551939 | -0.960513 |
| 13               | 6                | 0              | -4.117311               | -0.198862 | 0.309823  |
| 14               | 6                | 0              | -3.238948               | 0.280054  | 1.283040  |
| 15               | 6                | 0              | 0.352692                | 0.767722  | 0.978595  |
| 16               | 6                | 0              | 0.014655                | 0.356140  | -0.357513 |
| 17               | 1                | 0              | -1.957836               | -0.699530 | -2.286341 |
| 18               | 1                | 0              | -4.354760               | -0.928354 | -1.698386 |
| 19               | 1                | 0              | -5.169967               | -0.301434 | 0.547400  |
| 20               | 1                | 0              | -3.588646               | 0.550055  | 2.273423  |
| 21               | 1                | 0              | -0.868193               | 1.165059  | 2.654012  |
| 22               | 7                | 0              | -0.820159               | 0.816510  | 1.707145  |
| 23               | 6                | 0              | 1.015639                | -0.240545 | -1.316331 |
| 24               | 1                | 0              | 0.586754                | -0.267228 | -2.322902 |
| 25               | 6                | 0              | 1.484772                | -1.649696 | -0.940430 |
| 26               | 1                | 0              | 2.086017                | -2.075875 | -1.742493 |
| 27               | 1                | 0              | 1.913382                | 0.380220  | -1.375249 |
| 28               | 7                | 0              | 0.302414                | -2.545200 | -0.753935 |
| 29               | 1                | 0              | -0.374008               | -2.459678 | -1.515198 |
| 30               | 1                | 0              | 0.594132                | -3.521561 | -0.685025 |
| 31               | 1                | 0              | -0.156200               | -2.309618 | 0.130883  |
| 32               | 6                | 0              | 2.299296                | -1.648199 | 0.367751  |
| 33               | 8                | 0              | 1.741077                | -2.133061 | 1.377499  |
| 34               | 8                | 0              | 3.433791                | -1.135607 | 0.286845  |

## Standard orientation of TS-T1-tautomerize2

Cartesian coordinates of the transition state optimized at the M06-2X/6-311G(d) level:

Standard orientation of transition state of TS-T1-tautomerize2

State=1-A

Charge = 0 Multiplicity = 1

Lowest Harmonic Vibrational Frequency (LHVF) = -851.75 cm<sup>-1</sup>

Standard orientation:

| Center<br>Number | Atomic<br>Number | Atomic<br>Type | Coordinates (Angstroms) |           |           |
|------------------|------------------|----------------|-------------------------|-----------|-----------|
|                  |                  |                | X                       | Y         | Z         |
| 1                | 6                | 0              | -0.837073               | -1.282913 | 0.262330  |
| 2                | 6                | 0              | -1.473858               | -0.223085 | 0.930766  |
| 3                | 6                | 0              | -2.842856               | -0.044949 | 0.839638  |
| 4                | 6                | 0              | -3.585373               | -0.921724 | 0.040225  |
| 5                | 6                | 0              | -2.947290               | -1.956196 | -0.642290 |
| 6                | 6                | 0              | -1.568797               | -2.154368 | -0.536582 |
| 7                | 6                | 0              | 0.836322                | -0.293325 | 1.299973  |
| 8                | 6                | 0              | -0.394121               | 0.561998  | 1.618662  |
| 9                | 1                | 0              | -3.331538               | 0.773809  | 1.359809  |
| 10               | 1                | 0              | -4.657783               | -0.794361 | -0.050458 |
| 11               | 1                | 0              | -3.532325               | -2.624942 | -1.264241 |
| 12               | 1                | 0              | -1.078265               | -2.965411 | -1.063726 |
| 13               | 7                | 0              | 0.542437                | -1.319550 | 0.507064  |
| 14               | 6                | 0              | -0.206099               | 2.012657  | 1.133709  |
| 15               | 1                | 0              | 0.743217                | 2.377799  | 1.530707  |
| 16               | 1                | 0              | -0.990698               | 2.638458  | 1.567541  |
| 17               | 6                | 0              | -0.177841               | 2.267865  | -0.377283 |
| 18               | 6                | 0              | 0.801406                | 1.383105  | -1.186955 |
| 19               | 8                | 0              | 2.003928                | 1.507798  | -0.882621 |
| 20               | 8                | 0              | 0.299082                | 0.651144  | -2.066787 |
| 21               | 1                | 0              | 0.117917                | 3.306025  | -0.525839 |
| 22               | 7                | 0              | -1.536889               | 2.138410  | -0.999069 |
| 23               | 1                | 0              | -2.279376               | 2.487691  | -0.390167 |
| 24               | 1                | 0              | -1.571482               | 2.653656  | -1.880572 |
| 25               | 1                | 0              | -1.718452               | 1.156444  | -1.224765 |
| 26               | 8                | 0              | 1.973688                | 0.007917  | 1.750202  |
| 27               | 1                | 0              | 3.197145                | -0.422662 | 0.932161  |
| 28               | 1                | 0              | -0.524657               | 0.593738  | 2.704127  |
| 29               | 1                | 0              | 1.610083                | -1.791910 | -0.554566 |
| 30               | 8                | 0              | 2.421972                | -1.910906 | -1.187689 |

|    |   |   |          |           |           |
|----|---|---|----------|-----------|-----------|
| 31 | 1 | 0 | 2.629285 | -2.852248 | -1.233988 |
| 32 | 1 | 0 | 3.291294 | -1.326651 | -0.519598 |
| 33 | 8 | 0 | 3.914985 | -0.720616 | 0.267087  |
| 34 | 1 | 0 | 4.521041 | -1.318531 | 0.722908  |

## Standard orientation of TS-T1-c1

Cartesian coordinates of the transition state optimized at the M06-2X/6-311+G(d) level:

Standard orientation of transition state of TS-T1-c1

State=1-A

Charge = -1 Multiplicity = 1

Lowest Harmonic Vibrational Frequency (LHVF) = -220.85 cm<sup>-1</sup>

Standard orientation:

| Center Number | Atomic Number | Atomic Type | Coordinates (Angstroms) |           |           |
|---------------|---------------|-------------|-------------------------|-----------|-----------|
|               |               |             | X                       | Y         | Z         |
| 1             | 8             | 0           | -3.457319               | 1.107631  | -1.126842 |
| 2             | 8             | 0           | -1.264431               | -1.226398 | 0.915602  |
| 3             | 6             | 0           | -0.010872               | 1.689251  | -0.488097 |
| 4             | 6             | 0           | 1.242693                | 1.180743  | 0.000333  |
| 5             | 6             | 0           | 2.423881                | 1.959065  | -0.063865 |
| 6             | 6             | 0           | 2.366815                | 3.198693  | -0.642345 |
| 7             | 6             | 0           | 1.126496                | 3.696295  | -1.151579 |
| 8             | 6             | 0           | -0.039704               | 2.983077  | -1.089119 |
| 9             | 6             | 0           | -0.445014               | -0.365135 | 0.145486  |
| 10            | 6             | 0           | 0.964788                | -0.044516 | 0.637138  |
| 11            | 1             | 0           | 3.353109                | 1.574879  | 0.347675  |
| 12            | 1             | 0           | 3.253939                | 3.815850  | -0.715586 |
| 13            | 1             | 0           | 1.115634                | 4.683457  | -1.602094 |
| 14            | 1             | 0           | -0.970715               | 3.383041  | -1.475342 |
| 15            | 1             | 0           | -2.465832               | 1.033412  | -0.785679 |
| 16            | 1             | 0           | -0.259954               | -0.994644 | -0.744813 |
| 17            | 7             | 0           | -1.032662               | 0.857231  | -0.315432 |
| 18            | 17            | 0           | -3.884382               | -0.485374 | -1.505839 |
| 19            | 6             | 0           | 1.971666                | -1.115721 | 0.956059  |
| 20            | 1             | 0           | 1.539043                | -1.837016 | 1.648327  |
| 21            | 1             | 0           | 2.825430                | -0.653098 | 1.455057  |
| 22            | 6             | 0           | 2.491815                | -1.912845 | -0.248358 |
| 23            | 6             | 0           | 1.416904                | -2.734405 | -0.987142 |
| 24            | 8             | 0           | 0.765936                | -3.525123 | -0.272932 |
| 25            | 8             | 0           | 1.296288                | -2.538111 | -2.216871 |

|    |    |   |           |           |           |
|----|----|---|-----------|-----------|-----------|
| 26 | 1  | 0 | 3.243012  | -2.609694 | 0.124647  |
| 27 | 7  | 0 | 3.195098  | -1.031188 | -1.227495 |
| 28 | 1  | 0 | 3.944384  | -0.497242 | -0.779463 |
| 29 | 1  | 0 | 3.599597  | -1.590955 | -1.981084 |
| 30 | 1  | 0 | 2.545543  | -0.371022 | -1.664662 |
| 31 | 17 | 0 | -2.401116 | -0.473319 | 1.936370  |
| 32 | 17 | 0 | 0.600743  | 0.578089  | 2.873632  |

## Standard orientation of TS-T1-c2

Cartesian coordinates of the transition state optimized at the M06-2X/6-311+G(d) level:

Standard orientation of transition state of TS-T1-c2

State=1-A

Charge = -1 Multiplicity = 1

Lowest Harmonic Vibrational Frequency (LHVF) = -1150.40 cm<sup>-1</sup>

Standard orientation:

| Center<br>Number | Atomic<br>Number | Atomic<br>Type | Coordinates (Angstroms) |           |           |
|------------------|------------------|----------------|-------------------------|-----------|-----------|
|                  |                  |                | X                       | Y         | Z         |
| 1                | 8                | 0              | 0.298693                | -1.850776 | 1.299715  |
| 2                | 8                | 0              | 1.588923                | 1.136889  | 1.162685  |
| 3                | 6                | 0              | -1.825670               | 0.632834  | 0.521645  |
| 4                | 6                | 0              | -1.365291               | 0.376311  | -0.774735 |
| 5                | 6                | 0              | -2.234268               | -0.051016 | -1.767610 |
| 6                | 6                | 0              | -3.572844               | -0.260780 | -1.438886 |
| 7                | 6                | 0              | -4.020960               | -0.023653 | -0.136540 |
| 8                | 6                | 0              | -3.158166               | 0.426408  | 0.860366  |
| 9                | 6                | 0              | 0.438755                | 0.715527  | 0.661779  |
| 10               | 6                | 0              | 0.090653                | 0.732015  | -0.834392 |
| 11               | 1                | 0              | -1.878009               | -0.222819 | -2.779357 |
| 12               | 1                | 0              | -4.267406               | -0.608468 | -2.194161 |
| 13               | 1                | 0              | -5.063898               | -0.193947 | 0.106581  |
| 14               | 1                | 0              | -3.510278               | 0.607503  | 1.869629  |
| 15               | 1                | 0              | -0.837447               | 0.836884  | 2.308886  |
| 16               | 1                | 0              | 0.543777                | -0.499706 | 0.973678  |
| 17               | 7                | 0              | -0.787148               | 1.107146  | 1.331260  |
| 18               | 17               | 0              | -0.880669               | -1.992467 | 2.502998  |
| 19               | 6                | 0              | 0.987709                | -0.002979 | -1.830954 |
| 20               | 1                | 0              | 1.947079                | 0.513407  | -1.877010 |
| 21               | 1                | 0              | 0.519810                | 0.121668  | -2.810683 |
| 22               | 6                | 0              | 1.329423                | -1.484129 | -1.664005 |

|    |    |   |           |           |           |
|----|----|---|-----------|-----------|-----------|
| 23 | 6  | 0 | 2.456526  | -1.858801 | -0.667353 |
| 24 | 8  | 0 | 3.258380  | -0.961353 | -0.342676 |
| 25 | 8  | 0 | 2.496458  | -3.069095 | -0.344355 |
| 26 | 1  | 0 | 1.712005  | -1.805182 | -2.635854 |
| 27 | 7  | 0 | 0.154695  | -2.364402 | -1.388125 |
| 28 | 1  | 0 | -0.616774 | -2.198377 | -2.036219 |
| 29 | 1  | 0 | 0.447929  | -3.340076 | -1.468538 |
| 30 | 1  | 0 | -0.157364 | -2.227589 | -0.403781 |
| 31 | 17 | 0 | 1.899547  | 3.045638  | 1.271722  |
| 32 | 17 | 0 | 0.139528  | 2.509284  | -1.447305 |

## Standard orientation of TS-T1-2-OH-d

Cartesian coordinates of the transition state optimized at the M06-2X/6-311G(d) level:

Standard orientation of transition state of TS-T1-2-OH-d

State=1-A

Charge = 0 Multiplicity = 1

Lowest Harmonic Vibrational Frequency (LHVF) = -928.50 cm<sup>-1</sup>

Standard orientation:

| Center<br>Number | Atomic<br>Number | Atomic<br>Type | Coordinates (Angstroms) |           |           |
|------------------|------------------|----------------|-------------------------|-----------|-----------|
|                  |                  |                | X                       | Y         | Z         |
| 1                | 1                | 0              | 0.924874                | -0.498137 | 1.430463  |
| 2                | 8                | 0              | 4.027539                | 0.388177  | 2.194727  |
| 3                | 1                | 0              | 4.053948                | 1.338594  | 2.343189  |
| 4                | 17               | 0              | 2.078918                | -1.069944 | -0.466812 |
| 5                | 8                | 0              | 1.632089                | -0.529825 | 2.833352  |
| 6                | 1                | 0              | 1.717631                | -1.443456 | 3.126497  |
| 7                | 1                | 0              | 2.547655                | -0.204272 | 2.627086  |
| 8                | 8                | 0              | 4.073971                | -1.747327 | -1.403647 |
| 9                | 1                | 0              | 4.419952                | 0.221731  | 1.268146  |
| 10               | 1                | 0              | 3.988622                | -1.422474 | -2.306075 |
| 11               | 8                | 0              | 5.101241                | 0.008996  | -0.099463 |
| 12               | 1                | 0              | 4.607456                | -0.909184 | -0.787710 |
| 13               | 1                | 0              | 6.016794                | -0.219354 | 0.086689  |
| 14               | 6                | 0              | 0.453398                | 1.019246  | 0.077530  |
| 15               | 6                | 0              | -0.663634               | 1.195740  | -0.723703 |
| 16               | 6                | 0              | -1.000400               | 2.471754  | -1.155853 |
| 17               | 6                | 0              | -0.199297               | 3.536864  | -0.751547 |
| 18               | 6                | 0              | 0.921494                | 3.332448  | 0.056808  |
| 19               | 6                | 0              | 1.272072                | 2.055481  | 0.485776  |



|    |    |   |           |           |           |
|----|----|---|-----------|-----------|-----------|
| 20 | 6  | 0 | -0.714217 | -1.021930 | 0.099394  |
| 21 | 6  | 0 | -1.316650 | -0.128601 | -1.001905 |
| 22 | 1  | 0 | -1.864964 | 2.633703  | -1.790925 |
| 23 | 1  | 0 | -0.447191 | 4.541273  | -1.072539 |
| 24 | 1  | 0 | 1.529789  | 4.178110  | 0.353044  |
| 25 | 1  | 0 | 2.150362  | 1.866773  | 1.093394  |
| 26 | 7  | 0 | 0.641906  | -0.375164 | 0.402831  |
| 27 | 6  | 0 | -2.844613 | -0.151022 | -1.097894 |
| 28 | 1  | 0 | -3.148078 | -1.133305 | -1.459964 |
| 29 | 1  | 0 | -3.137009 | 0.578078  | -1.857015 |
| 30 | 6  | 0 | -3.666132 | 0.082781  | 0.168813  |
| 31 | 6  | 0 | -3.553849 | -1.025016 | 1.244900  |
| 32 | 8  | 0 | -3.616724 | -2.191473 | 0.815205  |
| 33 | 8  | 0 | -3.417270 | -0.636078 | 2.424171  |
| 34 | 1  | 0 | -4.710314 | 0.108059  | -0.146619 |
| 35 | 7  | 0 | -3.413542 | 1.408827  | 0.812098  |
| 36 | 1  | 0 | -3.557002 | 2.184543  | 0.161746  |
| 37 | 1  | 0 | -4.049786 | 1.520767  | 1.604548  |
| 38 | 1  | 0 | -2.466851 | 1.473346  | 1.195839  |
| 39 | 8  | 0 | -0.629905 | -2.342556 | -0.228559 |
| 40 | 1  | 0 | -0.712696 | -2.880923 | 0.569096  |
| 41 | 17 | 0 | -0.708457 | -0.702128 | -2.631838 |
| 42 | 1  | 0 | -1.256154 | -0.850081 | 1.033457  |

## Standard orientation of TS-T1-2-OCl-d

Cartesian coordinates of the transition state optimized at the M06-2X/6-311G(d) level:

Standard orientation of transition state of TS-T1-2-OCl-d

State=1-A

Charge = 0 Multiplicity = 1

Lowest Harmonic Vibrational Frequency (LHVF) = -605.88 cm<sup>-1</sup>

Standard orientation:

| Center<br>Number | Atomic<br>Number | Atomic<br>Type | Coordinates (Angstroms) |           |           |
|------------------|------------------|----------------|-------------------------|-----------|-----------|
|                  |                  |                | X                       | Y         | Z         |
| 1                | 1                | 0              | -1.059084               | -0.183936 | -1.264182 |
| 2                | 8                | 0              | -4.123186               | 0.751760  | -1.845399 |
| 3                | 1                | 0              | -3.830130               | 1.506467  | -1.323991 |
| 4                | 17               | 0              | -2.163433               | -0.055238 | 0.763825  |
| 5                | 8                | 0              | -1.855812               | -0.396920 | -2.554798 |
| 6                | 1                | 0              | -2.007725               | -1.335367 | -2.711983 |

|    |    |   |           |           |           |
|----|----|---|-----------|-----------|-----------|
| 7  | 1  | 0 | -2.741454 | 0.016343  | -2.359105 |
| 8  | 8  | 0 | -4.131874 | -0.238229 | 1.863620  |
| 9  | 1  | 0 | -4.556990 | 0.097401  | -1.190200 |
| 10 | 1  | 0 | -4.360784 | 0.683327  | 2.026729  |
| 11 | 8  | 0 | -5.173216 | -0.922299 | -0.218935 |
| 12 | 1  | 0 | -4.666667 | -0.556631 | 0.909729  |
| 13 | 1  | 0 | -4.700312 | -1.730106 | -0.445911 |
| 14 | 6  | 0 | -0.170251 | 1.467550  | -0.326026 |
| 15 | 6  | 0 | 0.996035  | 1.582231  | 0.414686  |
| 16 | 6  | 0 | 1.629588  | 2.812659  | 0.514617  |
| 17 | 6  | 0 | 1.066311  | 3.896553  | -0.154340 |
| 18 | 6  | 0 | -0.104503 | 3.754955  | -0.902453 |
| 19 | 6  | 0 | -0.750614 | 2.525533  | -1.000094 |
| 20 | 6  | 0 | 0.522328  | -0.701459 | 0.151509  |
| 21 | 6  | 0 | 1.367359  | 0.256178  | 1.018154  |
| 22 | 1  | 0 | 2.539465  | 2.924751  | 1.094608  |
| 23 | 1  | 0 | 1.546140  | 4.865741  | -0.095577 |
| 24 | 1  | 0 | -0.518195 | 4.613498  | -1.416789 |
| 25 | 1  | 0 | -1.659883 | 2.397832  | -1.576274 |
| 26 | 7  | 0 | -0.673810 | 0.112804  | -0.293218 |
| 27 | 6  | 0 | 2.858795  | -0.078226 | 1.112164  |
| 28 | 1  | 0 | 2.967963  | -0.988326 | 1.701844  |
| 29 | 1  | 0 | 3.337469  | 0.729421  | 1.670790  |
| 30 | 6  | 0 | 3.637128  | -0.335998 | -0.176882 |
| 31 | 6  | 0 | 3.208041  | -1.605013 | -0.952670 |
| 32 | 8  | 0 | 3.053659  | -2.623938 | -0.256197 |
| 33 | 8  | 0 | 3.055709  | -1.473093 | -2.185822 |
| 34 | 1  | 0 | 4.677094  | -0.480547 | 0.119250  |
| 35 | 7  | 0 | 3.647173  | 0.827503  | -1.115712 |
| 36 | 1  | 0 | 3.993641  | 1.679445  | -0.668278 |
| 37 | 1  | 0 | 4.249135  | 0.607268  | -1.912271 |
| 38 | 1  | 0 | 2.719222  | 1.014026  | -1.504650 |
| 39 | 8  | 0 | 0.185452  | -1.849280 | 0.846144  |
| 40 | 17 | 0 | 0.734540  | 0.236177  | 2.734445  |
| 41 | 1  | 0 | 1.044406  | -0.920422 | -0.782623 |
| 42 | 17 | 0 | -0.420168 | -3.060710 | -0.191769 |

-----

### Standard orientation of TS-T1-2-OCl-e(1,3-di-Cl-2-O-3-R-Indoline)

Cartesian coordinates of the transition state optimized at the M06-2X/6-311+G(d) level:

Standard orientation of transition state of TS-T1-2-OCl-e(1,3-di-Cl-2-O-3-R-Indoline)

State=1-A

Charge = -1 Multiplicity = 1

Lowest Harmonic Vibrational Frequency (LHVF) = -1324.79 cm<sup>-1</sup>

Standard orientation:

| Center<br>Number | Atomic<br>Number | Atomic<br>Type | Coordinates (Angstroms) |           |           |
|------------------|------------------|----------------|-------------------------|-----------|-----------|
|                  |                  |                | X                       | Y         | Z         |
| 1                | 8                | 0              | 0.167347                | -1.614670 | -1.648882 |
| 2                | 8                | 0              | -1.530202               | 1.002862  | -1.001818 |
| 3                | 6                | 0              | 1.779386                | 0.752292  | 0.172473  |
| 4                | 6                | 0              | 1.145383                | 0.058593  | 1.208929  |
| 5                | 6                | 0              | 1.889157                | -0.640144 | 2.145489  |
| 6                | 6                | 0              | 3.279074                | -0.642634 | 2.021338  |
| 7                | 6                | 0              | 3.898537                | 0.064122  | 0.989738  |
| 8                | 6                | 0              | 3.157266                | 0.775864  | 0.046952  |
| 9                | 6                | 0              | -0.430520               | 0.627154  | -0.379518 |
| 10               | 6                | 0              | -0.330902               | 0.318589  | 1.112735  |
| 11               | 1                | 0              | 1.402559                | -1.175531 | 2.953960  |
| 12               | 1                | 0              | 3.881726                | -1.193940 | 2.733158  |
| 13               | 1                | 0              | 4.979694                | 0.055703  | 0.911159  |
| 14               | 1                | 0              | 3.641931                | 1.303329  | -0.765952 |
| 15               | 1                | 0              | -0.186598               | -0.492126 | -1.016536 |
| 16               | 7                | 0              | 0.801867                | 1.393855  | -0.632028 |
| 17               | 17               | 0              | 1.830512                | -1.911689 | -1.787750 |
| 18               | 6                | 0              | -1.326789               | -0.638998 | 1.774875  |
| 19               | 1                | 0              | -2.243110               | -0.084925 | 1.974297  |
| 20               | 1                | 0              | -0.910182               | -0.904305 | 2.749693  |
| 21               | 6                | 0              | -1.806856               | -1.913260 | 1.081039  |
| 22               | 6                | 0              | -2.808265               | -1.687378 | -0.077251 |
| 23               | 8                | 0              | -3.752540               | -0.908553 | 0.176857  |
| 24               | 8                | 0              | -2.622812               | -2.338472 | -1.127509 |
| 25               | 1                | 0              | -2.363504               | -2.461128 | 1.843533  |
| 26               | 7                | 0              | -0.708556               | -2.818562 | 0.638143  |
| 27               | 1                | 0              | 0.031588                | -2.883251 | 1.340028  |
| 28               | 1                | 0              | -1.072196               | -3.757485 | 0.470533  |
| 29               | 1                | 0              | -0.307248               | -2.472032 | -0.267315 |
| 30               | 17               | 0              | -2.237924               | 2.731442  | -0.627465 |
| 31               | 17               | 0              | -0.569018               | 1.912653  | 2.101969  |
| 32               | 17               | 0              | 1.195548                | 1.530189  | -2.318480 |

**Standard orientation of TS-T1-2-OH-e(1-Cl-2-OH-3-R-Indole)**

Cartesian coordinates of the transition state optimized at the M06-2X/6-311+G(d) level:

Standard orientation of transition state of TS-T1-2-OH-e(1-Cl-2-OH-3-R-Indole)

State=1-A

Charge = -1 Multiplicity = 1

Lowest Harmonic Vibrational Frequency (LHVF) = -702.45 cm<sup>-1</sup>

Standard orientation:

| -----            |                  |                |                         |           |           |  |
|------------------|------------------|----------------|-------------------------|-----------|-----------|--|
| Center<br>Number | Atomic<br>Number | Atomic<br>Type | Coordinates (Angstroms) |           |           |  |
|                  |                  |                | X                       | Y         | Z         |  |
| -----            |                  |                |                         |           |           |  |
| 1                | 8                | 0              | -1.228986               | 1.992938  | 0.160465  |  |
| 2                | 8                | 0              | -0.741588               | -0.940058 | 2.158770  |  |
| 3                | 6                | 0              | 1.859974                | 0.118592  | 0.069645  |  |
| 4                | 6                | 0              | 1.017513                | -0.475516 | -0.912832 |  |
| 5                | 6                | 0              | 1.443810                | -0.548951 | -2.261906 |  |
| 6                | 6                | 0              | 2.661930                | -0.003491 | -2.587017 |  |
| 7                | 6                | 0              | 3.467188                | 0.620014  | -1.593344 |  |
| 8                | 6                | 0              | 3.088938                | 0.701873  | -0.267828 |  |
| 9                | 6                | 0              | -0.133278               | -0.355217 | 1.068576  |  |
| 10               | 6                | 0              | -0.153799               | -0.906538 | -0.271948 |  |
| 11               | 1                | 0              | 0.812797                | -1.026466 | -3.006555 |  |
| 12               | 1                | 0              | 3.021671                | -0.037474 | -3.609750 |  |
| 13               | 1                | 0              | 4.419711                | 1.047998  | -1.891571 |  |
| 14               | 1                | 0              | 3.713846                | 1.185466  | 0.475405  |  |
| 15               | 1                | 0              | -0.664698               | 0.705318  | 0.747716  |  |
| 16               | 7                | 0              | 1.248427                | 0.015912  | 1.287199  |  |
| 17               | 17               | 0              | 0.083233                | 3.009886  | -0.185124 |  |
| 18               | 6                | 0              | -1.340118               | -1.576762 | -0.873811 |  |
| 19               | 1                | 0              | -1.698934               | -2.346298 | -0.184130 |  |
| 20               | 1                | 0              | -1.030951               | -2.068233 | -1.800392 |  |
| 21               | 6                | 0              | -2.527489               | -0.653864 | -1.183625 |  |
| 22               | 6                | 0              | -3.340643               | -0.119810 | 0.021695  |  |
| 23               | 8                | 0              | -3.229583               | -0.720626 | 1.124123  |  |
| 24               | 8                | 0              | -4.087577               | 0.851585  | -0.229884 |  |
| 25               | 1                | 0              | -3.225982               | -1.226258 | -1.800085 |  |
| 26               | 7                | 0              | -2.106783               | 0.532438  | -1.987790 |  |
| 27               | 1                | 0              | -1.469745               | 0.271583  | -2.749052 |  |
| 28               | 1                | 0              | -2.930500               | 0.988058  | -2.394277 |  |
| 29               | 1                | 0              | -1.647848               | 1.230218  | -1.340201 |  |
| 30               | 17               | 0              | 1.022631                | -3.624891 | 0.425542  |  |
| 31               | 1                | 0              | -1.713289               | -0.911970 | 1.976193  |  |
| 32               | 17               | 0              | 1.627084                | 1.090118  | 2.555312  |  |
| -----            |                  |                |                         |           |           |  |

## Standard orientation of TS-T1-2-OC1-e(1-Cl-2-OC1-3-R-Indole)

Cartesian coordinates of the transition state optimized at the M06-2X/6-311+G(d) level:

Standard orientation of transition state of TS-T1-2-OC1-e(1-Cl-2-OC1-3-R-Indole)

State=1-A

Charge = -1 Multiplicity = 1

Lowest Harmonic Vibrational Frequency (LHVF) = -842.25 cm<sup>-1</sup>

Standard orientation:

| Center<br>Number | Atomic<br>Number | Atomic<br>Type | Coordinates (Angstroms) |           |           |
|------------------|------------------|----------------|-------------------------|-----------|-----------|
|                  |                  |                | X                       | Y         | Z         |
| 1                | 8                | 0              | 0.642288                | -2.047648 | -0.952239 |
| 2                | 8                | 0              | 1.227184                | 0.321086  | 1.651085  |
| 3                | 6                | 0              | -1.997328               | 0.041140  | 0.339575  |
| 4                | 6                | 0              | -1.378130               | 0.894877  | -0.618082 |
| 5                | 6                | 0              | -2.146778               | 1.460316  | -1.666993 |
| 6                | 6                | 0              | -3.470232               | 1.124116  | -1.746947 |
| 7                | 6                | 0              | -4.054197               | 0.234701  | -0.801797 |
| 8                | 6                | 0              | -3.344505               | -0.323998 | 0.236962  |
| 9                | 6                | 0              | 0.247389                | 0.005738  | 0.728305  |
| 10               | 6                | 0              | -0.024151               | 0.993885  | -0.302584 |
| 11               | 1                | 0              | -1.685200               | 2.129833  | -2.383472 |
| 12               | 1                | 0              | -4.090037               | 1.527104  | -2.537923 |
| 13               | 1                | 0              | -5.105162               | -0.010344 | -0.905386 |
| 14               | 1                | 0              | -3.806063               | -1.001859 | 0.943712  |
| 15               | 1                | 0              | 0.509639                | -0.967939 | 0.015683  |
| 16               | 7                | 0              | -1.071568               | -0.315870 | 1.273129  |
| 17               | 17               | 0              | -0.896163               | -2.658746 | -1.337464 |
| 18               | 6                | 0              | 1.006650                | 1.808411  | -1.000091 |
| 19               | 1                | 0              | 1.564174                | 2.374699  | -0.252113 |
| 20               | 1                | 0              | 0.501969                | 2.521555  | -1.652204 |
| 21               | 6                | 0              | 2.031217                | 1.011487  | -1.821515 |
| 22               | 6                | 0              | 3.146688                | 0.332918  | -0.991982 |
| 23               | 8                | 0              | 3.740647                | 1.078180  | -0.186040 |
| 24               | 8                | 0              | 3.382303                | -0.868623 | -1.242855 |
| 25               | 1                | 0              | 2.526257                | 1.725001  | -2.480773 |
| 26               | 7                | 0              | 1.372329                | -0.000760 | -2.698767 |
| 27               | 1                | 0              | 0.560268                | 0.394479  | -3.179062 |
| 28               | 1                | 0              | 2.029246                | -0.334480 | -3.405520 |
| 29               | 1                | 0              | 1.075013                | -0.836369 | -2.135585 |
| 30               | 17               | 0              | -0.478982               | 3.176016  | 1.707385  |

|    |    |   |           |           |          |
|----|----|---|-----------|-----------|----------|
| 31 | 17 | 0 | 2.162230  | -1.033580 | 2.148343 |
| 32 | 17 | 0 | -1.270882 | -1.758441 | 2.167818 |

-----

**Standard orientation of TS-T1-2-OH-e(2-OH-3-Cl-3-R-3H-Indole)**

Cartesian coordinates of the transition state optimized at the M06-2X/6-311+G(d) level:

Standard orientation of transition state of TS-T1-2-OH-e(2-OH-3-Cl-3-R-3H-Indole)  
State=1-A

Charge = -1 Multiplicity = 1

Lowest Harmonic Vibrational Frequency (LHVF) = -1203.65 cm<sup>-1</sup>

Standard orientation:

-----

| Center<br>Number | Atomic<br>Number | Atomic<br>Type | Coordinates (Angstroms) |           |           |
|------------------|------------------|----------------|-------------------------|-----------|-----------|
|                  |                  |                | X                       | Y         | Z         |
| 1                | 8                | 0              | 1.522338                | 1.343346  | -1.137017 |
| 2                | 8                | 0              | 0.339053                | -1.834308 | -1.644928 |
| 3                | 6                | 0              | -1.595534               | 0.639858  | -0.128319 |
| 4                | 6                | 0              | -0.956563               | 0.208602  | 1.037662  |
| 5                | 6                | 0              | -1.167594               | 0.861390  | 2.241777  |
| 6                | 6                | 0              | -2.053775               | 1.939129  | 2.255333  |
| 7                | 6                | 0              | -2.705926               | 2.352154  | 1.089037  |
| 8                | 6                | 0              | -2.481022               | 1.708391  | -0.123470 |
| 9                | 6                | 0              | -0.071664               | -0.791690 | -0.844322 |
| 10               | 6                | 0              | -0.108227               | -0.980006 | 0.687199  |
| 11               | 1                | 0              | -0.668238               | 0.539466  | 3.150140  |
| 12               | 1                | 0              | -2.243587               | 2.462405  | 3.185299  |
| 13               | 1                | 0              | -3.389913               | 3.191751  | 1.130025  |
| 14               | 1                | 0              | -2.970222               | 2.027748  | -1.036404 |
| 15               | 1                | 0              | 0.689583                | 0.212963  | -1.014137 |
| 16               | 7                | 0              | -1.186476               | -0.091929 | -1.278194 |
| 17               | 17               | 0              | 0.603885                | 2.612917  | -1.768669 |
| 18               | 6                | 0              | 1.190638                | -1.217984 | 1.465826  |
| 19               | 1                | 0              | 1.515705                | -2.239331 | 1.265091  |
| 20               | 1                | 0              | 0.928476                | -1.183449 | 2.526821  |
| 21               | 6                | 0              | 2.437834                | -0.365897 | 1.263531  |
| 22               | 6                | 0              | 3.232215                | -0.560070 | -0.051382 |
| 23               | 8                | 0              | 2.923239                | -1.528673 | -0.785335 |
| 24               | 8                | 0              | 4.168220                | 0.245816  | -0.227233 |
| 25               | 1                | 0              | 3.127435                | -0.671676 | 2.053444  |
| 26               | 7                | 0              | 2.221708                | 1.098242  | 1.462870  |
| 27               | 1                | 0              | 1.669697                | 1.294118  | 2.299769  |

-----

|    |    |   |           |           |           |
|----|----|---|-----------|-----------|-----------|
| 28 | 1  | 0 | 3.125474  | 1.566558  | 1.551161  |
| 29 | 1  | 0 | 1.758395  | 1.484576  | 0.612331  |
| 30 | 17 | 0 | -1.115340 | -2.482911 | 1.078638  |
| 31 | 1  | 0 | 1.293829  | -1.953918 | -1.465001 |
| 32 | 17 | 0 | -2.901977 | -1.444600 | -1.577757 |

-----

### Standard orientation of TS-T1-2-OCI-e(2-OCI-3-Cl-3-R-3H-Indole)

Cartesian coordinates of the transition state optimized at the M06-2X/6-311+G(d) level:

Standard orientation of transition state of TS-T1-2-OCI-e(2-OCI-3-Cl-3-R-3H-Indole) State=1-A

Charge = -1 Multiplicity = 1

Lowest Harmonic Vibrational Frequency (LHVF) = -1339.63 cm<sup>-1</sup>

Standard orientation:

-----

| Center<br>Number | Atomic<br>Number | Atomic<br>Type | Coordinates (Angstroms) |           |           |
|------------------|------------------|----------------|-------------------------|-----------|-----------|
|                  |                  |                | X                       | Y         | Z         |
| 1                | 8                | 0              | 1.490673                | -0.391605 | 1.598456  |
| 2                | 8                | 0              | 0.440661                | 2.139376  | -0.481172 |
| 3                | 6                | 0              | -1.713758               | -0.407313 | 0.561393  |
| 4                | 6                | 0              | -1.216308               | -1.015276 | -0.591911 |
| 5                | 6                | 0              | -1.622334               | -2.292093 | -0.948014 |
| 6                | 6                | 0              | -2.537495               | -2.943464 | -0.120268 |
| 7                | 6                | 0              | -3.029149               | -2.328085 | 1.034087  |
| 8                | 6                | 0              | -2.620338               | -1.046036 | 1.392760  |
| 9                | 6                | 0              | -0.050827               | 0.897334  | -0.091357 |
| 10               | 6                | 0              | -0.254303               | -0.067170 | -1.257136 |
| 11               | 1                | 0              | -1.242847               | -2.773447 | -1.843985 |
| 12               | 1                | 0              | -2.871578               | -3.942165 | -0.376139 |
| 13               | 1                | 0              | -3.737340               | -2.857687 | 1.660498  |
| 14               | 1                | 0              | -2.995188               | -0.558429 | 2.285239  |
| 15               | 1                | 0              | 0.769924                | 0.264294  | 0.792032  |
| 16               | 7                | 0              | -1.166315               | 0.901060  | 0.763612  |
| 17               | 17               | 0              | 0.699487                | -0.473112 | 3.089767  |
| 18               | 6                | 0              | 0.939487                | -0.683043 | -1.998372 |
| 19               | 1                | 0              | 1.422907                | 0.104118  | -2.576952 |
| 20               | 1                | 0              | 0.507785                | -1.378124 | -2.722749 |
| 21               | 6                | 0              | 2.077316                | -1.412248 | -1.282613 |
| 22               | 6                | 0              | 3.196819                | -0.549107 | -0.646145 |
| 23               | 8                | 0              | 3.258221                | 0.650830  | -0.975438 |
| 24               | 8                | 0              | 3.986824                | -1.177981 | 0.096629  |

-----

|    |    |   |           |           |           |
|----|----|---|-----------|-----------|-----------|
| 25 | 1  | 0 | 2.584547  | -1.988132 | -2.060164 |
| 26 | 7  | 0 | 1.641877  | -2.418545 | -0.267737 |
| 27 | 1  | 0 | 0.934285  | -3.059230 | -0.629763 |
| 28 | 1  | 0 | 2.456915  | -2.961324 | 0.026573  |
| 29 | 1  | 0 | 1.292757  | -1.927223 | 0.575637  |
| 30 | 17 | 0 | -1.197897 | 0.781600  | -2.629268 |
| 31 | 17 | 0 | -2.672070 | 2.142993  | 0.080103  |
| 32 | 17 | 0 | 1.118904  | 3.019918  | 0.822709  |

### Standard orientation of TS-T1-f

Cartesian coordinates of the transition state optimized at the M06-2X/6-311+G(d) level:

Standard orientation of transition state of TS-T1-f

State=1-A

Charge = -1 Multiplicity = 1

Lowest Harmonic Vibrational Frequency (LHVF) = -26.56 cm<sup>-1</sup>

Standard orientation:

| Center Number | Atomic Number | Atomic Type | Coordinates (Angstroms) |           |           |
|---------------|---------------|-------------|-------------------------|-----------|-----------|
|               |               |             | X                       | Y         | Z         |
| 1             | 8             | 0           | 4.017798                | -2.005455 | 0.170164  |
| 2             | 1             | 0           | 3.526343                | -2.514816 | -0.484015 |
| 3             | 17            | 0           | 2.174838                | 1.443365  | 0.409757  |
| 4             | 8             | 0           | 2.229998                | -1.513071 | 2.224806  |
| 5             | 1             | 0           | 1.605696                | -0.853333 | 1.887995  |
| 6             | 1             | 0           | 2.861792                | -1.672454 | 1.495873  |
| 7             | 8             | 0           | 3.718741                | 2.395218  | 0.195768  |
| 8             | 1             | 0           | 4.306249                | -1.182374 | -0.276979 |
| 9             | 1             | 0           | 3.508237                | 3.118251  | -0.409822 |
| 10            | 8             | 0           | 4.910771                | 0.278310  | -1.063295 |
| 11            | 1             | 0           | 4.601188                | 1.099367  | -0.629095 |
| 12            | 1             | 0           | 5.873273                | 0.313182  | -1.072801 |
| 13            | 6             | 0           | 0.108139                | -0.780109 | -0.311026 |
| 14            | 6             | 0           | -1.205684               | -1.255438 | -0.185391 |
| 15            | 6             | 0           | -1.676171               | -2.293087 | -0.969261 |
| 16            | 6             | 0           | -0.816503               | -2.849317 | -1.921413 |
| 17            | 6             | 0           | 0.480829                | -2.356754 | -2.065693 |
| 18            | 6             | 0           | 0.964321                | -1.319607 | -1.264238 |
| 19            | 6             | 0           | -0.698600               | 0.497497  | 1.336323  |
| 20            | 6             | 0           | -1.876503               | -0.405128 | 0.848241  |
| 21            | 1             | 0           | -2.692166               | -2.659554 | -0.853973 |



|    |    |   |           |           |           |
|----|----|---|-----------|-----------|-----------|
| 22 | 1  | 0 | -1.159485 | -3.662660 | -2.549677 |
| 23 | 1  | 0 | 1.134049  | -2.791503 | -2.814373 |
| 24 | 1  | 0 | 1.975277  | -0.945388 | -1.380228 |
| 25 | 7  | 0 | 0.396234  | 0.228158  | 0.616270  |
| 26 | 8  | 0 | -0.816697 | 1.310829  | 2.254161  |
| 27 | 6  | 0 | -3.093076 | 0.399233  | 0.378616  |
| 28 | 1  | 0 | -3.930121 | -0.290939 | 0.241320  |
| 29 | 1  | 0 | -3.370205 | 1.091710  | 1.176253  |
| 30 | 6  | 0 | -2.950684 | 1.226526  | -0.905033 |
| 31 | 1  | 0 | -3.867469 | 1.808306  | -0.998063 |
| 32 | 7  | 0 | -2.888310 | 0.372442  | -2.133896 |
| 33 | 1  | 0 | -3.517601 | -0.431901 | -2.075459 |
| 34 | 1  | 0 | -3.148898 | 0.923256  | -2.954669 |
| 35 | 1  | 0 | -1.934377 | 0.036655  | -2.294770 |
| 36 | 6  | 0 | -1.769098 | 2.223445  | -0.941215 |
| 37 | 8  | 0 | -0.923337 | 2.065509  | -1.849274 |
| 38 | 8  | 0 | -1.791102 | 3.106883  | -0.060294 |
| 39 | 17 | 0 | -2.404159 | -1.397444 | 2.274956  |

### Standard orientation of TS-T1-H<sub>2</sub>O-g-1

Cartesian coordinates of the transition state optimized at the M06-2X/6-311G(d) level:

Standard orientation of transition state of TS-T1-H<sub>2</sub>O-g-1

State=1-A

Charge = 0 Multiplicity = 1

Lowest Harmonic Vibrational Frequency (LHVF) = -887.18 cm<sup>-1</sup>

Standard orientation:

| Center Number | Atomic Number | Atomic Type | Coordinates (Angstroms) |           |           |
|---------------|---------------|-------------|-------------------------|-----------|-----------|
|               |               |             | X                       | Y         | Z         |
| 1             | 8             | 0           | -3.282007               | -1.422621 | 1.514937  |
| 2             | 1             | 0           | -3.751154               | -1.711137 | 2.305979  |
| 3             | 1             | 0           | -2.942471               | 1.414673  | 0.498541  |
| 4             | 8             | 0           | -2.596606               | 1.145494  | 1.390112  |
| 5             | 1             | 0           | -2.827104               | 0.193795  | 1.513370  |
| 6             | 1             | 0           | -1.396537               | 1.321269  | 1.574622  |
| 7             | 8             | 0           | -4.713248               | -0.908425 | -0.787575 |
| 8             | 1             | 0           | -4.437837               | -1.475297 | -1.514843 |
| 9             | 1             | 0           | -4.216263               | -1.205603 | -0.002382 |
| 10            | 8             | 0           | -3.746332               | 1.604567  | -0.940064 |
| 11            | 1             | 0           | -3.126287               | 1.711626  | -1.668402 |

|    |    |   |           |           |           |
|----|----|---|-----------|-----------|-----------|
| 12 | 1  | 0 | -4.124441 | 0.699842  | -1.015220 |
| 13 | 17 | 0 | 1.575768  | -0.800204 | 2.719551  |
| 14 | 17 | 0 | -0.557542 | 2.639299  | -0.818524 |
| 15 | 8  | 0 | 1.930775  | 1.985485  | 1.285749  |
| 16 | 6  | 0 | 0.208357  | -0.945485 | 0.427121  |
| 17 | 6  | 0 | -0.299008 | -0.113848 | -0.582430 |
| 18 | 6  | 0 | -1.234004 | -0.591662 | -1.484676 |
| 19 | 6  | 0 | -1.637951 | -1.925314 | -1.391679 |
| 20 | 6  | 0 | -1.106787 | -2.752761 | -0.402860 |
| 21 | 6  | 0 | -0.186891 | -2.273529 | 0.533115  |
| 22 | 6  | 0 | 1.020491  | 1.204191  | 0.949777  |
| 23 | 6  | 0 | 0.464792  | 1.175594  | -0.531289 |
| 24 | 1  | 0 | -1.624519 | 0.051858  | -2.266498 |
| 25 | 1  | 0 | -2.353610 | -2.323951 | -2.100534 |
| 26 | 1  | 0 | -1.420612 | -3.788767 | -0.346477 |
| 27 | 1  | 0 | 0.218766  | -2.919375 | 1.302371  |
| 28 | 7  | 0 | 1.196701  | -0.261957 | 1.140245  |
| 29 | 6  | 0 | 1.614025  | 1.263423  | -1.554590 |
| 30 | 1  | 0 | 1.178212  | 1.565941  | -2.509795 |
| 31 | 6  | 0 | 2.506205  | 0.050548  | -1.847246 |
| 32 | 1  | 0 | 3.238610  | 0.415504  | -2.568486 |
| 33 | 1  | 0 | 2.275177  | 2.070410  | -1.232891 |
| 34 | 6  | 0 | 3.330922  | -0.576084 | -0.694208 |
| 35 | 8  | 0 | 3.219473  | -1.811871 | -0.544460 |
| 36 | 8  | 0 | 4.071134  | 0.216773  | -0.083698 |
| 37 | 7  | 0 | 1.777106  | -1.051700 | -2.558869 |
| 38 | 1  | 0 | 1.051820  | -0.703160 | -3.188801 |
| 39 | 1  | 0 | 2.441038  | -1.600026 | -3.108993 |
| 40 | 1  | 0 | 1.362735  | -1.703118 | -1.886716 |
| 41 | 8  | 0 | -0.271717 | 1.491962  | 1.874098  |
| 42 | 1  | 0 | -0.148098 | 2.392407  | 2.202651  |
| 43 | 1  | 0 | -2.496583 | -1.977237 | 1.426415  |

---

### Standard orientation of TS-T1-OCI-g-1

Cartesian coordinates of the transition state optimized at the M06-2X/6-311+G(d) level:

Standard orientation of transition state of TS-T1-OCI-g-1

State=1-A

Charge = -1 Multiplicity = 1

Lowest Harmonic Vibrational Frequency (LHVF) = -159.95 cm<sup>-1</sup>

Standard orientation:

---

| Center<br>Number | Atomic<br>Number | Atomic<br>Type | Coordinates (Angstroms) |           |           |
|------------------|------------------|----------------|-------------------------|-----------|-----------|
|                  |                  |                | X                       | Y         | Z         |
| 1                | 8                | 0              | -3.968868               | -0.605710 | 1.991590  |
| 2                | 1                | 0              | -4.707158               | -0.194596 | 2.454458  |
| 3                | 1                | 0              | -3.061315               | 1.031182  | -0.417874 |
| 4                | 8                | 0              | -2.825332               | 1.329548  | 0.481084  |
| 5                | 1                | 0              | -3.484516               | 0.118719  | 1.536177  |
| 6                | 1                | 0              | -1.863338               | 1.533128  | 0.488911  |
| 7                | 8                | 0              | -4.891304               | -1.711153 | -0.350904 |
| 8                | 1                | 0              | -4.527055               | -2.586300 | -0.522069 |
| 9                | 1                | 0              | -4.561452               | -1.432126 | 0.529090  |
| 10               | 8                | 0              | -3.818565               | 0.278329  | -1.889933 |
| 11               | 1                | 0              | -3.087287               | -0.035266 | -2.433293 |
| 12               | 1                | 0              | -4.192146               | -0.506419 | -1.435889 |
| 13               | 17               | 0              | 1.985675                | 0.952576  | 2.483022  |
| 14               | 17               | 0              | -0.529140               | 1.218930  | -2.218420 |
| 15               | 8                | 0              | 2.100518                | 2.028465  | -0.411614 |
| 16               | 6                | 0              | 0.352384                | -0.622436 | 1.035574  |
| 17               | 6                | 0              | -0.216940               | -0.687583 | -0.242328 |
| 18               | 6                | 0              | -1.229453               | -1.590149 | -0.516063 |
| 19               | 6                | 0              | -1.660281               | -2.440483 | 0.505343  |
| 20               | 6                | 0              | -1.085651               | -2.365073 | 1.772905  |
| 21               | 6                | 0              | -0.070199               | -1.451340 | 2.062665  |
| 22               | 6                | 0              | 1.267642                | 1.185561  | -0.111157 |
| 23               | 6                | 0              | 0.537654                | 0.252499  | -1.134978 |
| 24               | 1                | 0              | -1.664324               | -1.647542 | -1.509070 |
| 25               | 1                | 0              | -2.443266               | -3.164391 | 0.314252  |
| 26               | 1                | 0              | -1.433780               | -3.027738 | 2.556942  |
| 27               | 1                | 0              | 0.372701                | -1.398215 | 3.049969  |
| 28               | 7                | 0              | 1.411778                | 0.298989  | 1.020202  |
| 29               | 6                | 0              | 1.558274                | -0.446154 | -2.059393 |
| 30               | 1                | 0              | 1.000852                | -0.855020 | -2.905945 |
| 31               | 6                | 0              | 2.438701                | -1.584484 | -1.526349 |
| 32               | 1                | 0              | 3.088216                | -1.850798 | -2.361931 |
| 33               | 1                | 0              | 2.228304                | 0.318433  | -2.458077 |
| 34               | 6                | 0              | 3.387584                | -1.304404 | -0.337290 |
| 35               | 8                | 0              | 3.351575                | -2.118279 | 0.612308  |
| 36               | 8                | 0              | 4.148279                | -0.326404 | -0.481682 |
| 37               | 7                | 0              | 1.655206                | -2.830023 | -1.234993 |
| 38               | 1                | 0              | 0.899226                | -2.970133 | -1.909893 |
| 39               | 1                | 0              | 2.272007                | -3.644235 | -1.271755 |
| 40               | 1                | 0              | 1.255022                | -2.813437 | -0.293262 |
| 41               | 8                | 0              | -0.231837               | 2.072731  | 0.604476  |

42            17            0            -0.289099    3.686497    0.144612

---

## Standard orientation of TS-T1-OH-g-2

Cartesian coordinates of the transition state optimized at the M06-2X/6-311G(d) level:

Standard orientation of transition state of TS-T1-OH-g-2

State=1-A

Charge = 0 Multiplicity = 1

Lowest Harmonic Vibrational Frequency (LHVF) = -719.68 cm<sup>-1</sup>

Standard orientation:

---

| Center<br>Number | Atomic<br>Number | Atomic<br>Type | Coordinates (Angstroms) |           |           |
|------------------|------------------|----------------|-------------------------|-----------|-----------|
|                  |                  |                | X                       | Y         | Z         |
| 1                | 8                | 0              | -3.248738               | 1.664627  | 0.804377  |
| 2                | 1                | 0              | -3.758294               | 2.377154  | 0.396705  |
| 3                | 1                | 0              | -3.310930               | -1.165084 | 0.256465  |
| 4                | 8                | 0              | -3.621180               | -0.431344 | -0.293399 |
| 5                | 1                | 0              | -2.306871               | 1.734691  | 0.489725  |
| 6                | 1                | 0              | -3.559004               | 0.583217  | 0.318986  |
| 7                | 17               | 0              | 0.206786                | 2.696071  | 0.550742  |
| 8                | 17               | 0              | -0.876032               | -1.928684 | -2.170720 |
| 9                | 8                | 0              | 0.390543                | 1.399407  | -2.078432 |
| 10               | 6                | 0              | -0.509633               | 0.162199  | 1.032151  |
| 11               | 6                | 0              | -0.322151               | -1.050185 | 0.368281  |
| 12               | 6                | 0              | -0.411636               | -2.251035 | 1.061808  |
| 13               | 6                | 0              | -0.621362               | -2.223023 | 2.437794  |
| 14               | 6                | 0              | -0.737502               | -1.001081 | 3.104746  |
| 15               | 6                | 0              | -0.699020               | 0.203929  | 2.410392  |
| 16               | 6                | 0              | -0.379788               | 0.712046  | -1.352971 |
| 17               | 6                | 0              | 0.054324                | -0.809867 | -1.060646 |
| 18               | 1                | 0              | -0.290401               | -3.193830 | 0.537312  |
| 19               | 1                | 0              | -0.683958               | -3.150111 | 2.994555  |
| 20               | 1                | 0              | -0.884330               | -0.988561 | 4.178449  |
| 21               | 1                | 0              | -0.825374               | 1.150596  | 2.923020  |
| 22               | 7                | 0              | -0.632710               | 1.242093  | 0.132670  |
| 23               | 6                | 0              | 1.534399                | -1.104850 | -1.384864 |
| 24               | 1                | 0              | 1.621734                | -2.174203 | -1.589605 |
| 25               | 6                | 0              | 2.663456                | -0.782775 | -0.397329 |
| 26               | 1                | 0              | 3.574091                | -1.097676 | -0.907736 |
| 27               | 1                | 0              | 1.772693                | -0.579721 | -2.311165 |
| 28               | 6                | 0              | 2.904924                | 0.683637  | 0.034393  |

|    |   |   |           |           |           |
|----|---|---|-----------|-----------|-----------|
| 29 | 8 | 0 | 2.817866  | 0.915420  | 1.259249  |
| 30 | 8 | 0 | 3.219699  | 1.462184  | -0.884782 |
| 31 | 7 | 0 | 2.603427  | -1.618715 | 0.845930  |
| 32 | 1 | 0 | 2.284811  | -2.572753 | 0.666167  |
| 33 | 1 | 0 | 3.531310  | -1.665566 | 1.270971  |
| 34 | 1 | 0 | 1.993692  | -1.177058 | 1.539117  |
| 35 | 8 | 0 | -1.774781 | 0.724432  | -1.787844 |
| 36 | 1 | 0 | -2.942552 | -0.260705 | -0.997790 |
| 37 | 1 | 0 | -1.757795 | 0.658613  | -2.751611 |

## Standard orientation of TS-T1-OCl-g-2

Cartesian coordinates of the transition state optimized at the M06-2X/6-311G(d) level:

Standard orientation of transition state of TS-T1-OCl-g-2

State=1-A

Charge = 0 Multiplicity = 1

Lowest Harmonic Vibrational Frequency (LHVF) = -679.58 cm<sup>-1</sup>

Standard orientation:

| Center<br>Number | Atomic<br>Number | Atomic<br>Type | Coordinates (Angstroms) |           |           |
|------------------|------------------|----------------|-------------------------|-----------|-----------|
|                  |                  |                | X                       | Y         | Z         |
| 1                | 8                | 0              | 2.474782                | 1.592142  | 1.961651  |
| 2                | 1                | 0              | 3.204871                | 1.064345  | 2.315156  |
| 3                | 1                | 0              | 1.991760                | 2.592762  | -0.812563 |
| 4                | 8                | 0              | 2.786531                | 2.118114  | -0.537404 |
| 5                | 1                | 0              | 1.612684                | 0.910773  | 1.677344  |
| 6                | 1                | 0              | 2.750659                | 1.961016  | 1.065956  |
| 7                | 17               | 0              | -0.235710               | -0.240757 | 2.766337  |
| 8                | 17               | 0              | 1.170024                | -0.457393 | -2.498855 |
| 9                | 8                | 0              | 0.495491                | -2.098123 | 0.654692  |
| 10               | 6                | 0              | -0.275367               | 1.269221  | 0.550590  |
| 11               | 6                | 0              | -0.408128               | 0.957483  | -0.796456 |
| 12               | 6                | 0              | -0.898908               | 1.913596  | -1.681028 |
| 13               | 6                | 0              | -1.299807               | 3.148851  | -1.185378 |
| 14               | 6                | 0              | -1.202414               | 3.430399  | 0.179910  |
| 15               | 6                | 0              | -0.672210               | 2.497870  | 1.063439  |
| 16               | 6                | 0              | 0.741314                | -0.968875 | 0.228727  |
| 17               | 6                | 0              | 0.001258                | -0.453341 | -1.091338 |
| 18               | 1                | 0              | -0.978572               | 1.686939  | -2.739536 |
| 19               | 1                | 0              | -1.691390               | 3.898403  | -1.862315 |
| 20               | 1                | 0              | -1.522614               | 4.395517  | 0.553667  |

|    |    |   |           |           |           |
|----|----|---|-----------|-----------|-----------|
| 21 | 1  | 0 | -0.561263 | 2.720296  | 2.118499  |
| 22 | 7  | 0 | 0.463428  | 0.278226  | 1.264823  |
| 23 | 6  | 0 | -1.141309 | -1.390351 | -1.537291 |
| 24 | 1  | 0 | -1.289410 | -1.238252 | -2.608568 |
| 25 | 6  | 0 | -2.538136 | -1.313440 | -0.909585 |
| 26 | 1  | 0 | -3.109140 | -2.105234 | -1.393343 |
| 27 | 1  | 0 | -0.792377 | -2.415281 | -1.403243 |
| 28 | 6  | 0 | -2.683643 | -1.529629 | 0.615285  |
| 29 | 8  | 0 | -3.061614 | -0.537545 | 1.274181  |
| 30 | 8  | 0 | -2.450205 | -2.686033 | 1.012790  |
| 31 | 7  | 0 | -3.250346 | -0.040033 | -1.252446 |
| 32 | 1  | 0 | -3.042397 | 0.291789  | -2.196243 |
| 33 | 1  | 0 | -4.259901 | -0.181859 | -1.180628 |
| 34 | 1  | 0 | -3.012755 | 0.681606  | -0.565444 |
| 35 | 8  | 0 | 2.220986  | -0.613955 | 0.114896  |
| 36 | 1  | 0 | 2.626830  | 1.182156  | -0.739019 |
| 37 | 17 | 0 | 3.190260  | -1.930077 | -0.313603 |

## Standard orientation of TS-T1-O-h1

Cartesian coordinates of the transition state optimized at the M06-2X/6-311+G(d) level:

Standard orientation of transition state of TS-T1-O<sup>-</sup>-h1

State=1-A

Charge = -2 Multiplicity = 1

Lowest Harmonic Vibrational Frequency (LHVF) = -267.18 cm<sup>-1</sup>

Standard orientation:

| Center<br>Number | Atomic<br>Number | Atomic<br>Type | Coordinates (Angstroms) |           |           |
|------------------|------------------|----------------|-------------------------|-----------|-----------|
|                  |                  |                | X                       | Y         | Z         |
| 1                | 8                | 0              | 4.243000                | -2.299406 | 0.633689  |
| 2                | 1                | 0              | 4.257137                | -3.263291 | 0.719100  |
| 3                | 8                | 0              | 3.419875                | -0.468110 | 2.520578  |
| 4                | 1                | 0              | 3.784070                | -1.212202 | 2.005693  |
| 5                | 1                | 0              | 4.104567                | -0.205708 | 3.145728  |
| 6                | 8                | 0              | 5.820855                | -0.092544 | -0.113976 |
| 7                | 1                | 0              | 5.495432                | -0.970980 | 0.137940  |
| 8                | 1                | 0              | 5.061929                | 0.506407  | 0.016937  |
| 9                | 8                | 0              | 3.520584                | 1.381561  | 0.474582  |

|    |    |   |           |           |           |
|----|----|---|-----------|-----------|-----------|
| 10 | 1  | 0 | 3.330248  | 0.785540  | 1.226914  |
| 11 | 17 | 0 | 2.887435  | -1.912508 | -0.535856 |
| 12 | 1  | 0 | 2.886886  | 1.162449  | -0.222535 |
| 13 | 8  | 0 | -2.743063 | 1.702621  | 1.554267  |
| 14 | 17 | 0 | 0.760162  | 3.719359  | -0.573409 |
| 15 | 17 | 0 | -0.439631 | 0.008148  | 2.257398  |
| 16 | 8  | 0 | -2.857641 | 1.199763  | -0.618875 |
| 17 | 6  | 0 | 0.324508  | 1.164326  | -0.796949 |
| 18 | 6  | 0 | -0.327618 | -0.095297 | -0.439729 |
| 19 | 6  | 0 | 0.074346  | -1.252261 | -1.060411 |
| 20 | 6  | 0 | 1.081240  | -1.292879 | -2.053626 |
| 21 | 6  | 0 | 1.616702  | -0.063023 | -2.486448 |
| 22 | 6  | 0 | 1.271138  | 1.119084  | -1.881623 |
| 23 | 6  | 0 | -2.385279 | 1.076430  | 0.544716  |
| 24 | 6  | 0 | -1.365585 | -0.100541 | 0.660916  |
| 25 | 1  | 0 | -0.361206 | -2.203094 | -0.772649 |
| 26 | 1  | 0 | 1.235663  | -2.197166 | -2.628157 |
| 27 | 1  | 0 | 2.339040  | -0.050247 | -3.296955 |
| 28 | 1  | 0 | 1.721783  | 2.041846  | -2.221540 |
| 29 | 7  | 0 | -0.014234 | 2.215067  | -0.071702 |
| 30 | 6  | 0 | -2.192171 | -1.399557 | 0.793141  |
| 31 | 1  | 0 | -2.683768 | -1.371975 | 1.765161  |
| 32 | 1  | 0 | -1.517991 | -2.254304 | 0.819345  |
| 33 | 6  | 0 | -3.324247 | -1.660475 | -0.209864 |
| 34 | 6  | 0 | -4.671539 | -0.951371 | 0.094738  |
| 35 | 8  | 0 | -4.942371 | -0.744492 | 1.294148  |
| 36 | 8  | 0 | -5.401024 | -0.717441 | -0.897927 |
| 37 | 1  | 0 | -3.548559 | -2.728850 | -0.170377 |
| 38 | 7  | 0 | -2.980632 | -1.363649 | -1.631108 |
| 39 | 1  | 0 | -2.242115 | -1.963986 | -1.996279 |
| 40 | 1  | 0 | -3.825973 | -1.480422 | -2.195401 |
| 41 | 1  | 0 | -2.699201 | -0.371146 | -1.692572 |

---

### Standard orientation of TS-T1-OCI-h1

Cartesian coordinates of the transition state optimized at the M06-2X/6-311+G(d) level:

Standard orientation of transition state of TS-T1-OCI-h1

State=1-A

Charge = -1 Multiplicity = 1

Lowest Harmonic Vibrational Frequency (LHVF) = -425.50 cm<sup>-1</sup>

Standard orientation:

---

| Center<br>Number | Atomic<br>Number | Atomic<br>Type | Coordinates (Angstroms) |           |           |
|------------------|------------------|----------------|-------------------------|-----------|-----------|
|                  |                  |                | X                       | Y         | Z         |
| 1                | 8                | 0              | 5.394951                | -1.117318 | 0.703008  |
| 2                | 1                | 0              | 5.798201                | -1.993748 | 0.692884  |
| 3                | 8                | 0              | 3.886690                | -0.115844 | 2.651944  |
| 4                | 1                | 0              | 4.511826                | -0.554969 | 2.024885  |
| 5                | 1                | 0              | 4.421935                | 0.286023  | 3.344720  |
| 6                | 8                | 0              | 5.675602                | 1.471774  | -0.146046 |
| 7                | 1                | 0              | 5.757926                | 0.526889  | 0.084900  |
| 8                | 1                | 0              | 4.781635                | 1.721069  | 0.149672  |
| 9                | 8                | 0              | 3.097021                | 1.859109  | 0.914475  |
| 10               | 1                | 0              | 3.264010                | 1.159401  | 1.581420  |
| 11               | 17               | 0              | 3.727499                | -1.328983 | -0.494029 |
| 12               | 1                | 0              | 2.514232                | 1.469246  | 0.252932  |
| 13               | 8                | 0              | -2.203299               | 1.460420  | 1.123958  |
| 14               | 17               | 0              | -0.946708               | 2.852998  | -1.577254 |
| 15               | 17               | 0              | 0.039946                | 0.067352  | 2.119077  |
| 16               | 8                | 0              | -2.611130               | 0.297801  | -0.833193 |
| 17               | 6                | 0              | 0.327397                | 0.582694  | -1.147589 |
| 18               | 6                | 0              | 0.192230                | -0.655350 | -0.437372 |
| 19               | 6                | 0              | 0.988191                | -1.708880 | -0.743890 |
| 20               | 6                | 0              | 2.023004                | -1.558126 | -1.733764 |
| 21               | 6                | 0              | 2.076570                | -0.327363 | -2.475390 |
| 22               | 6                | 0              | 1.276052                | 0.741532  | -2.183251 |
| 23               | 6                | 0              | -1.749318               | 0.653150  | 0.022862  |
| 24               | 6                | 0              | -0.864096               | -0.505022 | 0.623291  |
| 25               | 1                | 0              | 0.890282                | -2.660006 | -0.230116 |
| 26               | 1                | 0              | 2.367188                | -2.454514 | -2.235946 |
| 27               | 1                | 0              | 2.807407                | -0.246607 | -3.272318 |
| 28               | 1                | 0              | 1.352127                | 1.673141  | -2.728815 |
| 29               | 7                | 0              | -0.551992               | 1.468793  | -0.665620 |
| 30               | 6                | 0              | -1.615971               | -1.765443 | 1.058814  |
| 31               | 1                | 0              | -2.106535               | -1.558277 | 2.009308  |
| 32               | 1                | 0              | -0.859656               | -2.527418 | 1.259378  |
| 33               | 6                | 0              | -2.700096               | -2.365545 | 0.162015  |
| 34               | 6                | 0              | -4.109087               | -1.738111 | 0.283238  |
| 35               | 8                | 0              | -4.422580               | -1.263419 | 1.393886  |
| 36               | 8                | 0              | -4.838069               | -1.841006 | -0.730954 |
| 37               | 1                | 0              | -2.817851               | -3.407244 | 0.469786  |
| 38               | 7                | 0              | -2.336784               | -2.404160 | -1.282379 |
| 39               | 1                | 0              | -1.470002               | -2.914880 | -1.456383 |
| 40               | 1                | 0              | -3.097013               | -2.844426 | -1.805183 |
| 41               | 1                | 0              | -2.252297               | -1.431806 | -1.616293 |



42            17            0            -3.558662    2.418769    0.771073

---

## Standard orientation of TS-T1-OH-h2

Cartesian coordinates of the transition state optimized at the M06-2X/6-311+G(d) level:

Standard orientation of transition state of TS-T1-OH-h2

State=1-A

Charge = -2 Multiplicity = 1

Lowest Harmonic Vibrational Frequency (LHVF) = -1286.34 cm<sup>-1</sup>

Standard orientation:

---

| Center<br>Number | Atomic<br>Number | Atomic<br>Type | Coordinates (Angstroms) |           |           |
|------------------|------------------|----------------|-------------------------|-----------|-----------|
|                  |                  |                | X                       | Y         | Z         |
| 1                | 8                | 0              | 1.054548                | 0.087291  | 2.917456  |
| 2                | 17               | 0              | 3.089250                | 2.225244  | -0.154820 |
| 3                | 17               | 0              | -1.275573               | -2.110603 | 2.177315  |
| 4                | 8                | 0              | -0.925333               | 1.118632  | 2.857446  |
| 5                | 6                | 0              | 1.863817                | -0.164943 | -0.047351 |
| 6                | 6                | 0              | 0.774937                | -0.994778 | 0.317843  |
| 7                | 6                | 0              | 0.769172                | -2.303589 | -0.155601 |
| 8                | 6                | 0              | 1.774258                | -2.794483 | -0.985492 |
| 9                | 6                | 0              | 2.818016                | -1.963168 | -1.354238 |
| 10               | 6                | 0              | 2.864083                | -0.654790 | -0.879969 |
| 11               | 6                | 0              | -0.065962               | 0.335763  | 2.408665  |
| 12               | 6                | 0              | -0.392893               | -0.392126 | 1.067223  |
| 13               | 1                | 0              | -0.048325               | -2.957158 | 0.117056  |
| 14               | 1                | 0              | 1.724377                | -3.816174 | -1.343028 |
| 15               | 1                | 0              | 3.607997                | -2.321311 | -2.004476 |
| 16               | 1                | 0              | 3.688669                | -0.017115 | -1.168448 |
| 17               | 7                | 0              | 1.824617                | 1.183822  | 0.415208  |
| 18               | 1                | 0              | 1.889152                | 1.200141  | 1.432827  |
| 19               | 6                | 0              | -1.430530               | 0.216122  | 0.294624  |
| 20               | 1                | 0              | -0.926060               | 1.415023  | -0.067478 |
| 21               | 1                | 0              | -2.228101               | 0.605653  | 0.928007  |
| 22               | 6                | 0              | -2.007087               | -0.401072 | -0.958773 |
| 23               | 6                | 0              | -1.063289               | -0.753060 | -2.129929 |
| 24               | 8                | 0              | -0.281061               | 0.151610  | -2.489606 |
| 25               | 8                | 0              | -1.218904               | -1.875946 | -2.664233 |
| 26               | 1                | 0              | -2.720947               | 0.313709  | -1.375030 |
| 27               | 7                | 0              | -2.842490               | -1.612427 | -0.628201 |
| 28               | 1                | 0              | -3.260871               | -2.000634 | -1.475796 |

|    |    |   |           |           |           |
|----|----|---|-----------|-----------|-----------|
| 29 | 1  | 0 | -2.276352 | -2.347288 | -0.197114 |
| 30 | 1  | 0 | -3.582269 | -1.368367 | 0.033366  |
| 31 | 8  | 0 | -0.723217 | 2.635440  | -0.411509 |
| 32 | 17 | 0 | -2.250004 | 3.213493  | -0.877046 |

## Standard orientation of TS-T1-OCI-h2

Cartesian coordinates of the transition state optimized at the M06-2X/6-311+G(d) level:

Standard orientation of transition state of TS-T1-OCI-h2

State=1-A

Charge = -1 Multiplicity = 1

Lowest Harmonic Vibrational Frequency (LHVF) = -1313.80 cm<sup>-1</sup>

Standard orientation:

| Center Number | Atomic Number | Atomic Type | Coordinates (Angstroms) |           |           |
|---------------|---------------|-------------|-------------------------|-----------|-----------|
|               |               |             | X                       | Y         | Z         |
| 1             | 8             | 0           | -2.531210               | -0.535377 | -0.738742 |
| 2             | 17            | 0           | -0.603356               | 0.215108  | 3.237523  |
| 3             | 17            | 0           | -0.438262               | -0.579361 | -2.923992 |
| 4             | 8             | 0           | -1.978828               | 1.653583  | -0.876192 |
| 5             | 6             | 0           | -0.431139               | -1.424927 | 1.161774  |
| 6             | 6             | 0           | 0.039406                | -1.304469 | -0.152692 |
| 7             | 6             | 0           | 0.791234                | -2.351189 | -0.685999 |
| 8             | 6             | 0           | 1.080240                | -3.480562 | 0.070132  |
| 9             | 6             | 0           | 0.601995                | -3.592745 | 1.371140  |
| 10            | 6             | 0           | -0.159684               | -2.565104 | 1.910879  |
| 11            | 6             | 0           | -1.651263               | 0.508377  | -0.825497 |
| 12            | 6             | 0           | -0.220163               | -0.018805 | -0.905544 |
| 13            | 1             | 0           | 1.157427                | -2.288556 | -1.702638 |
| 14            | 1             | 0           | 1.676734                | -4.274363 | -0.363966 |
| 15            | 1             | 0           | 0.814996                | -4.476489 | 1.961018  |
| 16            | 1             | 0           | -0.541157               | -2.635826 | 2.923861  |
| 17            | 7             | 0           | -1.226978               | -0.341071 | 1.690801  |
| 18            | 1             | 0           | -2.151348               | -0.702172 | 1.925883  |
| 19            | 6             | 0           | 0.733529                | 1.052687  | -0.796868 |
| 20            | 1             | 0           | 0.530792                | 1.717144  | 0.405053  |
| 21            | 1             | 0           | 0.444495                | 1.900683  | -1.421358 |
| 22            | 6             | 0           | 2.219784                | 0.822843  | -0.893564 |
| 23            | 6             | 0           | 2.886763                | -0.178419 | 0.078617  |
| 24            | 8             | 0           | 2.613464                | -0.029142 | 1.287761  |
| 25            | 8             | 0           | 3.689414                | -0.999071 | -0.421818 |

|    |    |   |           |           |           |
|----|----|---|-----------|-----------|-----------|
| 26 | 1  | 0 | 2.704923  | 1.782922  | -0.698798 |
| 27 | 7  | 0 | 2.643410  | 0.472499  | -2.301273 |
| 28 | 1  | 0 | 3.661226  | 0.498020  | -2.386788 |
| 29 | 1  | 0 | 2.346035  | -0.471555 | -2.555511 |
| 30 | 1  | 0 | 2.238523  | 1.125793  | -2.974528 |
| 31 | 8  | 0 | 0.443391  | 2.545632  | 1.314101  |
| 32 | 17 | 0 | 0.734291  | 4.041589  | 0.566492  |
| 33 | 17 | 0 | -4.165126 | -0.088320 | -0.724381 |

### Standard orientation of TS-T1-OH-i-1

Cartesian coordinates of the transition state optimized at the M06-2X/6-311G(d) level:

Standard orientation of transition state of TS-T1-OH-i-1

State=1-A

Charge = 0 Multiplicity = 1

Lowest Harmonic Vibrational Frequency (LHVF) = -162.71 cm<sup>-1</sup>

Standard orientation:

| Center Number | Atomic Number | Atomic Type | Coordinates (Angstroms) |           |           |
|---------------|---------------|-------------|-------------------------|-----------|-----------|
|               |               |             | X                       | Y         | Z         |
| 1             | 8             | 0           | 1.005142                | 2.110444  | 1.106162  |
| 2             | 6             | 0           | -1.776037               | 0.047923  | 1.039176  |
| 3             | 6             | 0           | -1.168712               | -0.391163 | -0.179110 |
| 4             | 6             | 0           | -1.847653               | -1.291497 | -1.041859 |
| 5             | 6             | 0           | -3.073537               | -1.753209 | -0.656983 |
| 6             | 6             | 0           | -3.650339               | -1.331807 | 0.578620  |
| 7             | 6             | 0           | -3.031821               | -0.453734 | 1.433194  |
| 8             | 6             | 0           | 0.317235                | 0.911950  | 1.036525  |
| 9             | 6             | 0           | 0.042275                | 0.280126  | -0.304068 |
| 10            | 1             | 0           | -1.388670               | -1.595984 | -1.976249 |
| 11            | 1             | 0           | -3.622550               | -2.446639 | -1.281183 |
| 12            | 1             | 0           | -4.623417               | -1.725423 | 0.850397  |
| 13            | 1             | 0           | -3.487896               | -0.143402 | 2.364812  |
| 14            | 1             | 0           | -1.085638               | 1.148216  | 2.648351  |
| 15            | 1             | 0           | 0.883977                | 0.116802  | 1.562792  |
| 16            | 7             | 0           | -0.991617               | 0.947290  | 1.659900  |
| 17            | 6             | 0           | 1.108247                | 0.096138  | -1.328640 |
| 18            | 1             | 0           | 1.613379                | 1.048684  | -1.483228 |
| 19            | 1             | 0           | 0.659611                | -0.211444 | -2.274269 |
| 20            | 6             | 0           | 2.192164                | -0.908192 | -0.923354 |
| 21            | 6             | 0           | 2.985412                | -0.538564 | 0.352342  |

|    |    |   |           |           |           |
|----|----|---|-----------|-----------|-----------|
| 22 | 8  | 0 | 3.275624  | 0.674126  | 0.477118  |
| 23 | 8  | 0 | 3.271413  | -1.478176 | 1.114434  |
| 24 | 1  | 0 | 2.904639  | -0.968667 | -1.747434 |
| 25 | 7  | 0 | 1.637941  | -2.283734 | -0.755717 |
| 26 | 1  | 0 | 1.223932  | -2.637381 | -1.621397 |
| 27 | 1  | 0 | 2.386451  | -2.912648 | -0.455260 |
| 28 | 1  | 0 | 0.922271  | -2.314377 | -0.023385 |
| 29 | 17 | 0 | -0.932662 | 2.450264  | -1.498640 |
| 30 | 1  | 0 | 1.944057  | 1.883914  | 0.966896  |

### Standard orientation of TS-T1-OCI-i-1

Cartesian coordinates of the transition state optimized at the M06-2X/6-311G(d) level:

Standard orientation of transition state of TS-T1-OCI-i-1

State=1-A

Charge = 0 Multiplicity = 1

Lowest Harmonic Vibrational Frequency (LHVF) = -93.42 cm<sup>-1</sup>

Standard orientation:

| Center Number | Atomic Number | Atomic Type | Coordinates (Angstroms) |           |           |
|---------------|---------------|-------------|-------------------------|-----------|-----------|
|               |               |             | X                       | Y         | Z         |
| 1             | 8             | 0           | 1.478625                | -1.614182 | 0.240771  |
| 2             | 6             | 0           | -1.651450               | -0.805342 | -0.944894 |
| 3             | 6             | 0           | -1.466786               | 0.217358  | 0.043801  |
| 4             | 6             | 0           | -2.561370               | 1.038143  | 0.444671  |
| 5             | 6             | 0           | -3.760035               | 0.856020  | -0.174373 |
| 6             | 6             | 0           | -3.909920               | -0.137007 | -1.194352 |
| 7             | 6             | 0           | -2.890584               | -0.959916 | -1.596367 |
| 8             | 6             | 0           | 0.554311                | -0.808623 | -0.434828 |
| 9             | 6             | 0           | -0.160444               | 0.151917  | 0.483181  |
| 10            | 1             | 0           | -2.423718               | 1.784137  | 1.220091  |
| 11            | 1             | 0           | -4.616899               | 1.460508  | 0.093625  |
| 12            | 1             | 0           | -4.880590               | -0.241917 | -1.665716 |
| 13            | 1             | 0           | -3.024623               | -1.710282 | -2.364877 |
| 14            | 1             | 0           | -0.356156               | -2.061132 | -1.942785 |
| 15            | 1             | 0           | 1.065440                | -0.190553 | -1.189684 |
| 16            | 7             | 0           | -0.524455               | -1.515839 | -1.104610 |
| 17            | 6             | 0           | 0.555868                | 1.064817  | 1.416986  |
| 18            | 1             | 0           | 1.362904                | 0.519941  | 1.904557  |
| 19            | 1             | 0           | -0.137510               | 1.413184  | 2.184037  |
| 20            | 6             | 0           | 1.199064                | 2.272248  | 0.715866  |

|    |    |   |           |           |           |
|----|----|---|-----------|-----------|-----------|
| 21 | 6  | 0 | 2.173302  | 1.840619  | -0.400409 |
| 22 | 8  | 0 | 3.148371  | 1.170008  | -0.016732 |
| 23 | 8  | 0 | 1.855332  | 2.159877  | -1.566466 |
| 24 | 1  | 0 | 1.733678  | 2.846993  | 1.470073  |
| 25 | 7  | 0 | 0.163542  | 3.175525  | 0.134828  |
| 26 | 1  | 0 | -0.239721 | 2.759600  | -0.710028 |
| 27 | 1  | 0 | -0.585637 | 3.382672  | 0.800385  |
| 28 | 1  | 0 | 0.590512  | 4.057965  | -0.155495 |
| 29 | 17 | 0 | -0.617864 | -1.677016 | 2.482152  |
| 30 | 17 | 0 | 2.599532  | -2.308040 | -0.851092 |

### Standard orientation of TS-T1-OH-OH-i-2

Cartesian coordinates of the transition state optimized at the M06-2X/6-311G(d) level:

Standard orientation of transition state of TS-T1-OH-OH-i-2

State=1-A

Charge = 1 Multiplicity = 1

Lowest Harmonic Vibrational Frequency (LHVF) = -308.50 cm<sup>-1</sup>

Standard orientation:

| Center Number | Atomic Number | Atomic Type | Coordinates (Angstroms) |           |           |
|---------------|---------------|-------------|-------------------------|-----------|-----------|
|               |               |             | X                       | Y         | Z         |
| 1             | 8             | 0           | -0.776141               | 3.447338  | 0.861257  |
| 2             | 1             | 0           | -0.718717               | 3.234452  | -0.091823 |
| 3             | 1             | 0           | -0.880086               | 4.402131  | 0.931341  |
| 4             | 8             | 0           | -0.906252               | 2.495435  | -1.714609 |
| 5             | 1             | 0           | -1.817660               | 2.131074  | -1.629201 |
| 6             | 1             | 0           | -0.073010               | 1.072747  | -2.132614 |
| 7             | 8             | 0           | 0.376211                | 0.201317  | -2.241871 |
| 8             | 8             | 0           | -3.280469               | 1.316679  | -1.225366 |
| 9             | 1             | 0           | -3.304769               | 1.489735  | -0.257294 |
| 10            | 1             | 0           | -4.035781               | 1.772953  | -1.612250 |
| 11            | 8             | 0           | -3.096002               | 2.134959  | 1.341925  |
| 12            | 1             | 0           | -2.254197               | 2.633683  | 1.267775  |
| 13            | 1             | 0           | -3.036593               | 1.594372  | 2.135794  |
| 14            | 8             | 0           | -3.211053               | -1.332715 | -2.044397 |
| 15            | 1             | 0           | -3.241348               | -0.391927 | -1.790996 |
| 16            | 1             | 0           | -0.917139               | 3.139574  | -2.431128 |
| 17            | 1             | 0           | -0.258295               | -0.409309 | -2.638857 |
| 18            | 1             | 0           | -2.332929               | -1.485021 | -2.408030 |
| 19            | 8             | 0           | 0.240930                | -2.439141 | -1.615922 |

|    |   |   |           |           |           |
|----|---|---|-----------|-----------|-----------|
| 20 | 6 | 0 | 2.857720  | -0.496232 | -0.442299 |
| 21 | 6 | 0 | 1.776560  | 0.286834  | 0.046193  |
| 22 | 6 | 0 | 1.991072  | 1.556598  | 0.625468  |
| 23 | 6 | 0 | 3.285407  | 1.990444  | 0.758749  |
| 24 | 6 | 0 | 4.360960  | 1.180349  | 0.310265  |
| 25 | 6 | 0 | 4.178541  | -0.050787 | -0.282382 |
| 26 | 6 | 0 | 1.016063  | -1.804852 | -0.651950 |
| 27 | 6 | 0 | 0.595239  | -0.408911 | -0.259944 |
| 28 | 1 | 0 | 1.147129  | 2.158352  | 0.948035  |
| 29 | 1 | 0 | 3.500167  | 2.952419  | 1.206503  |
| 30 | 1 | 0 | 5.372275  | 1.551093  | 0.435598  |
| 31 | 1 | 0 | 5.014774  | -0.646797 | -0.625791 |
| 32 | 1 | 0 | 3.002480  | -2.447944 | -1.076389 |
| 33 | 1 | 0 | 1.008556  | -2.376667 | 0.291752  |
| 34 | 7 | 0 | 2.404948  | -1.629879 | -1.044560 |
| 35 | 6 | 0 | -0.802373 | -0.096092 | 0.159495  |
| 36 | 1 | 0 | -1.478609 | -0.454755 | -0.613627 |
| 37 | 1 | 0 | -0.931274 | 0.982940  | 0.252772  |
| 38 | 6 | 0 | -1.270964 | -0.767556 | 1.449991  |
| 39 | 6 | 0 | -1.162116 | -2.307597 | 1.466523  |
| 40 | 8 | 0 | -1.559442 | -2.879687 | 0.424172  |
| 41 | 8 | 0 | -0.714052 | -2.822222 | 2.504517  |
| 42 | 1 | 0 | -2.326678 | -0.518227 | 1.566630  |
| 43 | 7 | 0 | -0.579008 | -0.203258 | 2.643932  |
| 44 | 1 | 0 | -0.795518 | 0.790504  | 2.758140  |
| 45 | 1 | 0 | -0.873315 | -0.713340 | 3.480346  |
| 46 | 1 | 0 | 0.437491  | -0.306893 | 2.578435  |
| 47 | 1 | 0 | -0.535027 | -2.792077 | -1.139027 |

## Standard orientation of TS-T1-OCI-OH-i-2

Cartesian coordinates of the transition state optimized at the M06-2X/6-311G(d) level:

Standard orientation of transition state of TS-T1-OCI-OH-i-2

State=1-A

Charge = 1 Multiplicity = 1

Lowest Harmonic Vibrational Frequency (LHVF) = -262.56 cm<sup>-1</sup>

Standard orientation:

| Center Number | Atomic Number | Atomic Type | Coordinates (Angstroms) |          |          |
|---------------|---------------|-------------|-------------------------|----------|----------|
|               |               |             | X                       | Y        | Z        |
| 1             | 8             | 0           | -3.282284               | 1.738165 | 0.386130 |

|    |    |   |           |           |           |
|----|----|---|-----------|-----------|-----------|
| 2  | 1  | 0 | -3.004154 | 1.649840  | -0.550311 |
| 3  | 1  | 0 | -3.894841 | 2.478798  | 0.446718  |
| 4  | 8  | 0 | -2.349165 | 1.027055  | -2.088700 |
| 5  | 1  | 0 | -2.783943 | 0.144949  | -2.091003 |
| 6  | 1  | 0 | -0.696291 | 0.258578  | -2.259872 |
| 7  | 8  | 0 | 0.110349  | -0.288042 | -2.178289 |
| 8  | 8  | 0 | -3.239374 | -1.486806 | -1.684801 |
| 9  | 1  | 0 | -3.527085 | -1.361515 | -0.750072 |
| 10 | 1  | 0 | -4.003326 | -1.800764 | -2.180451 |
| 11 | 8  | 0 | -3.974333 | -0.885382 | 0.827649  |
| 12 | 1  | 0 | -3.847973 | 0.080786  | 0.750577  |
| 13 | 1  | 0 | -4.920520 | -1.034907 | 0.927727  |
| 14 | 8  | 0 | -0.914124 | -2.800205 | -2.194827 |
| 15 | 1  | 0 | -1.791703 | -2.460793 | -1.923527 |
| 16 | 1  | 0 | -2.655621 | 1.506775  | -2.865797 |
| 17 | 1  | 0 | -0.180149 | -1.225355 | -2.252973 |
| 18 | 1  | 0 | -0.519506 | -3.212623 | -1.418972 |
| 19 | 6  | 0 | 2.201870  | 1.541831  | -0.516992 |
| 20 | 6  | 0 | 0.810713  | 1.482802  | -0.208446 |
| 21 | 6  | 0 | 0.029451  | 2.666941  | -0.165932 |
| 22 | 6  | 0 | 0.662244  | 3.863134  | -0.359057 |
| 23 | 6  | 0 | 2.063283  | 3.906521  | -0.605644 |
| 24 | 6  | 0 | 2.845140  | 2.778038  | -0.684443 |
| 25 | 6  | 0 | 1.771274  | -0.627581 | -0.048833 |
| 26 | 6  | 0 | 0.469669  | 0.136559  | -0.072363 |
| 27 | 1  | 0 | -1.038508 | 2.615862  | 0.013193  |
| 28 | 1  | 0 | 0.104901  | 4.790250  | -0.325988 |
| 29 | 1  | 0 | 2.531034  | 4.874583  | -0.745702 |
| 30 | 1  | 0 | 3.907352  | 2.829797  | -0.886673 |
| 31 | 1  | 0 | 3.721427  | 0.162825  | -0.431521 |
| 32 | 7  | 0 | 2.733277  | 0.297573  | -0.617915 |
| 33 | 6  | 0 | -0.802651 | -0.487165 | 0.396195  |
| 34 | 1  | 0 | -0.798319 | -1.542192 | 0.124846  |
| 35 | 1  | 0 | -1.641816 | -0.013127 | -0.109596 |
| 36 | 6  | 0 | -1.017325 | -0.416762 | 1.917793  |
| 37 | 1  | 0 | 2.024966  | -0.799432 | 1.006402  |
| 38 | 8  | 0 | 1.634431  | -1.851293 | -0.719223 |
| 39 | 17 | 0 | 2.885560  | -2.934542 | -0.310390 |
| 40 | 1  | 0 | -1.868319 | -1.051966 | 2.150738  |
| 41 | 7  | 0 | -1.374400 | 0.963727  | 2.348433  |
| 42 | 1  | 0 | -2.068361 | 1.392641  | 1.706015  |
| 43 | 1  | 0 | -1.769669 | 0.944018  | 3.290587  |
| 44 | 1  | 0 | -0.529420 | 1.539744  | 2.403276  |
| 45 | 6  | 0 | 0.236940  | -0.896552 | 2.671703  |

|    |   |   |          |           |          |
|----|---|---|----------|-----------|----------|
| 46 | 8 | 0 | 0.892369 | -0.022229 | 3.275696 |
| 47 | 8 | 0 | 0.504571 | -2.105670 | 2.525302 |

-----

### Standard orientation of TS-T1-OH-OCI-i-2

Cartesian coordinates of the transition state optimized at the M06-2X/6-311G(d) level:

Standard orientation of transition state of TS-T1-OH-OCI-i-2

State=1-A

Charge = 0 Multiplicity = 1

Lowest Harmonic Vibrational Frequency (LHVF) = -64.94 cm<sup>-1</sup>

Standard orientation:

-----

| Center<br>Number | Atomic<br>Number | Atomic<br>Type | Coordinates (Angstroms) |           |           |
|------------------|------------------|----------------|-------------------------|-----------|-----------|
|                  |                  |                | X                       | Y         | Z         |
| 1                | 8                | 0              | 1.842285                | 1.132281  | 2.624040  |
| 2                | 1                | 0              | 1.714937                | 1.288120  | 1.647249  |
| 3                | 8                | 0              | 1.488893                | 1.621170  | 0.059887  |
| 4                | 1                | 0              | 2.433831                | 0.376988  | 2.692601  |
| 5                | 8                | 0              | -0.917715               | 1.410138  | -1.900203 |
| 6                | 6                | 0              | 1.273333                | -1.161654 | -1.312924 |
| 7                | 6                | 0              | 0.783576                | -0.981441 | 0.029645  |
| 8                | 6                | 0              | 1.416492                | -1.641855 | 1.125994  |
| 9                | 6                | 0              | 2.469800                | -2.459315 | 0.858500  |
| 10               | 6                | 0              | 2.926603                | -2.645799 | -0.488692 |
| 11               | 6                | 0              | 2.354949                | -2.033040 | -1.570191 |
| 12               | 6                | 0              | -0.587509               | 0.127480  | -1.483906 |
| 13               | 6                | 0              | -0.251258               | -0.081353 | -0.030361 |
| 14               | 1                | 0              | 1.042238                | -1.495334 | 2.132475  |
| 15               | 1                | 0              | 2.975647                | -2.988370 | 1.655923  |
| 16               | 1                | 0              | 3.767657                | -3.310374 | -0.651875 |
| 17               | 1                | 0              | 2.715295                | -2.189368 | -2.578773 |
| 18               | 1                | 0              | 0.584404                | -0.561028 | -3.170440 |
| 19               | 1                | 0              | -1.422849               | -0.570012 | -1.681857 |
| 20               | 7                | 0              | 0.570546                | -0.418516 | -2.167745 |
| 21               | 6                | 0              | -1.068848               | 0.493016  | 1.067833  |
| 22               | 1                | 0              | -1.242228               | 1.547028  | 0.841520  |
| 23               | 1                | 0              | -0.517619               | 0.431790  | 2.006717  |
| 24               | 6                | 0              | -2.447106               | -0.154016 | 1.219938  |
| 25               | 6                | 0              | -3.336496               | -0.077719 | -0.041890 |
| 26               | 8                | 0              | -3.334214               | 1.026905  | -0.635300 |
| 27               | 8                | 0              | -3.971197               | -1.104937 | -0.335066 |

-----



|    |    |   |           |           |           |
|----|----|---|-----------|-----------|-----------|
| 28 | 1  | 0 | -2.969741 | 0.355392  | 2.030133  |
| 29 | 7  | 0 | -2.325366 | -1.582404 | 1.636297  |
| 30 | 1  | 0 | -1.861628 | -1.671100 | 2.543073  |
| 31 | 1  | 0 | -3.256529 | -2.002002 | 1.688471  |
| 32 | 1  | 0 | -1.796849 | -2.130187 | 0.951006  |
| 33 | 1  | 0 | -1.841979 | 1.547899  | -1.616186 |
| 34 | 17 | 0 | 1.758443  | 3.316865  | 0.028209  |

-----

### Standard orientation of TS-T1-OCI-OCI-i-2

Cartesian coordinates of the transition state optimized at the M06-2X/6-311G(d) level:

Standard orientation of transition state of TS-T1-OCI-OCI-i-2

State=1-A

Charge = 0 Multiplicity = 1

Lowest Harmonic Vibrational Frequency (LHVF) = -64.40 cm<sup>-1</sup>

Standard orientation:

-----

| Center Number | Atomic Number | Atomic Type | Coordinates (Angstroms) |           |           |
|---------------|---------------|-------------|-------------------------|-----------|-----------|
|               |               |             | X                       | Y         | Z         |
| 1             | 8             | 0           | 1.890819                | -0.176701 | 3.053494  |
| 2             | 1             | 0           | 1.831653                | 0.204896  | 2.141015  |
| 3             | 8             | 0           | 1.686049                | 0.997324  | 0.656156  |
| 4             | 1             | 0           | 2.416986                | -0.977739 | 2.970914  |
| 5             | 8             | 0           | -1.125866               | 1.702922  | -1.509587 |
| 6             | 6             | 0           | 0.999170                | -1.072909 | -1.638982 |
| 7             | 6             | 0           | 0.615253                | -1.161533 | -0.257845 |
| 8             | 6             | 0           | 1.226695                | -2.123998 | 0.597642  |
| 9             | 6             | 0           | 2.140173                | -2.977607 | 0.056964  |
| 10            | 6             | 0           | 2.479446                | -2.895785 | -1.329316 |
| 11            | 6             | 0           | 1.929117                | -1.975980 | -2.185423 |
| 12            | 6             | 0           | -0.702939               | 0.384466  | -1.359598 |
| 13            | 6             | 0           | -0.294494               | -0.155383 | -0.008625 |
| 14            | 1             | 0           | 0.950318                | -2.168289 | 1.644368  |
| 15            | 1             | 0           | 2.620536                | -3.730550 | 0.668332  |
| 16            | 1             | 0           | 3.209237                | -3.596835 | -1.718518 |
| 17            | 1             | 0           | 2.201909                | -1.928217 | -3.231718 |
| 18            | 1             | 0           | 0.236291                | -0.024366 | -3.250679 |
| 19            | 1             | 0           | -1.622136               | -0.172893 | -1.615019 |
| 20            | 7             | 0           | 0.352697                | -0.062097 | -2.244230 |
| 21            | 6             | 0           | -1.003638               | 0.192782  | 1.251308  |
| 22            | 1             | 0           | -1.223092               | 1.262180  | 1.251734  |

-----

|    |    |   |           |           |           |
|----|----|---|-----------|-----------|-----------|
| 23 | 1  | 0 | -0.351365 | -0.026949 | 2.097603  |
| 24 | 6  | 0 | -2.344971 | -0.535739 | 1.435223  |
| 25 | 6  | 0 | -3.296251 | -0.306367 | 0.242813  |
| 26 | 8  | 0 | -3.695259 | 0.863355  | 0.105059  |
| 27 | 8  | 0 | -3.517367 | -1.298122 | -0.486841 |
| 28 | 1  | 0 | -2.802872 | -0.170039 | 2.351982  |
| 29 | 7  | 0 | -2.127630 | -2.002147 | 1.608843  |
| 30 | 1  | 0 | -1.370181 | -2.206322 | 2.265811  |
| 31 | 1  | 0 | -2.979858 | -2.448824 | 1.954727  |
| 32 | 1  | 0 | -1.919117 | -2.435303 | 0.704018  |
| 33 | 17 | 0 | 2.221134  | 2.533215  | 1.178230  |
| 34 | 17 | 0 | 0.063210  | 2.874259  | -1.128706 |

### Standard orientation of TS-T1-OH-OH-j1

Cartesian coordinates of the transition state optimized at the M06-2X/6-311G(d) level:

Standard orientation of transition state of TS-T1-OH-OH-j1

State=1-A

Charge = 0 Multiplicity = 1

Lowest Harmonic Vibrational Frequency (LHVF) = -663.60 cm<sup>-1</sup>

Standard orientation:

| Center<br>Number | Atomic<br>Number | Atomic<br>Type | Coordinates (Angstroms) |           |           |
|------------------|------------------|----------------|-------------------------|-----------|-----------|
|                  |                  |                | X                       | Y         | Z         |
| 1                | 1                | 0              | 1.104126                | -0.561928 | 1.473271  |
| 2                | 8                | 0              | 3.936564                | 0.108341  | 2.193872  |
| 3                | 1                | 0              | 3.963627                | 1.068547  | 2.260058  |
| 4                | 17               | 0              | 2.058112                | -0.794408 | -0.789225 |
| 5                | 8                | 0              | 1.602595                | -0.715324 | 2.484628  |
| 6                | 1                | 0              | 1.601888                | -1.654041 | 2.713473  |
| 7                | 1                | 0              | 2.590206                | -0.389235 | 2.391608  |
| 8                | 8                | 0              | 4.074428                | -1.363274 | -1.937730 |
| 9                | 1                | 0              | 4.397262                | -0.156062 | 1.332244  |
| 10               | 1                | 0              | 4.054682                | -0.612393 | -2.539774 |
| 11               | 8                | 0              | 5.236482                | -0.560190 | 0.079783  |
| 12               | 1                | 0              | 4.726510                | -0.914246 | -0.807772 |
| 13               | 1                | 0              | 5.852438                | -1.247739 | 0.349991  |
| 14               | 6                | 0              | 0.390406                | 1.129348  | 0.070640  |
| 15               | 6                | 0              | -0.771396               | 1.363018  | -0.659024 |
| 16               | 6                | 0              | -1.208303               | 2.662749  | -0.863653 |
| 17               | 6                | 0              | -0.453623               | 3.708460  | -0.329775 |

|    |   |   |           |           |           |
|----|---|---|-----------|-----------|-----------|
| 18 | 6 | 0 | 0.714895  | 3.454882  | 0.389406  |
| 19 | 6 | 0 | 1.156114  | 2.150413  | 0.605294  |
| 20 | 6 | 0 | -0.654255 | -0.910999 | -0.121947 |
| 21 | 6 | 0 | -1.314264 | 0.039670  | -1.145388 |
| 22 | 1 | 0 | -2.113751 | 2.863425  | -1.427243 |
| 23 | 1 | 0 | -0.777719 | 4.731850  | -0.476704 |
| 24 | 1 | 0 | 1.285270  | 4.282682  | 0.793503  |
| 25 | 1 | 0 | 2.062018  | 1.934947  | 1.162097  |
| 26 | 7 | 0 | 0.654799  | -0.276439 | 0.222789  |
| 27 | 6 | 0 | -2.832920 | -0.103825 | -1.279475 |
| 28 | 1 | 0 | -3.013277 | -1.020649 | -1.843994 |
| 29 | 1 | 0 | -3.190089 | 0.722672  | -1.900082 |
| 30 | 6 | 0 | -3.695541 | -0.217318 | -0.030898 |
| 31 | 6 | 0 | -3.457690 | -1.474504 | 0.840433  |
| 32 | 8 | 0 | -3.158020 | -2.522196 | 0.220737  |
| 33 | 8 | 0 | -3.609939 | -1.328714 | 2.067101  |
| 34 | 1 | 0 | -4.736394 | -0.263627 | -0.357283 |
| 35 | 7 | 0 | -3.613908 | 0.990469  | 0.849363  |
| 36 | 1 | 0 | -3.871518 | 1.842906  | 0.346967  |
| 37 | 1 | 0 | -4.239266 | 0.864958  | 1.648377  |
| 38 | 1 | 0 | -2.672654 | 1.116897  | 1.232175  |
| 39 | 8 | 0 | -0.500572 | -2.211799 | -0.578388 |
| 40 | 1 | 0 | -1.346698 | -2.656103 | -0.378852 |
| 41 | 8 | 0 | -0.740466 | -0.185830 | -2.427240 |
| 42 | 1 | 0 | -0.723243 | -1.144608 | -2.564593 |
| 43 | 1 | 0 | -1.196679 | -0.880983 | 0.828499  |

## Standard orientation of TS-T1-OCl-OH-j1

Cartesian coordinates of the transition state optimized at the M06-2X/6-311G(d) level:

Standard orientation of transition state of TS-T1-OCl-OH-j1

State=1-A

Charge = 0 Multiplicity = 1

Lowest Harmonic Vibrational Frequency (LHVF) = -430.42 cm<sup>-1</sup>

Standard orientation:

| Center Number | Atomic Number | Atomic Type | Coordinates (Angstroms) |           |          |
|---------------|---------------|-------------|-------------------------|-----------|----------|
|               |               |             | X                       | Y         | Z        |
| 1             | 1             | 0           | 1.124781                | -0.400659 | 1.457225 |
| 2             | 8             | 0           | 3.952383                | 0.332486  | 2.197362 |
| 3             | 1             | 0           | 3.969236                | 1.288538  | 2.311683 |

|    |    |   |           |           |           |
|----|----|---|-----------|-----------|-----------|
| 4  | 17 | 0 | 2.095301  | -0.516708 | -0.869907 |
| 5  | 8  | 0 | 1.634396  | -0.547854 | 2.441955  |
| 6  | 1  | 0 | 1.658845  | -1.485660 | 2.673717  |
| 7  | 1  | 0 | 2.613447  | -0.191253 | 2.357852  |
| 8  | 8  | 0 | 3.969104  | -0.975605 | -1.992591 |
| 9  | 1  | 0 | 4.408877  | 0.119675  | 1.328926  |
| 10 | 1  | 0 | 3.972523  | -0.227383 | -2.598962 |
| 11 | 8  | 0 | 5.268523  | -0.229316 | 0.029240  |
| 12 | 1  | 0 | 4.741922  | -0.536695 | -0.812082 |
| 13 | 1  | 0 | 5.865397  | -0.946080 | 0.264839  |
| 14 | 6  | 0 | 0.378215  | 1.333236  | 0.109958  |
| 15 | 6  | 0 | -0.766312 | 1.613890  | -0.627167 |
| 16 | 6  | 0 | -1.173164 | 2.926830  | -0.812932 |
| 17 | 6  | 0 | -0.414253 | 3.943643  | -0.234943 |
| 18 | 6  | 0 | 0.732866  | 3.646832  | 0.503839  |
| 19 | 6  | 0 | 1.148464  | 2.330673  | 0.688206  |
| 20 | 6  | 0 | -0.654359 | -0.685491 | -0.225250 |
| 21 | 6  | 0 | -1.342293 | 0.328815  | -1.178246 |
| 22 | 1  | 0 | -2.060392 | 3.157256  | -1.393870 |
| 23 | 1  | 0 | -0.715579 | 4.976457  | -0.362344 |
| 24 | 1  | 0 | 1.309340  | 4.452400  | 0.942917  |
| 25 | 1  | 0 | 2.043316  | 2.085700  | 1.250153  |
| 26 | 7  | 0 | 0.640276  | -0.071382 | 0.191697  |
| 27 | 6  | 0 | -2.869741 | 0.233280  | -1.249496 |
| 28 | 1  | 0 | -3.116879 | -0.670972 | -1.810034 |
| 29 | 1  | 0 | -3.209437 | 1.081299  | -1.850299 |
| 30 | 6  | 0 | -3.692402 | 0.154203  | 0.031479  |
| 31 | 6  | 0 | -3.510093 | -1.147559 | 0.847375  |
| 32 | 8  | 0 | -3.563562 | -2.201909 | 0.187670  |
| 33 | 8  | 0 | -3.334423 | -1.010184 | 2.077800  |
| 34 | 1  | 0 | -4.742718 | 0.199236  | -0.260016 |
| 35 | 7  | 0 | -3.481162 | 1.325409  | 0.938446  |
| 36 | 1  | 0 | -3.637623 | 2.214786  | 0.459224  |
| 37 | 1  | 0 | -4.124218 | 1.258977  | 1.729899  |
| 38 | 1  | 0 | -2.537906 | 1.330423  | 1.335772  |
| 39 | 8  | 0 | -0.521030 | -1.901418 | -0.896876 |
| 40 | 8  | 0 | -0.825714 | 0.206549  | -2.494114 |
| 41 | 1  | 0 | -1.216253 | -0.805647 | 0.704003  |
| 42 | 17 | 0 | -0.036542 | -3.159436 | 0.146779  |
| 43 | 1  | 0 | -1.118362 | -0.636249 | -2.866953 |

-----

**Standard orientation of TS-T1-OH-OCI-j1**

Cartesian coordinates of the transition state optimized at the M06-2X/6-311G(d) level:

Standard orientation of transition state of TS-T1-OH-OCl-j1

State=1-A

Charge = 0 Multiplicity = 1

Lowest Harmonic Vibrational Frequency (LHVF) = -611.17 cm<sup>-1</sup>

Standard orientation:

| Center<br>Number | Atomic<br>Number | Atomic<br>Type | Coordinates (Angstroms) |           |           |
|------------------|------------------|----------------|-------------------------|-----------|-----------|
|                  |                  |                | X                       | Y         | Z         |
| 1                | 1                | 0              | 1.277715                | 0.597252  | 1.688354  |
| 2                | 8                | 0              | 4.178968                | 1.384741  | 1.735660  |
| 3                | 1                | 0              | 4.237561                | 2.232020  | 1.281636  |
| 4                | 17               | 0              | 2.062348                | -1.021751 | -0.011233 |
| 5                | 8                | 0              | 1.850884                | 1.030339  | 2.568731  |
| 6                | 1                | 0              | 1.842357                | 0.403352  | 3.304405  |
| 7                | 1                | 0              | 2.833666                | 1.174439  | 2.256160  |
| 8                | 8                | 0              | 3.922903                | -2.301877 | -0.621323 |
| 9                | 1                | 0              | 4.545704                | 0.680812  | 1.115068  |
| 10               | 1                | 0              | 3.844967                | -2.179124 | -1.573102 |
| 11               | 8                | 0              | 5.266091                | -0.369433 | 0.175556  |
| 12               | 1                | 0              | 4.699487                | -1.201820 | -0.164777 |
| 13               | 1                | 0              | 6.023637                | -0.717386 | 0.655407  |
| 14               | 6                | 0              | 0.543262                | 1.160910  | -0.430839 |
| 15               | 6                | 0              | -0.641466               | 0.988118  | -1.139754 |
| 16               | 6                | 0              | -1.029105               | 1.917213  | -2.094001 |
| 17               | 6                | 0              | -0.205552               | 3.021474  | -2.308479 |
| 18               | 6                | 0              | 0.983073                | 3.178395  | -1.592783 |
| 19               | 6                | 0              | 1.377611                | 2.245629  | -0.635659 |
| 20               | 6                | 0              | -0.603076               | -0.498369 | 0.662708  |
| 21               | 6                | 0              | -1.265701               | -0.326521 | -0.728173 |
| 22               | 1                | 0              | -1.947018               | 1.787299  | -2.657827 |
| 23               | 1                | 0              | -0.488150               | 3.765324  | -3.043436 |
| 24               | 1                | 0              | 1.608708                | 4.042723  | -1.780746 |
| 25               | 1                | 0              | 2.300683                | 2.350779  | -0.075990 |
| 26               | 7                | 0              | 0.747738                | 0.115752  | 0.529124  |
| 27               | 6                | 0              | -2.786022               | -0.429927 | -0.784937 |
| 28               | 1                | 0              | -3.064801               | -1.477919 | -0.673056 |
| 29               | 1                | 0              | -3.104077               | -0.119981 | -1.784210 |
| 30               | 6                | 0              | -3.605849               | 0.301907  | 0.268315  |
| 31               | 6                | 0              | -3.410872               | -0.185031 | 1.725094  |
| 32               | 8                | 0              | -3.205867               | -1.413302 | 1.865661  |
| 33               | 8                | 0              | -3.494979               | 0.684938  | 2.610066  |

|    |    |   |           |           |           |
|----|----|---|-----------|-----------|-----------|
| 34 | 1  | 0 | -4.657321 | 0.137237  | 0.024931  |
| 35 | 7  | 0 | -3.425527 | 1.787295  | 0.237907  |
| 36 | 1  | 0 | -3.657556 | 2.181304  | -0.676783 |
| 37 | 1  | 0 | -4.027157 | 2.207378  | 0.950246  |
| 38 | 1  | 0 | -2.466105 | 2.060682  | 0.469259  |
| 39 | 8  | 0 | -0.527226 | -1.774508 | 1.186580  |
| 40 | 1  | 0 | -1.411352 | -1.960354 | 1.555343  |
| 41 | 8  | 0 | -0.673639 | -1.198337 | -1.720810 |
| 42 | 1  | 0 | -1.108150 | 0.184401  | 1.358313  |
| 43 | 17 | 0 | -1.074887 | -2.863722 | -1.615140 |

### Standard orientation of TS-T1-OCI-OCI-j1

Cartesian coordinates of the transition state optimized at the M06-2X/6-311G(d) level:

Standard orientation of transition state of TS-T1-OCI-OCI-j1

State=1-A

Charge = 0 Multiplicity = 1

Lowest Harmonic Vibrational Frequency (LHVF) = -207.75 cm<sup>-1</sup>

Standard orientation:

| Center<br>Number | Atomic<br>Number | Atomic<br>Type | Coordinates (Angstroms) |           |           |
|------------------|------------------|----------------|-------------------------|-----------|-----------|
|                  |                  |                | X                       | Y         | Z         |
| 1                | 1                | 0              | -1.386964               | 0.098146  | -1.721697 |
| 2                | 8                | 0              | -4.262677               | 0.841211  | -1.945006 |
| 3                | 1                | 0              | -4.315557               | 1.783999  | -1.755004 |
| 4                | 17               | 0              | -2.133449               | -0.648006 | 0.655806  |
| 5                | 8                | 0              | -1.972943               | 0.220588  | -2.622880 |
| 6                | 1                | 0              | -1.981837               | -0.600001 | -3.133753 |
| 7                | 1                | 0              | -2.965150               | 0.474898  | -2.346037 |
| 8                | 8                | 0              | -3.817121               | -1.407407 | 1.764320  |
| 9                | 1                | 0              | -4.640492               | 0.347081  | -1.157456 |
| 10               | 1                | 0              | -3.822951               | -0.802352 | 2.513962  |
| 11               | 8                | 0              | -5.387558               | -0.430746 | 0.022123  |
| 12               | 1                | 0              | -4.768225               | -0.824013 | 0.739268  |
| 13               | 1                | 0              | -5.851562               | -1.171239 | -0.380783 |
| 14               | 6                | 0              | -0.502694               | 1.437020  | -0.002504 |
| 15               | 6                | 0              | 0.695448                | 1.568462  | 0.695217  |
| 16               | 6                | 0              | 1.109426                | 2.803615  | 1.173495  |
| 17               | 6                | 0              | 0.304814                | 3.910820  | 0.915687  |
| 18               | 6                | 0              | -0.894626               | 3.771056  | 0.212312  |
| 19               | 6                | 0              | -1.317973               | 2.530912  | -0.257570 |

|    |    |   |           |           |           |
|----|----|---|-----------|-----------|-----------|
| 20 | 6  | 0 | 0.564767  | -0.561330 | -0.243122 |
| 21 | 6  | 0 | 1.312775  | 0.201108  | 0.882759  |
| 22 | 1  | 0 | 2.034813  | 2.903311  | 1.731602  |
| 23 | 1  | 0 | 0.608132  | 4.889090  | 1.268161  |
| 24 | 1  | 0 | -1.507724 | 4.645083  | 0.026569  |
| 25 | 1  | 0 | -2.252481 | 2.412970  | -0.795413 |
| 26 | 7  | 0 | -0.755337 | 0.096227  | -0.404033 |
| 27 | 6  | 0 | 2.836499  | 0.117107  | 0.879492  |
| 28 | 1  | 0 | 3.133766  | -0.890768 | 1.169852  |
| 29 | 1  | 0 | 3.196432  | 0.795069  | 1.658386  |
| 30 | 6  | 0 | 3.590181  | 0.381948  | -0.420130 |
| 31 | 6  | 0 | 3.369715  | -0.674293 | -1.530467 |
| 32 | 8  | 0 | 3.467789  | -1.858245 | -1.160854 |
| 33 | 8  | 0 | 3.125057  | -0.232788 | -2.673998 |
| 34 | 1  | 0 | 4.652488  | 0.361596  | -0.173357 |
| 35 | 7  | 0 | 3.340918  | 1.743673  | -0.987779 |
| 36 | 1  | 0 | 3.532989  | 2.483342  | -0.307979 |
| 37 | 1  | 0 | 3.939391  | 1.881859  | -1.804790 |
| 38 | 1  | 0 | 2.377080  | 1.845967  | -1.316450 |
| 39 | 8  | 0 | 0.498150  | -1.922819 | 0.050437  |
| 40 | 8  | 0 | 0.793899  | -0.122247 | 2.193014  |
| 41 | 1  | 0 | 1.084342  | -0.389581 | -1.190594 |
| 42 | 17 | 0 | 1.280098  | -1.624712 | 2.867168  |
| 43 | 17 | 0 | -0.036785 | -2.829793 | -1.295331 |

## Standard orientation of TS-T1-OCI-OH-j2

Cartesian coordinates of the transition state optimized at the M06-2X/6-311+G(d) level:

Standard orientation of transition state of TS-T1-OCI-OH-j2

State=1-A

Charge = -1 Multiplicity = 1

Lowest Harmonic Vibrational Frequency (LHVF) = -1125.30 cm<sup>-1</sup>

Standard orientation:

| Center Number | Atomic Number | Atomic Type | Coordinates (Angstroms) |           |           |
|---------------|---------------|-------------|-------------------------|-----------|-----------|
|               |               |             | X                       | Y         | Z         |
| 1             | 8             | 0           | 0.476063                | -1.423234 | 1.519373  |
| 2             | 8             | 0           | 1.562137                | 1.567784  | 0.768362  |
| 3             | 6             | 0           | -1.829053               | 0.756363  | 0.349935  |
| 4             | 6             | 0           | -1.386799               | 0.307209  | -0.898736 |
| 5             | 6             | 0           | -2.256034               | -0.319914 | -1.775607 |

|    |    |   |           |           |           |
|----|----|---|-----------|-----------|-----------|
| 6  | 6  | 0 | -3.576509 | -0.537738 | -1.373247 |
| 7  | 6  | 0 | -4.001711 | -0.112743 | -0.114195 |
| 8  | 6  | 0 | -3.137736 | 0.541940  | 0.764623  |
| 9  | 6  | 0 | 0.437164  | 0.984741  | 0.404098  |
| 10 | 6  | 0 | 0.056420  | 0.731177  | -1.076078 |
| 11 | 1  | 0 | -1.915097 | -0.649649 | -2.753417 |
| 12 | 1  | 0 | -4.269236 | -1.041175 | -2.037151 |
| 13 | 1  | 0 | -5.026001 | -0.294630 | 0.192076  |
| 14 | 1  | 0 | -3.474344 | 0.869625  | 1.741900  |
| 15 | 1  | 0 | -0.814255 | 1.317778  | 2.045376  |
| 16 | 1  | 0 | 0.649953  | -0.125687 | 0.933685  |
| 17 | 7  | 0 | -0.796718 | 1.413779  | 1.034784  |
| 18 | 17 | 0 | -0.617349 | -1.365816 | 2.806501  |
| 19 | 6  | 0 | 0.955060  | -0.194441 | -1.903222 |
| 20 | 1  | 0 | 1.908707  | 0.318826  | -2.039439 |
| 21 | 1  | 0 | 0.488268  | -0.241224 | -2.892901 |
| 22 | 6  | 0 | 1.299814  | -1.623130 | -1.488125 |
| 23 | 6  | 0 | 2.451890  | -1.825936 | -0.469491 |
| 24 | 8  | 0 | 3.210993  | -0.863837 | -0.244334 |
| 25 | 8  | 0 | 2.544478  | -2.989373 | -0.009571 |
| 26 | 1  | 0 | 1.642447  | -2.130749 | -2.392776 |
| 27 | 7  | 0 | 0.131892  | -2.422075 | -1.003486 |
| 28 | 1  | 0 | -0.668999 | -2.362488 | -1.633577 |
| 29 | 1  | 0 | 0.414568  | -3.400376 | -0.919558 |
| 30 | 1  | 0 | -0.128264 | -2.100930 | -0.048198 |
| 31 | 17 | 0 | 1.746278  | 3.503876  | 0.443339  |
| 32 | 8  | 0 | 0.077733  | 2.007920  | -1.734723 |
| 33 | 1  | 0 | -0.392028 | 1.912471  | -2.574962 |

### Standard orientation of TS-T1-OH-OCl-j3

Cartesian coordinates of the transition state optimized at the M06-2X/6-311+G(d) level:

Standard orientation of transition state of TS-T1-OH-OCl-j3

State=1-A

Charge = -1 Multiplicity = 1

Lowest Harmonic Vibrational Frequency (LHVF) = -791.78 cm<sup>-1</sup>

Standard orientation:

| Center Number | Atomic Number | Atomic Type | Coordinates (Angstroms) |           |          |
|---------------|---------------|-------------|-------------------------|-----------|----------|
|               |               |             | X                       | Y         | Z        |
| 1             | 8             | 0           | 0.313734                | -1.756274 | 1.344774 |



|    |    |   |           |           |           |
|----|----|---|-----------|-----------|-----------|
| 2  | 8  | 0 | 1.727456  | -0.739175 | -0.824442 |
| 3  | 6  | 0 | -1.220357 | -0.268325 | -1.380697 |
| 4  | 6  | 0 | -1.261396 | -1.092615 | -0.249682 |
| 5  | 6  | 0 | -2.257414 | -2.052729 | -0.101717 |
| 6  | 6  | 0 | -3.252998 | -2.144490 | -1.072656 |
| 7  | 6  | 0 | -3.243146 | -1.277544 | -2.167656 |
| 8  | 6  | 0 | -2.226897 | -0.340081 | -2.339578 |
| 9  | 6  | 0 | 0.867888  | 0.130525  | -0.409399 |
| 10 | 6  | 0 | -0.254349 | -0.699493 | 0.804513  |
| 11 | 1  | 0 | -2.278279 | -2.688599 | 0.776819  |
| 12 | 1  | 0 | -4.045001 | -2.876783 | -0.968839 |
| 13 | 1  | 0 | -4.031922 | -1.343839 | -2.908741 |
| 14 | 1  | 0 | -2.206832 | 0.310417  | -3.206581 |
| 15 | 1  | 0 | -0.307166 | 1.561771  | -1.386570 |
| 16 | 1  | 0 | 1.252795  | 0.960409  | 0.199664  |
| 17 | 7  | 0 | -0.098670 | 0.569046  | -1.404583 |
| 18 | 6  | 0 | -0.713484 | 0.284736  | 1.898687  |
| 19 | 1  | 0 | 0.175263  | 0.790796  | 2.286952  |
| 20 | 1  | 0 | -1.099200 | -0.325564 | 2.721770  |
| 21 | 6  | 0 | -1.754478 | 1.369250  | 1.622431  |
| 22 | 6  | 0 | -1.392427 | 2.433850  | 0.569508  |
| 23 | 8  | 0 | -0.296588 | 3.008382  | 0.741331  |
| 24 | 8  | 0 | -2.223020 | 2.639522  | -0.344117 |
| 25 | 1  | 0 | -1.896230 | 1.905166  | 2.562231  |
| 26 | 7  | 0 | -3.099796 | 0.794662  | 1.289845  |
| 27 | 1  | 0 | -3.291205 | -0.055711 | 1.825165  |
| 28 | 1  | 0 | -3.834643 | 1.474221  | 1.497407  |
| 29 | 1  | 0 | -3.178455 | 0.578430  | 0.292197  |
| 30 | 1  | 0 | 3.096546  | -0.426436 | -0.350460 |
| 31 | 17 | 0 | 2.262386  | -1.471235 | 1.986587  |
| 32 | 17 | 0 | 4.537749  | 0.781413  | -1.501929 |
| 33 | 8  | 0 | 4.064126  | -0.120176 | -0.144991 |

---

### Standard orientation of TS-T1-OCI-OCI-j3

Cartesian coordinates of the transition state optimized at the M06-2X/6-311+G(d) level:

Standard orientation of transition state of TS-T1-OCI-OCI-j3

State=1-A

Charge = -1 Multiplicity = 1

Lowest Harmonic Vibrational Frequency (LHVF) = -679.95 cm<sup>-1</sup>

Standard orientation:

---

| Center<br>Number | Atomic<br>Number | Atomic<br>Type | Coordinates (Angstroms) |           |           |
|------------------|------------------|----------------|-------------------------|-----------|-----------|
|                  |                  |                | X                       | Y         | Z         |
| 1                | 8                | 0              | 4.526455                | 0.195930  | -0.993948 |
| 2                | 8                | 0              | 0.824591                | 1.522898  | -1.192690 |
| 3                | 6                | 0              | -1.015999               | -1.454942 | -1.366315 |
| 4                | 6                | 0              | -1.350262               | -1.207981 | -0.027576 |
| 5                | 6                | 0              | -2.263146               | -2.019845 | 0.633655  |
| 6                | 6                | 0              | -2.848693               | -3.085080 | -0.050405 |
| 7                | 6                | 0              | -2.515408               | -3.319922 | -1.385633 |
| 8                | 6                | 0              | -1.604432               | -2.510450 | -2.059570 |
| 9                | 6                | 0              | -0.143388               | 0.678366  | -1.104294 |
| 10               | 6                | 0              | -0.557597               | -0.062713 | 0.542485  |
| 11               | 1                | 0              | -2.514840               | -1.825588 | 1.672311  |
| 12               | 1                | 0              | -3.560436               | -3.728564 | 0.452889  |
| 13               | 1                | 0              | -2.979044               | -4.145306 | -1.914661 |
| 14               | 1                | 0              | -1.357399               | -2.691464 | -3.099832 |
| 15               | 1                | 0              | -0.035771               | -0.421799 | -2.856036 |
| 16               | 1                | 0              | -1.138125               | 1.142761  | -1.207418 |
| 17               | 7                | 0              | -0.066675               | -0.561127 | -1.850744 |
| 18               | 17               | 0              | 4.970453                | -0.299543 | 0.562423  |
| 19               | 6                | 0              | -1.229083               | 0.901451  | 1.509570  |
| 20               | 1                | 0              | -0.464973               | 1.589785  | 1.873855  |
| 21               | 1                | 0              | -1.537491               | 0.296955  | 2.372568  |
| 22               | 6                | 0              | -2.416240               | 1.762070  | 1.082291  |
| 23               | 6                | 0              | -2.104072               | 2.901229  | 0.085766  |
| 24               | 8                | 0              | -1.103064               | 3.594346  | 0.356257  |
| 25               | 8                | 0              | -2.901577               | 3.048950  | -0.868491 |
| 26               | 1                | 0              | -2.793848               | 2.249517  | 1.983101  |
| 27               | 7                | 0              | -3.565769               | 0.959453  | 0.559813  |
| 28               | 1                | 0              | -3.859735               | 0.245074  | 1.230041  |
| 29               | 1                | 0              | -4.358061               | 1.576049  | 0.367125  |
| 30               | 1                | 0              | -3.331464               | 0.494019  | -0.321981 |
| 31               | 17               | 0              | 2.793034                | 0.773076  | -1.066279 |
| 32               | 8                | 0              | 0.673019                | -0.380856 | 0.900770  |
| 33               | 17               | 0              | 0.794915                | -1.468413 | 2.604415  |

### Standard orientation of TS-T1-OCI-OH-k1

Cartesian coordinates of the transition state optimized at the M06-2X/6-311+G(d) level:

Standard orientation of transition state of TS-T1-OCI-OH-k1

State=1-A

Charge = -1 Multiplicity = 1

Lowest Harmonic Vibrational Frequency (LHVF) = -1339.38 cm<sup>-1</sup>

Standard orientation:

| Center<br>Number | Atomic<br>Number | Atomic<br>Type | Coordinates (Angstroms) |           |           |
|------------------|------------------|----------------|-------------------------|-----------|-----------|
|                  |                  |                | X                       | Y         | Z         |
| 1                | 8                | 0              | -1.144745               | 1.127780  | 1.594723  |
| 2                | 8                | 0              | -0.589328               | -1.945334 | 0.843460  |
| 3                | 6                | 0              | 1.785088                | 0.547112  | 0.106173  |
| 4                | 6                | 0              | 1.011552                | 0.677780  | -1.045015 |
| 5                | 6                | 0              | 1.253890                | 1.718155  | -1.932383 |
| 6                | 6                | 0              | 2.275977                | 2.618867  | -1.636869 |
| 7                | 6                | 0              | 3.045489                | 2.474200  | -0.478950 |
| 8                | 6                | 0              | 2.808784                | 1.430829  | 0.411182  |
| 9                | 6                | 0              | 0.042885                | -0.878879 | 0.370159  |
| 10               | 6                | 0              | 0.030598                | -0.477151 | -1.121971 |
| 11               | 1                | 0              | 0.665648                | 1.826404  | -2.838751 |
| 12               | 1                | 0              | 2.478534                | 3.440783  | -2.313674 |
| 13               | 1                | 0              | 3.834611                | 3.186799  | -0.269104 |
| 14               | 1                | 0              | 3.397464                | 1.310433  | 1.313569  |
| 15               | 1                | 0              | -0.582647               | 0.054164  | 1.022894  |
| 16               | 7                | 0              | 1.379687                | -0.570090 | 0.919126  |
| 17               | 17               | 0              | -0.057907               | 1.987871  | 2.565800  |
| 18               | 6                | 0              | -1.317295               | -0.205643 | -1.800947 |
| 19               | 1                | 0              | -1.806764               | -1.173781 | -1.921505 |
| 20               | 1                | 0              | -1.061187               | 0.132456  | -2.809364 |
| 21               | 6                | 0              | -2.391383               | 0.732175  | -1.257931 |
| 22               | 6                | 0              | -3.306800               | 0.214516  | -0.119300 |
| 23               | 8                | 0              | -3.376834               | -1.018086 | 0.051924  |
| 24               | 8                | 0              | -3.961457               | 1.102157  | 0.477171  |
| 25               | 1                | 0              | -3.074216               | 0.908785  | -2.092489 |
| 26               | 7                | 0              | -1.890213               | 2.082143  | -0.860773 |
| 27               | 1                | 0              | -1.300005               | 2.504327  | -1.578413 |
| 28               | 1                | 0              | -2.688885               | 2.695039  | -0.686632 |
| 29               | 1                | 0              | -1.376208               | 1.993209  | 0.039888  |
| 30               | 17               | 0              | -0.174863               | -3.652215 | 0.148659  |
| 31               | 8                | 0              | 0.574016                | -1.504499 | -1.967143 |
| 32               | 1                | 0              | 1.432121                | -1.798646 | -1.631730 |
| 33               | 17               | 0              | 2.598022                | -1.916376 | 0.602651  |

**Standard orientation of TS-T1-OH-OH-k2**

Cartesian coordinates of the transition state optimized at the M06-2X/6-311+G(d)  
level:

Standard orientation of transition state of TS-T1-OH-OH-k2

State=1-A

Charge = -1 Multiplicity = 1

Lowest Harmonic Vibrational Frequency (LHVF) = -462.00 cm<sup>-1</sup>

Standard orientation:

| -----            |                  |                |                         |           |           |  |
|------------------|------------------|----------------|-------------------------|-----------|-----------|--|
| Center<br>Number | Atomic<br>Number | Atomic<br>Type | Coordinates (Angstroms) |           |           |  |
|                  |                  |                | X                       | Y         | Z         |  |
| -----            |                  |                |                         |           |           |  |
| 1                | 17               | 0              | -2.844207               | 2.237693  | 0.807379  |  |
| 2                | 6                | 0              | -1.675203               | -0.397945 | 0.169857  |  |
| 3                | 6                | 0              | -0.990611               | -0.274959 | -1.048209 |  |
| 4                | 6                | 0              | -1.230769               | -1.165908 | -2.077889 |  |
| 5                | 6                | 0              | -2.198079               | -2.153570 | -1.874833 |  |
| 6                | 6                | 0              | -2.899785               | -2.254202 | -0.666466 |  |
| 7                | 6                | 0              | -2.647267               | -1.375670 | 0.376997  |  |
| 8                | 6                | 0              | -0.045157               | 1.031199  | 0.616891  |  |
| 9                | 6                | 0              | -0.087688               | 0.933489  | -0.951716 |  |
| 10               | 1                | 0              | -0.701255               | -1.093795 | -3.022204 |  |
| 11               | 1                | 0              | -2.418423               | -2.852920 | -2.673157 |  |
| 12               | 1                | 0              | -3.644303               | -3.032129 | -0.547347 |  |
| 13               | 1                | 0              | -3.169177               | -1.446724 | 1.324138  |  |
| 14               | 7                | 0              | -1.242455               | 0.525721  | 1.126167  |  |
| 15               | 6                | 0              | 1.220247                | 0.903274  | -1.740943 |  |
| 16               | 1                | 0              | 1.583410                | 1.931875  | -1.774213 |  |
| 17               | 1                | 0              | 0.951902                | 0.643894  | -2.769943 |  |
| 18               | 6                | 0              | 2.419817                | 0.062893  | -1.333371 |  |
| 19               | 6                | 0              | 3.193022                | 0.498072  | -0.064338 |  |
| 20               | 8                | 0              | 2.935700                | 1.625614  | 0.421584  |  |
| 21               | 8                | 0              | 4.066319                | -0.303158 | 0.326116  |  |
| 22               | 1                | 0              | 3.142287                | 0.157883  | -2.147248 |  |
| 23               | 7                | 0              | 2.129357                | -1.399108 | -1.220751 |  |
| 24               | 1                | 0              | 1.585503                | -1.741654 | -2.014134 |  |
| 25               | 1                | 0              | 3.009269                | -1.916931 | -1.184952 |  |
| 26               | 1                | 0              | 1.631822                | -1.583453 | -0.313863 |  |
| 27               | 8                | 0              | 0.367566                | 2.224857  | 1.168502  |  |
| 28               | 1                | 0              | 1.327828                | 2.278446  | 0.988845  |  |
| 29               | 8                | 0              | -0.747818               | 2.087350  | -1.467152 |  |
| 30               | 1                | 0              | -1.568396               | 2.243773  | -0.965201 |  |
| 31               | 1                | 0              | 0.633224                | 0.128580  | 0.979548  |  |
| 32               | 8                | 0              | 1.407969                | -1.223890 | 1.334776  |  |
| 33               | 17               | 0              | 0.305322                | -2.104126 | 2.255875  |  |

-----

### Standard orientation of TS-T1-OH-OCI-k3

Cartesian coordinates of the transition state optimized at the M06-2X/6-311+G(d)  
level:

Standard orientation of transition state of TS-T1-OH-OCI-k3

State=1-A

Charge = -1 Multiplicity = 1

Lowest Harmonic Vibrational Frequency (LHVF) = -1286.55 cm<sup>-1</sup>

Standard orientation:

-----

| Center<br>Number | Atomic<br>Number | Atomic<br>Type | Coordinates (Angstroms) |           |           |
|------------------|------------------|----------------|-------------------------|-----------|-----------|
|                  |                  |                | X                       | Y         | Z         |
| 1                | 8                | 0              | -0.251863               | 2.687426  | -1.110609 |
| 2                | 8                | 0              | -0.791210               | 1.023942  | 1.626492  |
| 3                | 6                | 0              | 2.158333                | 0.111520  | -0.002800 |
| 4                | 6                | 0              | 1.284806                | -0.692405 | -0.737084 |
| 5                | 6                | 0              | 1.753567                | -1.445708 | -1.799725 |
| 6                | 6                | 0              | 3.122515                | -1.411465 | -2.076541 |
| 7                | 6                | 0              | 3.991501                | -0.618402 | -1.324046 |
| 8                | 6                | 0              | 3.517043                | 0.165606  | -0.275685 |
| 9                | 6                | 0              | 0.153457                | 0.771361  | 0.646306  |
| 10               | 6                | 0              | -0.122881               | -0.479679 | -0.225110 |
| 11               | 1                | 0              | 1.084150                | -2.049548 | -2.402294 |
| 12               | 1                | 0              | 3.515775                | -2.006371 | -2.892617 |
| 13               | 1                | 0              | 5.047734                | -0.606152 | -1.565946 |
| 14               | 1                | 0              | 4.177441                | 0.794357  | 0.309981  |
| 15               | 1                | 0              | 0.113965                | 1.717743  | -0.212341 |
| 16               | 7                | 0              | 1.487005                | 0.864591  | 0.999262  |
| 17               | 17               | 0              | -0.006155               | 4.165155  | -0.322955 |
| 18               | 6                | 0              | -1.124214               | -0.317882 | -1.369513 |
| 19               | 1                | 0              | -1.169284               | -1.265465 | -1.913366 |
| 20               | 1                | 0              | -0.718794               | 0.416116  | -2.071477 |
| 21               | 6                | 0              | -2.567937               | 0.062032  | -1.035819 |
| 22               | 6                | 0              | -3.293017               | -0.943418 | -0.116428 |
| 23               | 8                | 0              | -3.501683               | -2.066200 | -0.622150 |
| 24               | 8                | 0              | -3.622557               | -0.546593 | 1.024039  |
| 25               | 1                | 0              | -3.110453               | 0.090830  | -1.980146 |
| 26               | 7                | 0              | -2.668127               | 1.432602  | -0.452731 |
| 27               | 1                | 0              | -1.981124               | 2.081478  | -0.879912 |
| 28               | 1                | 0              | -3.612339               | 1.801976  | -0.566152 |
| 29               | 1                | 0              | -2.465035               | 1.390964  | 0.552858  |

-----

|    |    |   |           |           |          |
|----|----|---|-----------|-----------|----------|
| 30 | 17 | 0 | 1.844781  | -0.396761 | 2.766891 |
| 31 | 8  | 0 | -0.556071 | -1.480016 | 0.719568 |
| 32 | 17 | 0 | -0.401595 | -3.083673 | 0.168340 |
| 33 | 1  | 0 | -0.495670 | 1.755641  | 2.186945 |

### Standard orientation of TS-T1-OCI-OCI-k3

Cartesian coordinates of the transition state optimized at the M06-2X/6-311+G(d) level:

Standard orientation of transition state of TS-T1-OCI-OCI-k3

State=1-A

Charge = -1 Multiplicity = 1

Lowest Harmonic Vibrational Frequency (LHVF) = -1340.21 cm<sup>-1</sup>

Standard orientation:

| Center Number | Atomic Number | Atomic Type | Coordinates (Angstroms) |           |           |
|---------------|---------------|-------------|-------------------------|-----------|-----------|
|               |               |             | X                       | Y         | Z         |
| 1             | 8             | 0           | -0.359347               | 2.145639  | -1.664365 |
| 2             | 8             | 0           | -1.027578               | 0.829554  | 1.274885  |
| 3             | 6             | 0           | 2.186901                | 0.200326  | 0.076929  |
| 4             | 6             | 0           | 1.507025                | -0.785691 | -0.638065 |
| 5             | 6             | 0           | 2.180681                | -1.576046 | -1.554102 |
| 6             | 6             | 0           | 3.556053                | -1.382886 | -1.702771 |
| 7             | 6             | 0           | 4.229872                | -0.404889 | -0.968914 |
| 8             | 6             | 0           | 3.548305                | 0.411134  | -0.068667 |
| 9             | 6             | 0           | 0.056210                | 0.652648  | 0.414011  |
| 10            | 6             | 0           | 0.035043                | -0.726546 | -0.283585 |
| 11            | 1             | 0           | 1.662678                | -2.325877 | -2.141760 |
| 12            | 1             | 0           | 4.107667                | -1.997931 | -2.404128 |
| 13            | 1             | 0           | 5.296295                | -0.272120 | -1.108921 |
| 14            | 1             | 0           | 4.056313                | 1.181748  | 0.499283  |
| 15            | 1             | 0           | -0.035565               | 1.512539  | -0.635604 |
| 16            | 7             | 0           | 1.314704                | 0.957205  | 0.920884  |
| 17            | 17            | 0           | -0.014377               | 3.785942  | -1.451755 |
| 18            | 6             | 0           | -0.862284               | -0.879998 | -1.511639 |
| 19            | 1             | 0           | -0.724373               | -1.894715 | -1.895448 |
| 20            | 1             | 0           | -0.494827               | -0.210011 | -2.292787 |
| 21            | 6             | 0           | -2.371178               | -0.682635 | -1.357578 |
| 22            | 6             | 0           | -3.026221               | -1.600956 | -0.300605 |
| 23            | 8             | 0           | -3.028339               | -2.816590 | -0.580522 |
| 24            | 8             | 0           | -3.505173               | -1.049082 | 0.716434  |
| 25            | 1             | 0           | -2.817940               | -0.919974 | -2.321986 |

|    |    |   |           |           |           |
|----|----|---|-----------|-----------|-----------|
| 26 | 7  | 0 | -2.742693 | 0.736607  | -1.059095 |
| 27 | 1  | 0 | -2.048124 | 1.420163  | -1.410861 |
| 28 | 1  | 0 | -3.652030 | 0.957303  | -1.467857 |
| 29 | 1  | 0 | -2.839622 | 0.832480  | -0.042707 |
| 30 | 17 | 0 | 1.596744  | 0.022666  | 2.778440  |
| 31 | 17 | 0 | -1.244574 | 2.466637  | 1.742133  |
| 32 | 8  | 0 | -0.336900 | -1.661390 | 0.755150  |
| 33 | 17 | 0 | 0.091719  | -3.279487 | 0.433977  |

### Standard orientation of TS-T1-tautomerize3

Cartesian coordinates of the transition state optimized at the M06-2X/6-311G(d) level:

Standard orientation of transition state of TS-T1-tautomerize3

State=1-A

Charge = 0 Multiplicity = 1

Lowest Harmonic Vibrational Frequency (LHVF) = -706.40 cm<sup>-1</sup>

Standard orientation:

| Center Number | Atomic Number | Atomic Type | Coordinates (Angstroms) |           |           |
|---------------|---------------|-------------|-------------------------|-----------|-----------|
|               |               |             | X                       | Y         | Z         |
| 1             | 1             | 0           | 1.521367                | 2.018771  | 0.046665  |
| 2             | 1             | 0           | 4.188012                | 1.511573  | -1.445025 |
| 3             | 8             | 0           | 3.767608                | 0.912660  | -0.814218 |
| 4             | 1             | 0           | 3.043736                | 0.389112  | -1.297326 |
| 5             | 8             | 0           | 2.306626                | 2.125553  | 0.665079  |
| 6             | 1             | 0           | 2.061826                | 1.545100  | 1.421962  |
| 7             | 1             | 0           | 3.168482                | 1.529311  | -0.030763 |
| 8             | 8             | 0           | 1.775467                | -0.394503 | -1.785209 |
| 9             | 6             | 0           | -0.998200               | 1.164998  | -0.509190 |
| 10            | 6             | 0           | -1.581806               | -0.100549 | -0.676832 |
| 11            | 6             | 0           | -2.908962               | -0.334669 | -0.373742 |
| 12            | 6             | 0           | -3.671757               | 0.720724  | 0.140576  |
| 13            | 6             | 0           | -3.086304               | 1.969428  | 0.340674  |
| 14            | 6             | 0           | -1.747410               | 2.210565  | 0.017853  |
| 15            | 6             | 0           | 0.672401                | -0.012374 | -1.320710 |
| 16            | 6             | 0           | -0.487397               | -1.020893 | -1.143681 |
| 17            | 1             | 0           | -3.345309               | -1.319834 | -0.513608 |
| 18            | 1             | 0           | -4.715075               | 0.565896  | 0.388884  |
| 19            | 1             | 0           | -3.683283               | 2.776729  | 0.750682  |
| 20            | 1             | 0           | -1.304318               | 3.188966  | 0.168207  |
| 21            | 7             | 0           | 0.346952                | 1.207035  | -0.915999 |

|    |   |   |           |           |           |
|----|---|---|-----------|-----------|-----------|
| 22 | 6 | 0 | -0.125658 | -2.119219 | -0.127212 |
| 23 | 1 | 0 | -0.936561 | -2.855920 | -0.146841 |
| 24 | 6 | 0 | 0.150500  | -1.752553 | 1.333666  |
| 25 | 1 | 0 | 0.437854  | -2.674223 | 1.839667  |
| 26 | 1 | 0 | 0.772797  | -2.616852 | -0.498722 |
| 27 | 7 | 0 | -1.067274 | -1.261982 | 2.056044  |
| 28 | 1 | 0 | -1.900558 | -1.802148 | 1.813214  |
| 29 | 1 | 0 | -0.921899 | -1.328679 | 3.065279  |
| 30 | 1 | 0 | -1.239982 | -0.275157 | 1.847199  |
| 31 | 6 | 0 | 1.293288  | -0.739918 | 1.553535  |
| 32 | 8 | 0 | 1.000197  | 0.313851  | 2.176055  |
| 33 | 8 | 0 | 2.400608  | -1.068642 | 1.100957  |
| 34 | 8 | 0 | -0.713050 | -1.631442 | -2.403519 |
| 35 | 1 | 0 | -1.456638 | -2.241053 | -2.312580 |

---
